# Supplementary material for: Burst of Young Retrogenes and Independent Retrogene Formation in Mammals
Source: PubMed Central journal article supplement (PMC2657826; doi:10.1371/journal.pone.0005040), 2009-03-27

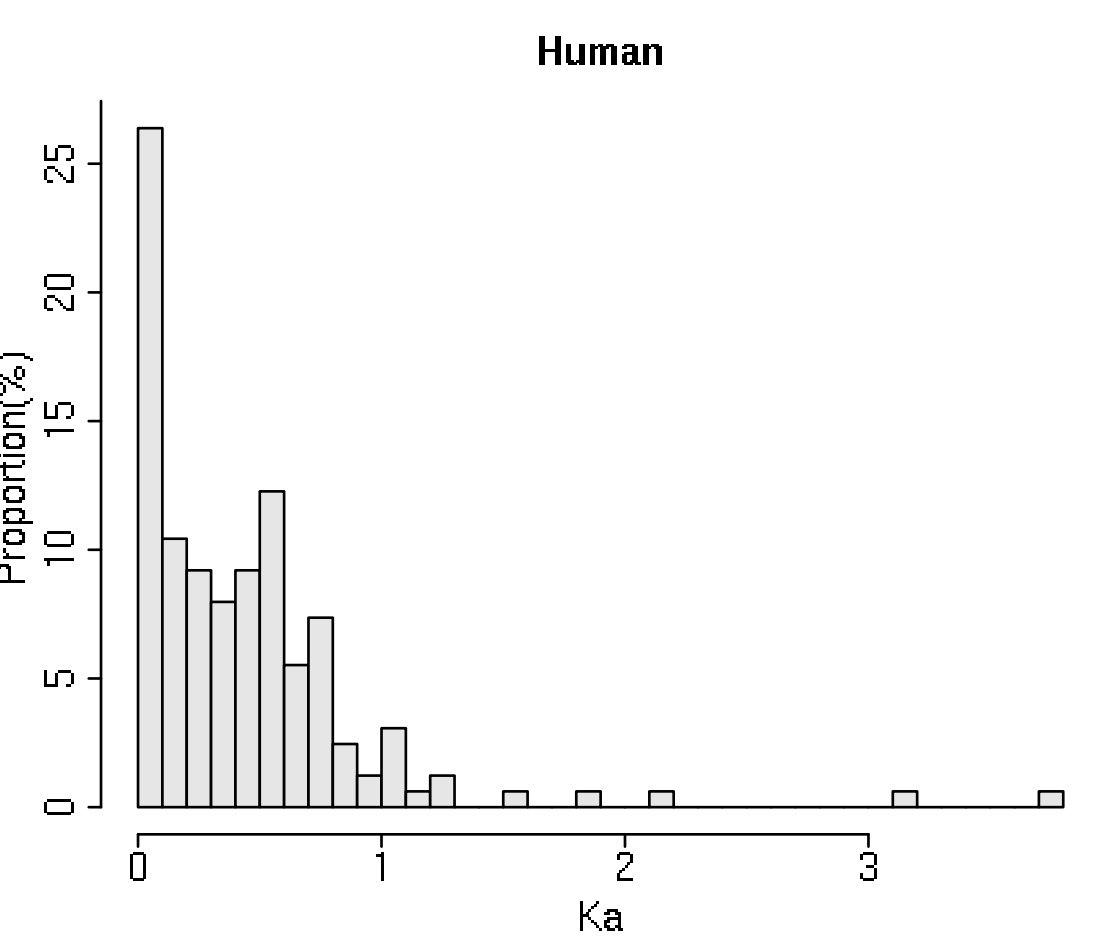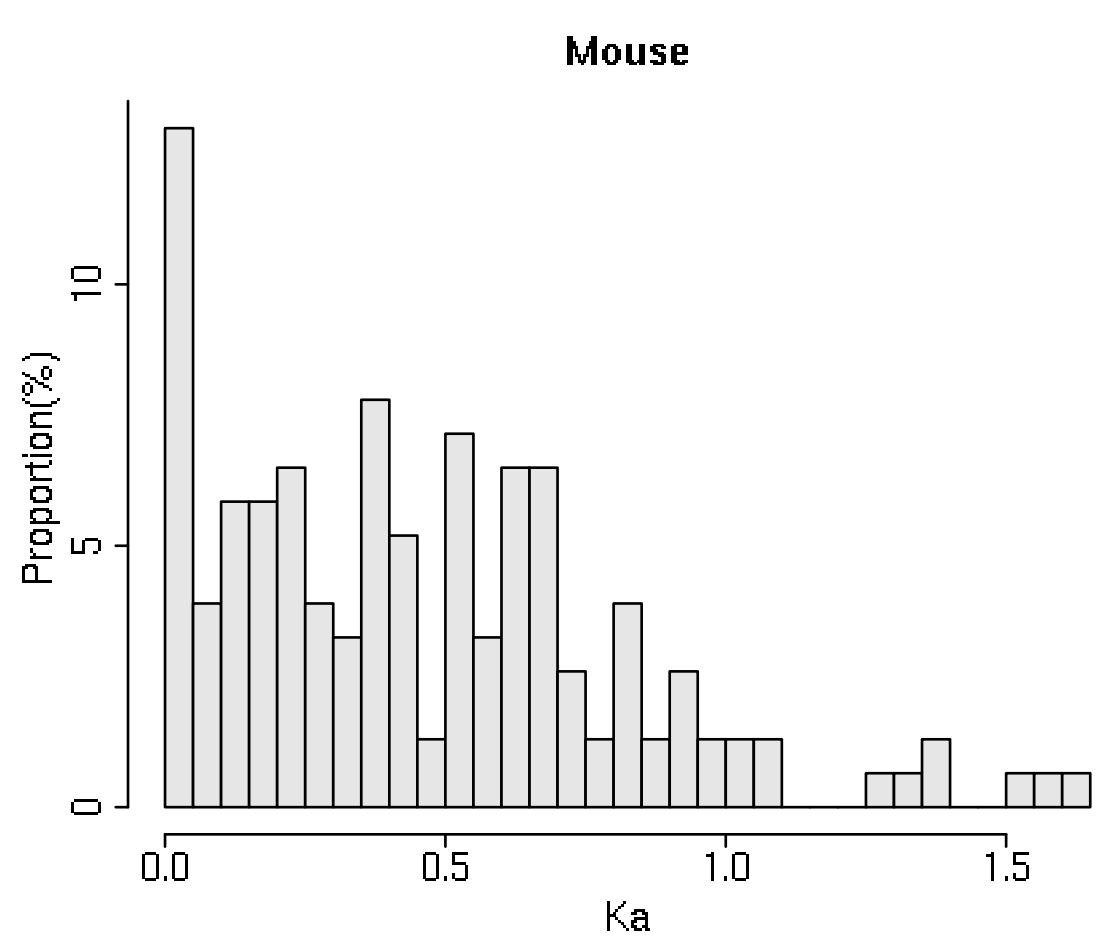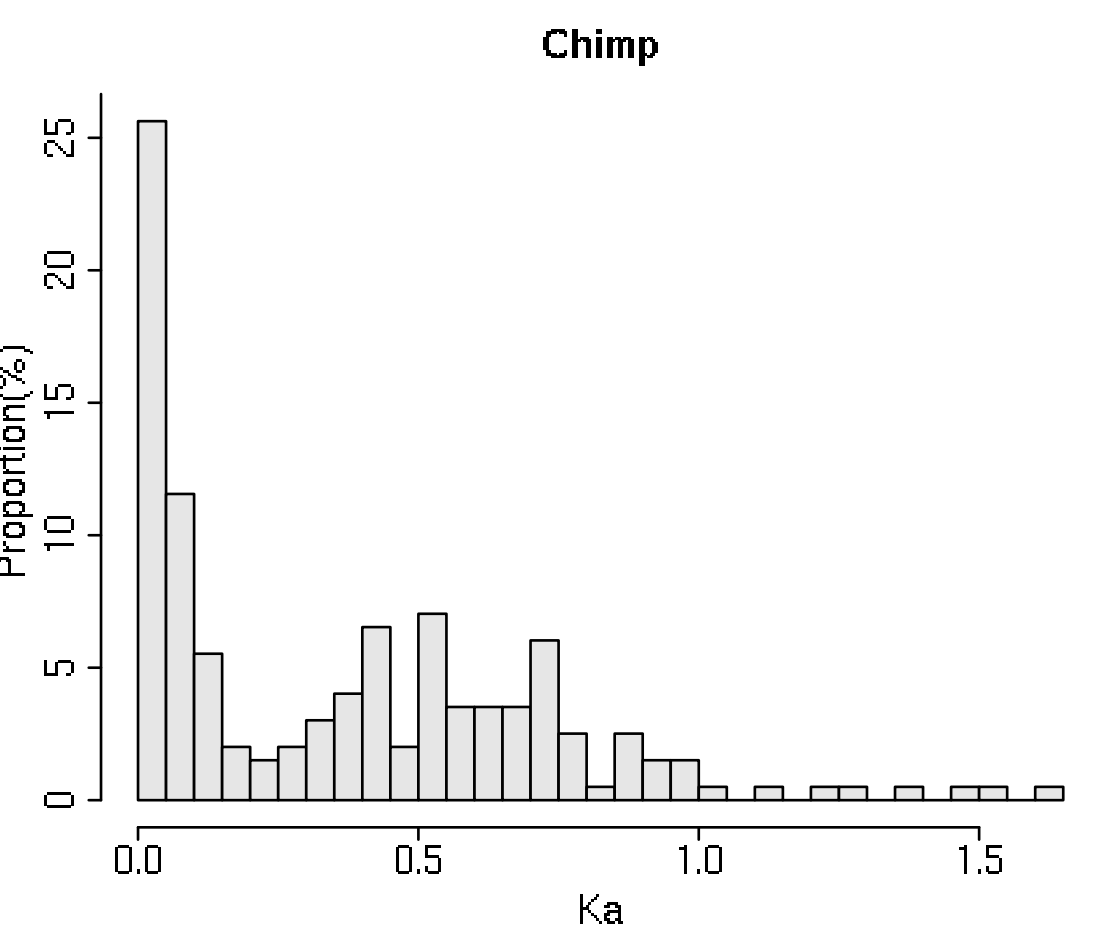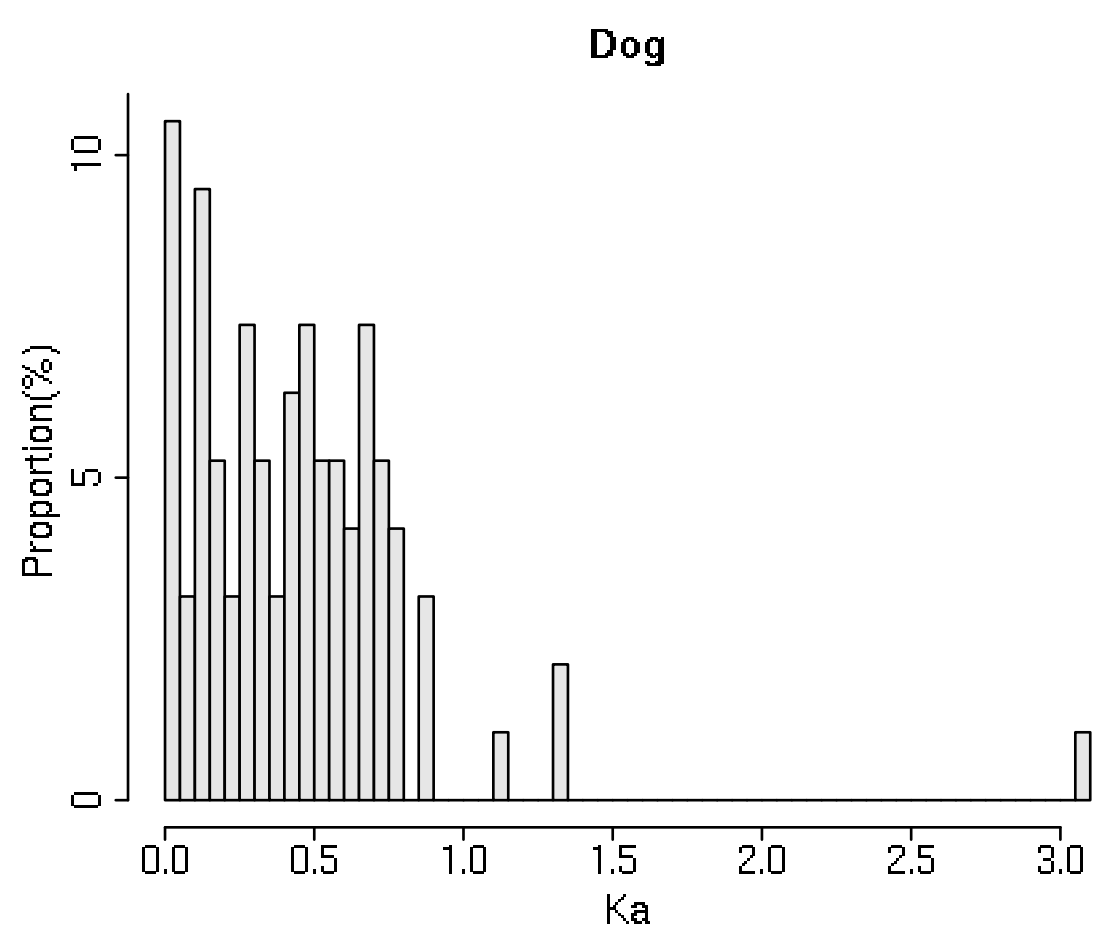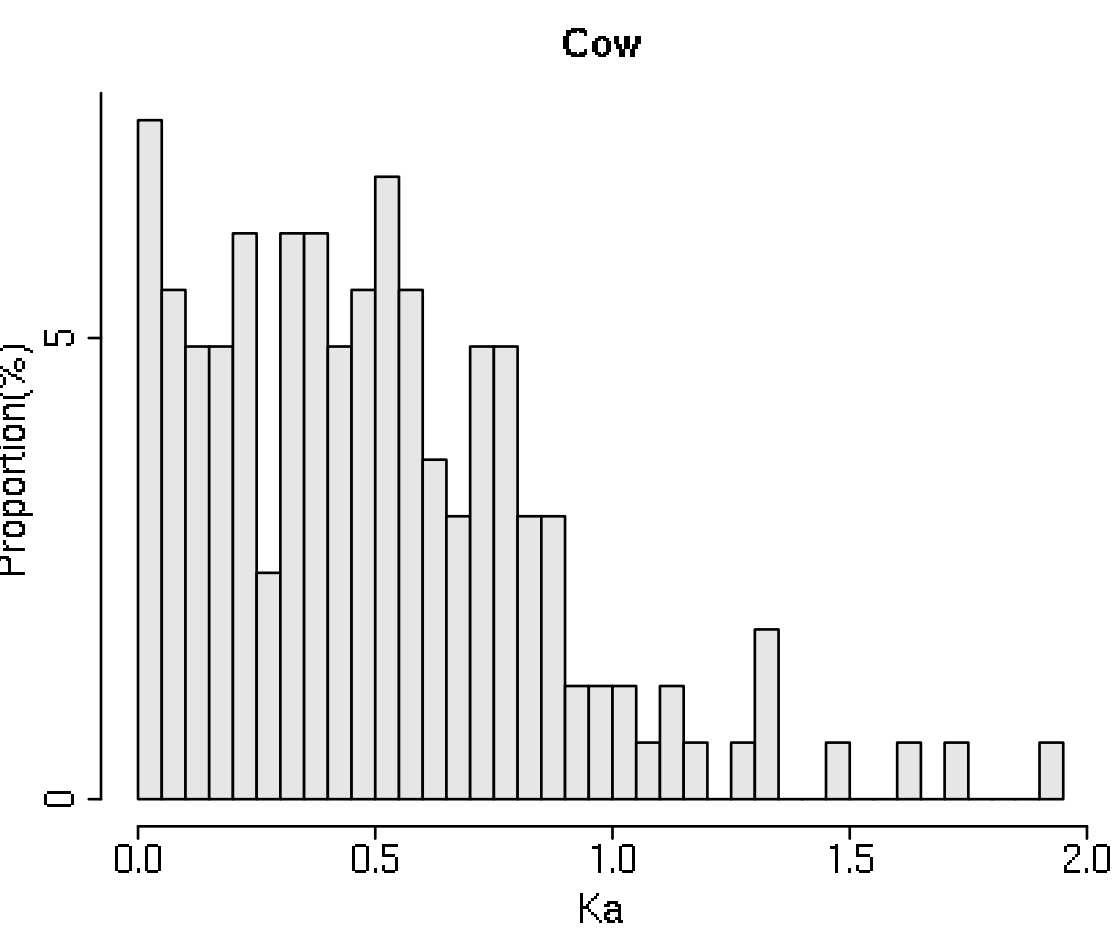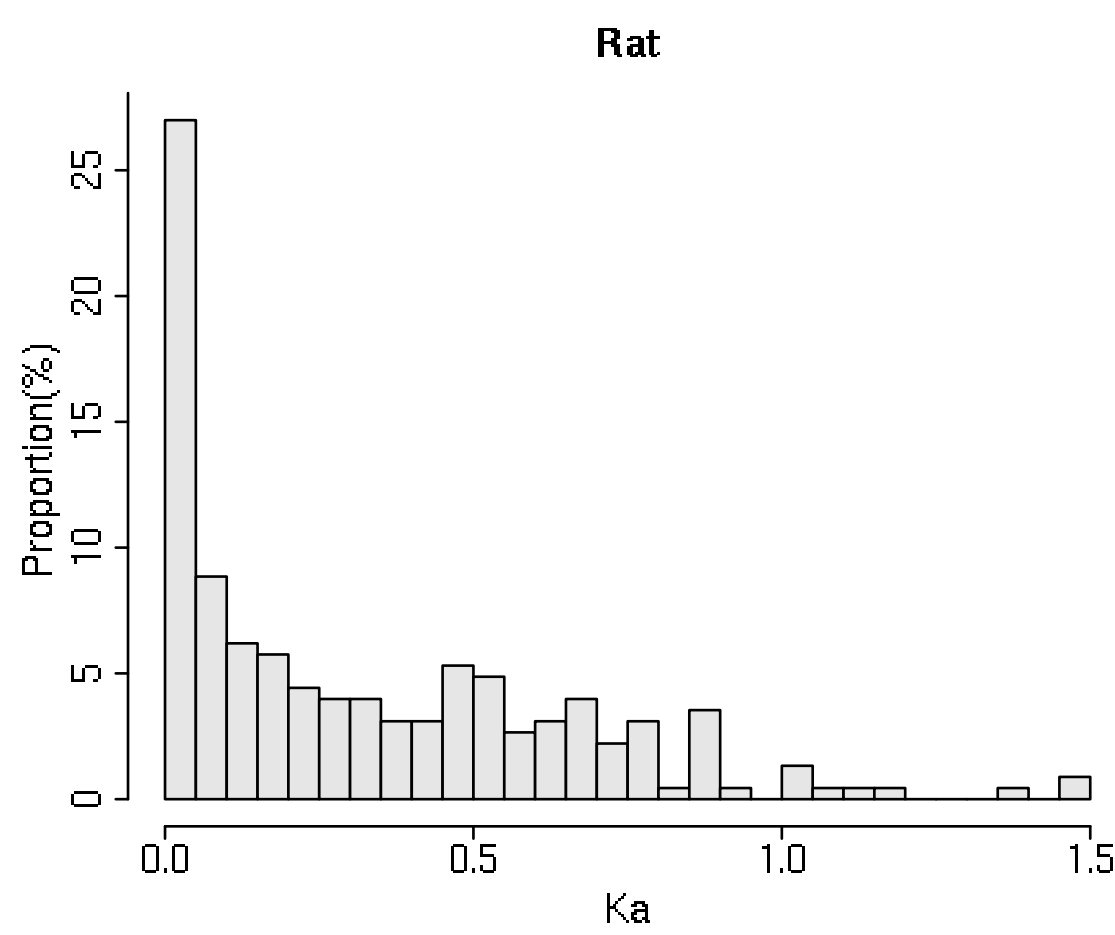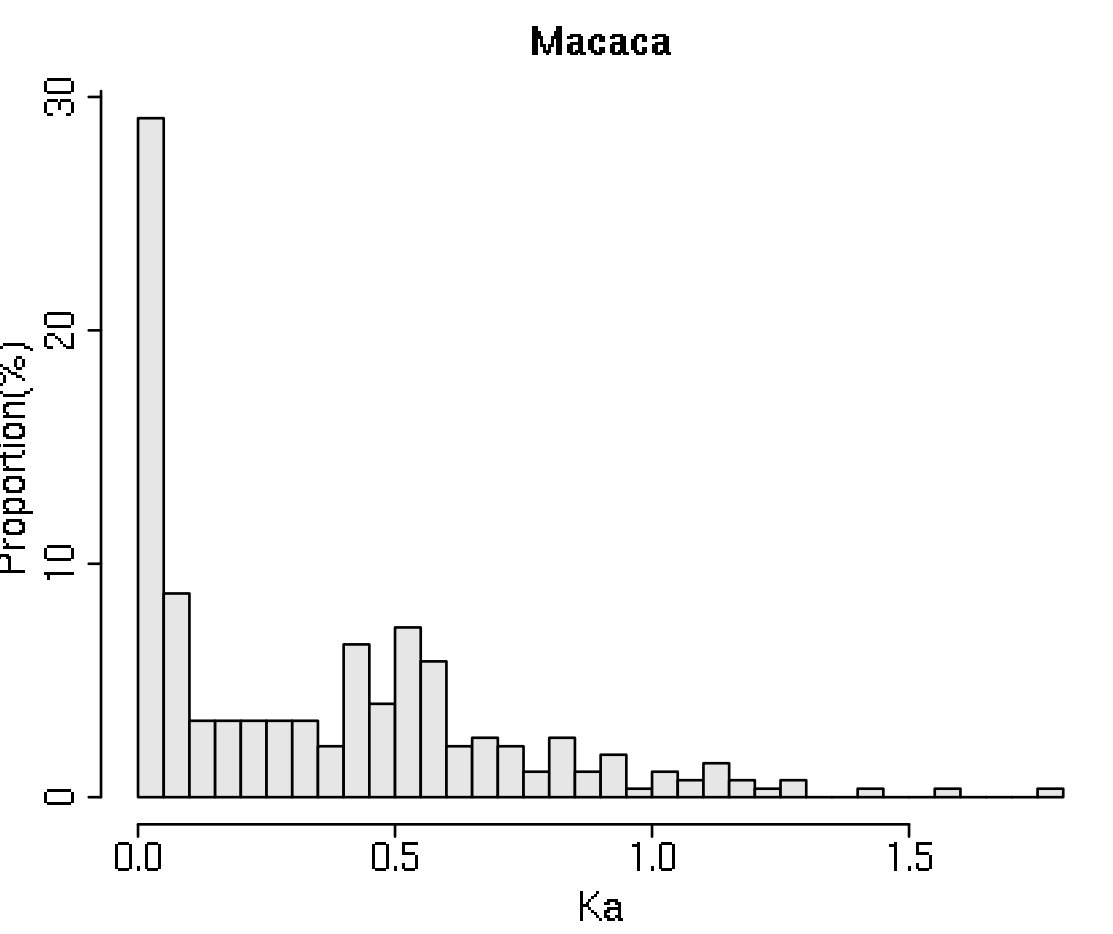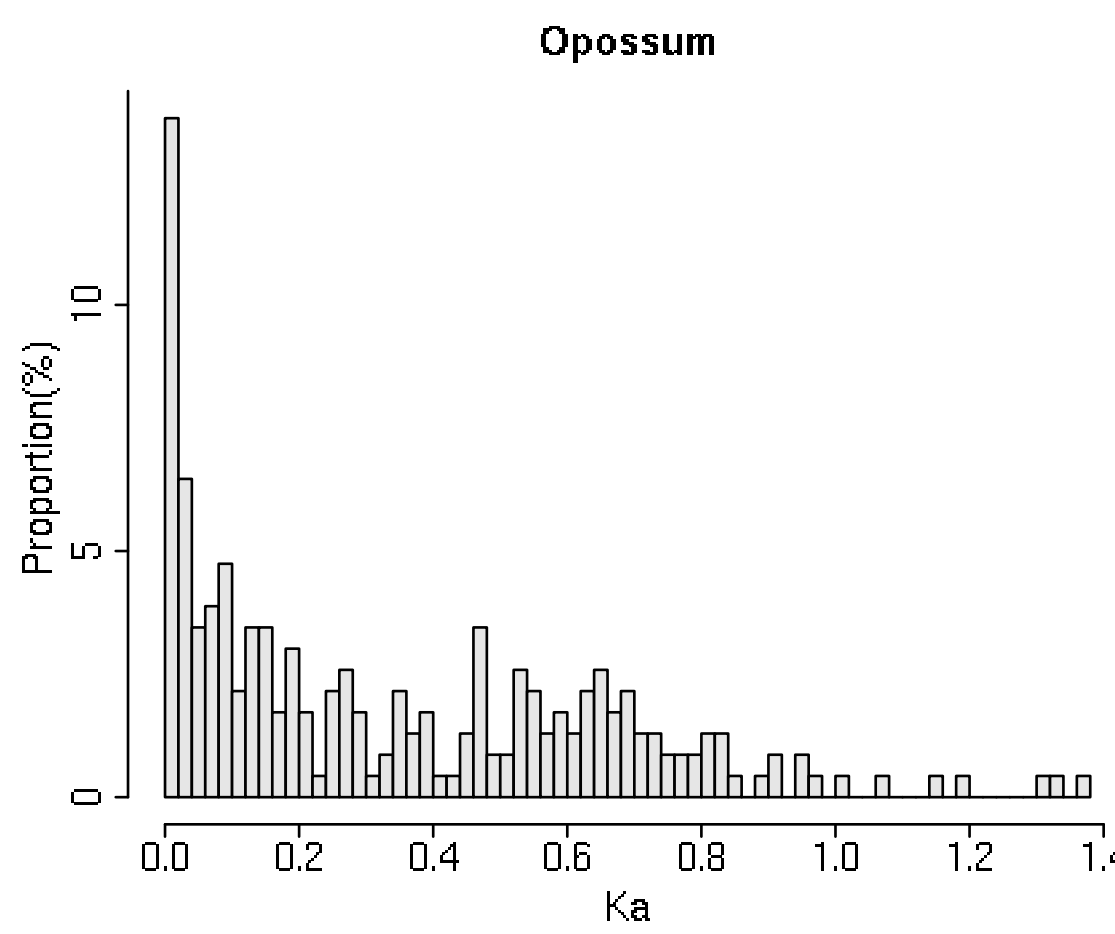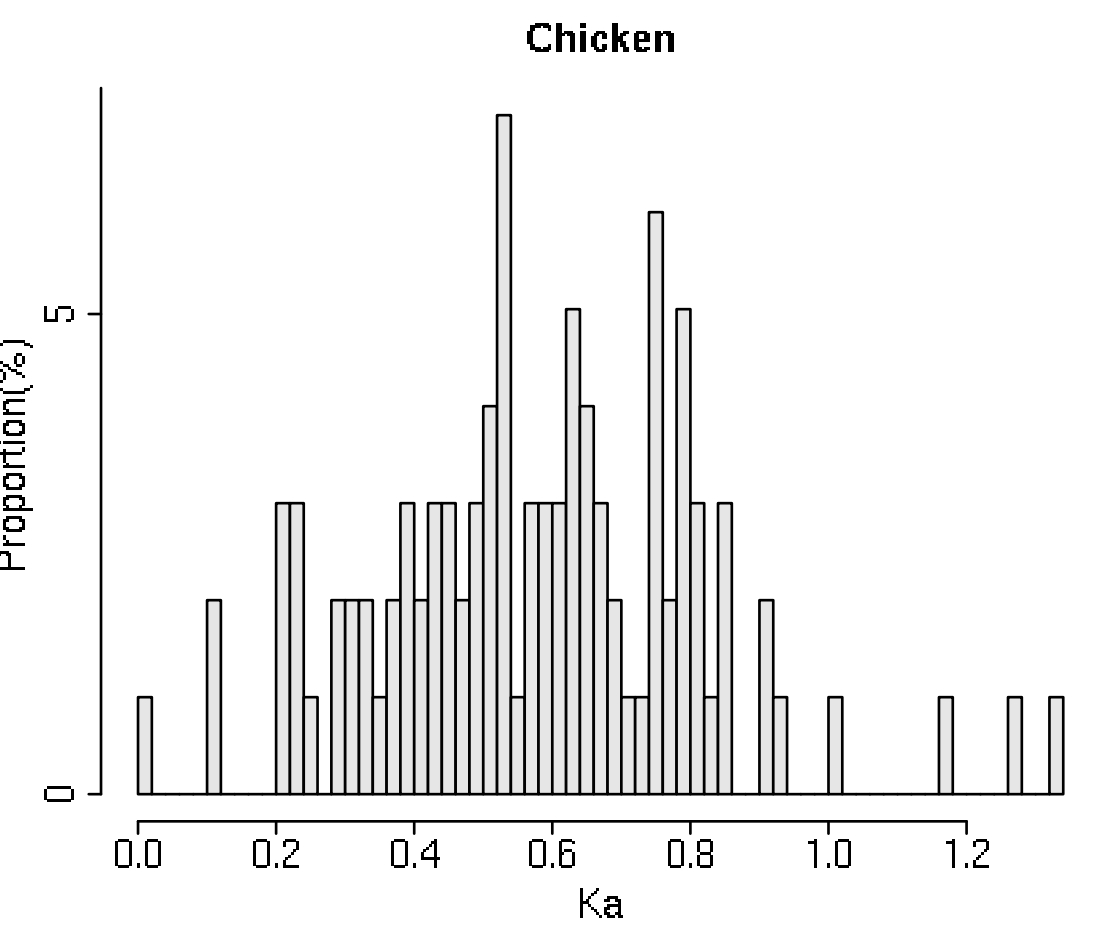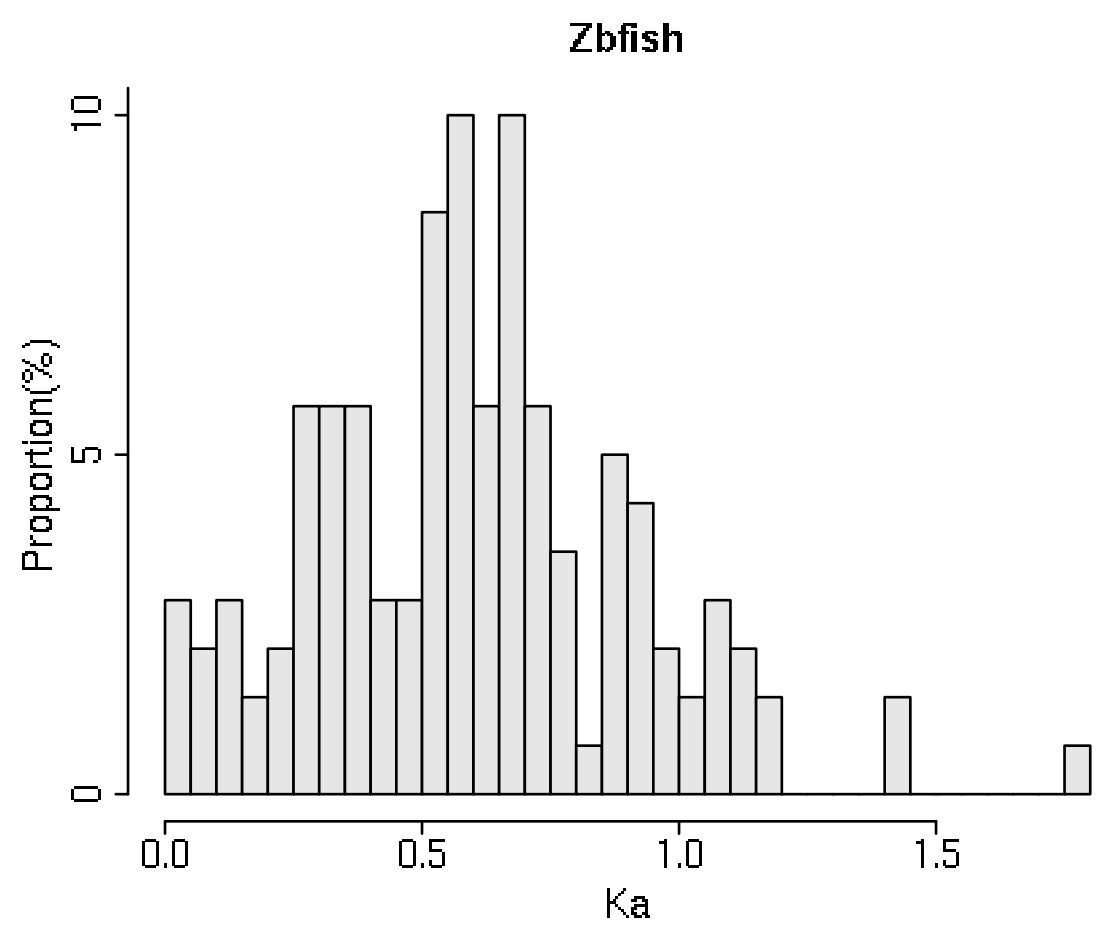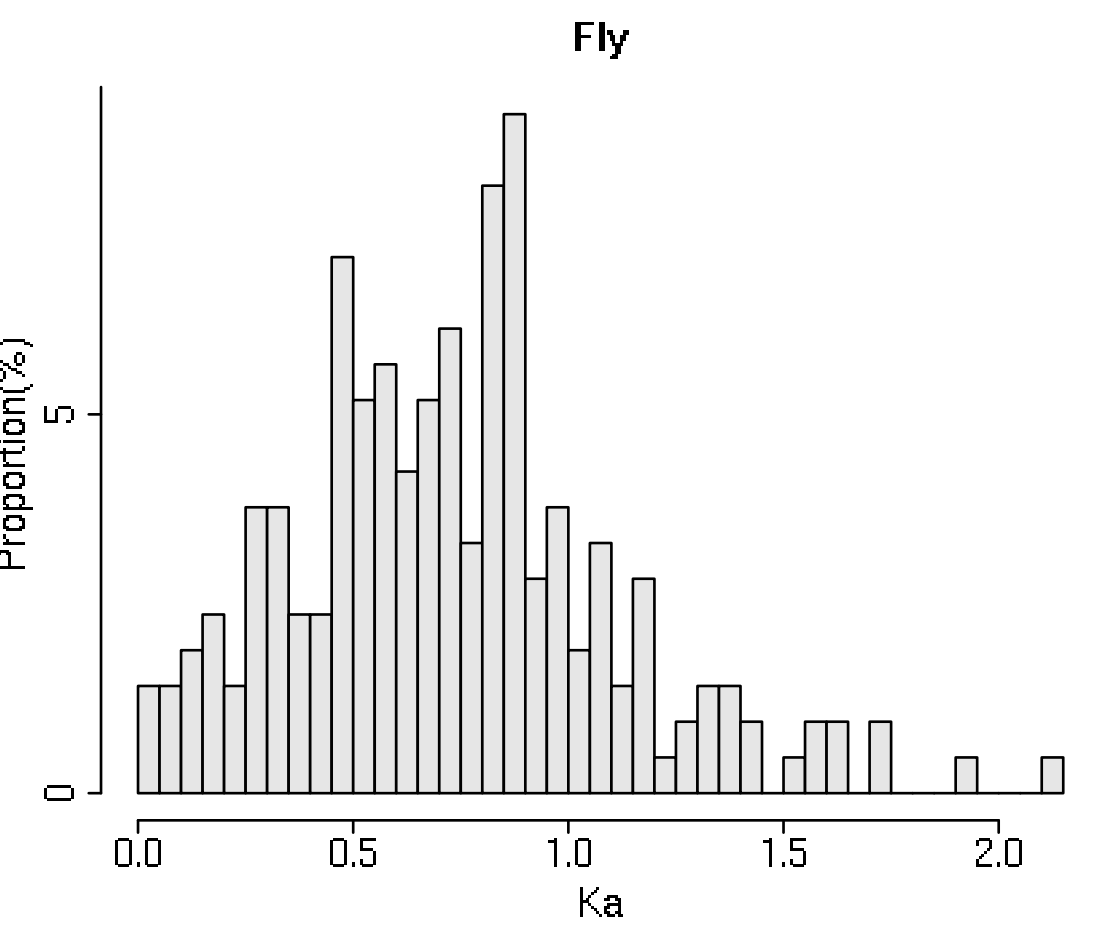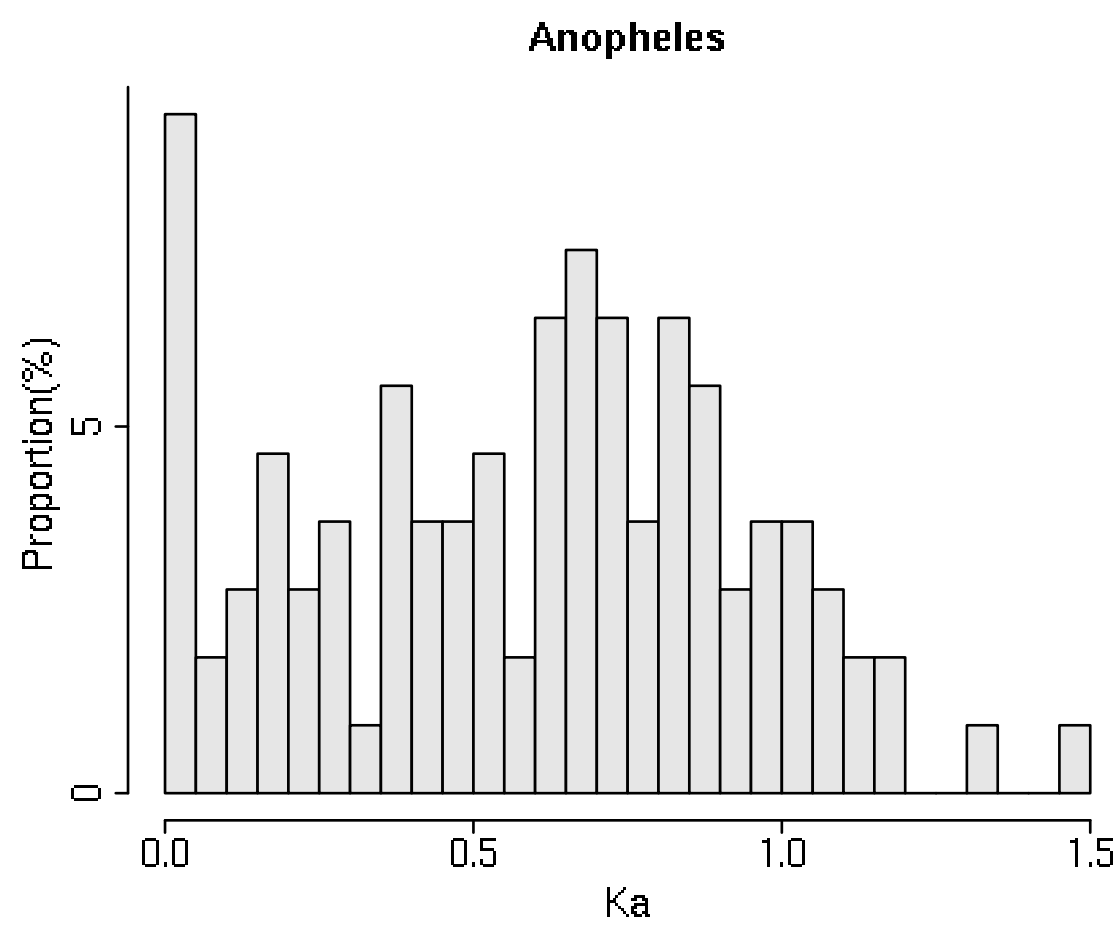

Supplement: pone.0005040.s007.pdf [file pone.0005040.s007.pdf]
