# Supplementary material for: Burst of Young Retrogenes and Independent Retrogene Formation in Mammals
Source: PLoS One. 2009 Mar 27;4(3):e5040. doi: 10.1371/journal.pone.0005040 (PMC2657826; doi:10.1371/journal.pone.0005040)
Supplement: Table S1 — (0.51 MB XLS) [file pone.0005040.s002.xls]

## Sheet: Sheet1
Species	Ensembl Family ID	Parental Ensembl Protein ID	Retrogene Ensembl Protein ID	Parental Ensembl Gene ID	Retrogene Ensembl Gene ID
human	ENSF00000002186	ENSP00000196371	ENSP00000355412	ENSG00000083720	ENSG00000198754
human	ENSF00000000933	ENSP00000219627	ENSP00000341247	ENSG00000103342	ENSG00000189369
human	ENSF00000000627	ENSP00000221444	ENSP00000313622	ENSG00000104848	ENSG00000177272
human	ENSF00000005720	ENSP00000222597	ENSP00000323348	ENSG00000105879	ENSG00000175809
human	ENSF00000003303	ENSP00000225655	ENSP00000351379	ENSG00000108518	ENSG00000196570
human	ENSF00000001311	ENSP00000244043	ENSP00000318867	ENSG00000124212	ENSG00000180432
human	ENSF00000000130	ENSP00000245304	ENSP00000319096	ENSG00000125249	ENSG00000181467
human	ENSF00000001035	ENSP00000245312	ENSP00000368353	ENSG00000125255	ENSG00000205184
human	ENSF00000006499	ENSP00000246006	ENSP00000308117	ENSG00000125810	ENSG00000174807
human	ENSF00000000482	ENSP00000246789	ENSP00000355145	ENSG00000126457	ENSG00000198890
human	ENSF00000001160	ENSP00000250916	ENSP00000310878	ENSG00000129911	ENSG00000174595
human	ENSF00000006295	ENSP00000251152	ENSP00000333522	ENSG00000111707	ENSG00000184550
human	ENSF00000003228	ENSP00000254181	ENSP00000257011	ENSG00000131864	ENSG00000134588
human	ENSF00000000044	ENSP00000254810	ENSP00000339835	ENSG00000132475	ENSG00000188375
human	ENSF00000001327	ENSP00000255499	ENSP00000344489	ENSG00000133135	ENSG00000188050
human	ENSF00000001510	ENSP00000255977	ENSP00000348118	ENSG00000133606	ENSG00000197639
human	ENSF00000002516	ENSP00000257254	ENSP00000301917	ENSG00000134817	ENSG00000170128
human	ENSF00000000256	ENSP00000258301	ENSP00000375085	ENSG00000135823	ENSG00000211584
human	ENSF00000002193	ENSP00000258679	ENSP00000336073	ENSG00000106086	ENSG00000134297
human	ENSF00000000881	ENSP00000258711	ENSP00000307297	ENSG00000136213	ENSG00000169105
human	ENSF00000005603	ENSP00000258774	ENSP00000344216	ENSG00000136273	ENSG00000188996
human	ENSF00000009553	ENSP00000261070	ENSP00000368049	ENSG00000138495	ENSG00000205105
human	ENSF00000001097	ENSP00000261182	ENSP00000334888	ENSG00000187109	ENSG00000186462
human	ENSF00000002623	ENSP00000261574	ENSP00000355322	ENSG00000065150	ENSG00000137040
human	ENSF00000002865	ENSP00000261854	ENSP00000332488	ENSG00000138600	ENSG00000185294
human	ENSF00000002318	ENSP00000262213	ENSP00000309402	ENSG00000067167	ENSG00000174599
human	ENSF00000004555	ENSP00000262238	ENSP00000355023	ENSG00000100811	ENSG00000198767
human	ENSF00000002490	ENSP00000262482	ENSP00000222033	ENSG00000108523	ENSG00000105428
human	ENSF00000000380	ENSP00000262820	ENSP00000352748	ENSG00000003096	ENSG00000198642
human	ENSF00000003780	ENSP00000262850	ENSP00000286334	ENSG00000083750	ENSG00000155876
human	ENSF00000001366	ENSP00000263168	ENSP00000326238	ENSG00000116489	ENSG00000177938
human	ENSF00000004388	ENSP00000263735	ENSP00000327831	ENSG00000119888	ENSG00000184292
human	ENSF00000000140	ENSP00000264552	ENSP00000308752	ENSG00000108106	ENSG00000175091
human	ENSF00000002815	ENSP00000265264	ENSP00000361920	ENSG00000114391	ENSG00000181524
human	ENSF00000000462	ENSP00000266086	ENSP00000370537	ENSG00000100191	ENSG00000198743
human	ENSF00000000999	ENSP00000266458	ENSP00000311718	ENSG00000139112	ENSG00000173683
human	ENSF00000001306	ENSP00000267918	ENSP00000329250	ENSG00000140350	ENSG00000184701
human	ENSF00000000475	ENSP00000271638	ENSP00000242164	ENSG00000163191	ENSG00000122597
human	ENSF00000002553	ENSP00000277865	ENSP00000327589	ENSG00000148672	ENSG00000182890
human	ENSF00000006482	ENSP00000278071	ENSP00000355121	ENSG00000148841	ENSG00000198885
human	ENSF00000000485	ENSP00000280706	ENSP00000302393	ENSG00000166800	ENSG00000171989
human	ENSF00000003594	ENSP00000282570	ENSP00000328301	ENSG00000087338	ENSG00000185005
human	ENSF00000001896	ENSP00000284006	ENSP00000323849	ENSG00000153885	ENSG00000180332
human	ENSF00000005892	ENSP00000285082	ENSP00000330308	ENSG00000154813	ENSG00000183499
human	ENSF00000003219	ENSP00000285420	ENSP00000339389	ENSG00000155100	ENSG00000189401
human	ENSF00000000593	ENSP00000287907	ENSP00000363748	ENSG00000157219	ENSG00000179546
human	ENSF00000002974	ENSP00000292907	ENSP00000226490	ENSG00000161281	ENSG00000109238
human	ENSF00000000111	ENSP00000293308	ENSP00000334513	ENSG00000170421	ENSG00000186080
human	ENSF00000000582	ENSP00000293894	ENSP00000347646	ENSG00000005513	ENSG00000177732
human	ENSF00000001989	ENSP00000296736	ENSP00000302140	ENSG00000164296	ENSG00000171567
human	ENSF00000004894	ENSP00000297146	ENSP00000364615	ENSG00000164604	ENSG00000184194
human	ENSF00000008297	ENSP00000298130	ENSP00000352097	ENSG00000165389	ENSG00000196542
human	ENSF00000001240	ENSP00000300113	ENSP00000342600	ENSG00000166869	ENSG00000188386
human	ENSF00000000270	ENSP00000302894	ENSP00000313447	ENSG00000170144	ENSG00000181836
human	ENSF00000003050	ENSP00000303844	ENSP00000345633	ENSG00000169714	ENSG00000187969
human	ENSF00000002444	ENSP00000304895	ENSP00000247066	ENSG00000169047	ENSG00000133124
human	ENSF00000003575	ENSP00000305596	ENSP00000294829	ENSG00000170613	ENSG00000162771
human	ENSF00000000413	ENSP00000306330	ENSP00000340989	ENSG00000170027	ENSG00000175793
human	ENSF00000001931	ENSP00000307298	ENSP00000269856	ENSG00000169018	ENSG00000141965
human	ENSF00000005189	ENSP00000307858	ENSP00000372635	ENSG00000174282	ENSG00000177311
human	ENSF00000000418	ENSP00000308012	ENSP00000352440	ENSG00000174740	ENSG00000198526
human	ENSF00000002119	ENSP00000308318	ENSP00000255176	ENSG00000173281	ENSG00000132825
human	ENSF00000000396	ENSP00000308576	ENSP00000272233	ENSG00000173156	ENSG00000143878
human	ENSF00000000732	ENSP00000309591	ENSP00000297734	ENSG00000072062	ENSG00000165059
human	ENSF00000000001	ENSP00000311319	ENSP00000330358	ENSG00000173480	ENSG00000183309
human	ENSF00000001527	ENSP00000311427	ENSP00000317332	ENSG00000173548	ENSG00000178996
human	ENSF00000002115	ENSP00000312001	ENSP00000356143	ENSG00000173114	ENSG00000170382
human	ENSF00000000418	ENSP00000313007	ENSP00000281589	ENSG00000070756	ENSG00000151846
human	ENSF00000006619	ENSP00000314806	ENSP00000344023	ENSG00000176302	ENSG00000189299
human	ENSF00000000888	ENSP00000317333	ENSP00000317580	ENSG00000178403	ENSG00000181965
human	ENSF00000003589	ENSP00000318486	ENSP00000304250	ENSG00000176749	ENSG00000171450
human	ENSF00000002371	ENSP00000319170	ENSP00000343033	ENSG00000178700	ENSG00000188985
human	ENSF00000000629	ENSP00000319984	ENSP00000331108	ENSG00000181072	ENSG00000184984
human	ENSF00000000238	ENSP00000323872	ENSP00000362408	ENSG00000176130	ENSG00000178623
human	ENSF00000002414	ENSP00000329295	ENSP00000272641	ENSG00000182575	ENSG00000144227
human	ENSF00000000146	ENSP00000330138	ENSP00000293897	ENSG00000183473	ENSG00000162009
human	ENSF00000000587	ENSP00000331065	ENSP00000349041	ENSG00000182676	ENSG00000198435
human	ENSF00000001869	ENSP00000331305	ENSP00000268957	ENSG00000183864	ENSG00000141232
human	ENSF00000000001	ENSP00000331540	ENSP00000347611	ENSG00000171827	ENSG00000196922
human	ENSF00000000202	ENSP00000331698	ENSP00000345708	ENSG00000157551	ENSG00000187486
human	ENSF00000001129	ENSP00000332591	ENSP00000239032	ENSG00000185149	ENSG00000119973
human	ENSF00000000251	ENSP00000333836	ENSP00000349356	ENSG00000182263	ENSG00000132436
human	ENSF00000002465	ENSP00000333917	ENSP00000367269	ENSG00000167065	ENSG00000189037
human	ENSF00000002324	ENSP00000335272	ENSP00000253255	ENSG00000187008	ENSG00000130943
human	ENSF00000006679	ENSP00000335376	ENSP00000361529	ENSG00000116990	ENSG00000204053
human	ENSF00000003694	ENSP00000335397	ENSP00000330631	ENSG00000186907	ENSG00000185924
human	ENSF00000003353	ENSP00000337222	ENSP00000322054	ENSG00000179820	ENSG00000181250
human	ENSF00000000113	ENSP00000338611	ENSP00000323847	ENSG00000136447	ENSG00000179674
human	ENSF00000001864	ENSP00000339051	ENSP00000324208	ENSG00000133112	ENSG00000198359
human	ENSF00000003451	ENSP00000339207	ENSP00000366492	ENSG00000156504	ENSG00000187866
human	ENSF00000000402	ENSP00000342267	ENSP00000239451	ENSG00000102743	ENSG00000120329
human	ENSF00000000244	ENSP00000343676	ENSP00000241125	ENSG00000187513	ENSG00000121743
human	ENSF00000000354	ENSP00000343782	ENSP00000305372	ENSG00000188778	ENSG00000169252
human	ENSF00000000245	ENSP00000347745	ENSP00000366042	ENSG00000198579	ENSG00000204635
human	ENSF00000001821	ENSP00000348062	ENSP00000295266	ENSG00000131828	ENSG00000163114
human	ENSF00000002323	ENSP00000349212	ENSP00000352719	ENSG00000196531	ENSG00000196861
human	ENSF00000000018	ENSP00000349960	ENSP00000365045	ENSG00000075624	ENSG00000204434
human	ENSF00000004878	ENSP00000350386	ENSP00000355511	ENSG00000188419	ENSG00000203668
human	ENSF00000000153	ENSP00000350638	ENSP00000319956	ENSG00000198403	ENSG00000176668
human	ENSF00000000263	ENSP00000351446	ENSP00000330381	ENSG00000196363	ENSG00000196981
human	ENSF00000005604	ENSP00000351642	ENSP00000318128	ENSG00000124243	ENSG00000186222
human	ENSF00000001186	ENSP00000352143	ENSP00000345806	ENSG00000177576	ENSG00000183302
human	ENSF00000000916	ENSP00000352438	ENSP00000305556	ENSG00000197111	ENSG00000169564
human	ENSF00000000001	ENSP00000352770	ENSP00000345511	ENSG00000197008	ENSG00000197332
human	ENSF00000000364	ENSP00000354607	ENSP00000315042	ENSG00000163251	ENSG00000177283
human	ENSF00000001129	ENSP00000354652	ENSP00000290426	ENSG00000164128	ENSG00000159279
human	ENSF00000006296	ENSP00000354676	ENSP00000340629	ENSG00000198856	ENSG00000188276
human	ENSF00000001639	ENSP00000355187	ENSP00000274711	ENSG00000198739	ENSG00000146006
human	ENSF00000000245	ENSP00000355308	ENSP00000368386	ENSG00000165996	ENSG00000205188
human	ENSF00000002690	ENSP00000355568	ENSP00000238647	ENSG00000168264	ENSG00000119669
human	ENSF00000000018	ENSP00000355645	ENSP00000277242	ENSG00000143632	ENSG00000148156
human	ENSF00000005713	ENSP00000356809	ENSP00000298110	ENSG00000143147	ENSG00000165370
human	ENSF00000003168	ENSP00000356953	ENSP00000226102	ENSG00000143252	ENSG00000108958
human	ENSF00000001185	ENSP00000357189	ENSP00000230012	ENSG00000143321	ENSG00000112273
human	ENSF00000000938	ENSP00000357345	ENSP00000371405	ENSG00000176444	ENSG00000178340
human	ENSF00000002627	ENSP00000357906	ENSP00000274456	ENSG00000163154	ENSG00000145779
human	ENSF00000001368	ENSP00000358525	ENSP00000328738	ENSG00000134259	ENSG00000185652
human	ENSF00000000593	ENSP00000358597	ENSP00000322924	ENSG00000168830	ENSG00000179097
human	ENSF00000006929	ENSP00000358667	ENSP00000334044	ENSG00000102178	ENSG00000186150
human	ENSF00000003131	ENSP00000358799	ENSP00000313890	ENSG00000162775	ENSG00000179837
human	ENSF00000006327	ENSP00000358875	ENSP00000319250	ENSG00000156097	ENSG00000180929
human	ENSF00000004675	ENSP00000358878	ENSP00000323096	ENSG00000181754	ENSG00000176020
human	ENSF00000002009	ENSP00000358931	ENSP00000280605	ENSG00000007350	ENSG00000151005
human	ENSF00000000134	ENSP00000359300	ENSP00000319052	ENSG00000147400	ENSG00000177143
human	ENSF00000000229	ENSP00000359361	ENSP00000368667	ENSG00000080007	ENSG00000184735
human	ENSF00000005421	ENSP00000359449	ENSP00000314309	ENSG00000155984	ENSG00000179724
human	ENSF00000001170	ENSP00000359645	ENSP00000304139	ENSG00000147274	ENSG00000170748
human	ENSF00000000001	ENSP00000359802	ENSP00000354703	ENSG00000186376	ENSG00000198816
human	ENSF00000000380	ENSP00000359942	ENSP00000330683	ENSG00000124743	ENSG00000185915
human	ENSF00000003145	ENSP00000360090	ENSP00000367361	ENSG00000156697	ENSG00000136112
human	ENSF00000004477	ENSP00000360464	ENSP00000345716	ENSG00000101882	ENSG00000189134
human	ENSF00000000381	ENSP00000360626	ENSP00000295082	ENSG00000026559	ENSG00000162975
human	ENSF00000001689	ENSP00000360664	ENSP00000336233	ENSG00000134717	ENSG00000174991
human	ENSF00000000018	ENSP00000360954	ENSP00000306469	ENSG00000107796	ENSG00000169067
human	ENSF00000001610	ENSP00000360973	ENSP00000216629	ENSG00000180772	ENSG00000100739
human	ENSF00000001029	ENSP00000361298	ENSP00000268919	ENSG00000142945	ENSG00000141200
human	ENSF00000000663	ENSP00000361512	ENSP00000283289	ENSG00000147224	ENSG00000153287
human	ENSF00000000134	ENSP00000361636	ENSP00000315299	ENSG00000101470	ENSG00000178363
human	ENSF00000003635	ENSP00000361998	ENSP00000312709	ENSG00000102387	ENSG00000178913
human	ENSF00000002326	ENSP00000362063	ENSP00000325616	ENSG00000101811	ENSG00000177613
human	ENSF00000001206	ENSP00000362413	ENSP00000305995	ENSG00000102144	ENSG00000170950
human	ENSF00000003249	ENSP00000363015	ENSP00000362131	ENSG00000117748	ENSG00000204086
human	ENSF00000003826	ENSP00000363136	ENSP00000357936	ENSG00000181773	ENSG00000146360
human	ENSF00000000537	ENSP00000363524	ENSP00000332546	ENSG00000090889	ENSG00000184732
human	ENSF00000001747	ENSP00000363596	ENSP00000358511	ENSG00000188822	ENSG00000118432
human	ENSF00000000001	ENSP00000363772	ENSP00000373874	ENSG00000175395	ENSG00000180626
human	ENSF00000001141	ENSP00000364190	ENSP00000372571	ENSG00000204304	ENSG00000181814
human	ENSF00000000532	ENSP00000364430	ENSP00000302812	ENSG00000204335	ENSG00000170374
human	ENSF00000002606	ENSP00000364519	ENSP00000351441	ENSG00000198176	ENSG00000183434
human	ENSF00000000034	ENSP00000364805	ENSP00000356947	ENSG00000204390	ENSG00000173110
human	ENSF00000004809	ENSP00000365002	ENSP00000329892	ENSG00000204427	ENSG00000183260
human	ENSF00000001114	ENSP00000365019	ENSP00000335008	ENSG00000106723	ENSG00000204271
human	ENSF00000001345	ENSP00000365576	ENSP00000345195	ENSG00000135018	ENSG00000188021
human	ENSF00000000245	ENSP00000366539	ENSP00000347858	ENSG00000204758	ENSG00000188426
human	ENSF00000001484	ENSP00000366911	ENSP00000307197	ENSG00000105993	ENSG00000172404
human	ENSF00000000317	ENSP00000367072	ENSP00000322723	ENSG00000113712	ENSG00000180138
human	ENSF00000001026	ENSP00000368226	ENSP00000302036	ENSG00000198814	ENSG00000170095
human	ENSF00000005830	ENSP00000368242	ENSP00000317691	ENSG00000164967	ENSG00000178718
human	ENSF00000003207	ENSP00000368858	ENSP00000339307	ENSG00000137210	ENSG00000189156
human	ENSF00000010699	ENSP00000370533	ENSP00000355355	ENSG00000205670	ENSG00000198738
human	ENSF00000001049	ENSP00000370569	ENSP00000354395	ENSG00000122026	ENSG00000164069
human	ENSF00000000737	ENSP00000371515	ENSP00000330035	ENSG00000205852	ENSG00000182289
human	ENSF00000000095	ENSP00000374016	ENSP00000319546	ENSG00000211458	ENSG00000180658
mouse	ENSF00000000608	ENSMUSP00000000804	ENSMUSP00000035261	ENSMUSG00000000787	ENSMUSG00000039224
mouse	ENSF00000000418	ENSMUSP00000001809	ENSMUSP00000066639	ENSMUSG00000022283	ENSMUSG00000051732
mouse	ENSF00000001844	ENSMUSP00000002289	ENSMUSP00000045208	ENSMUSG00000022111	ENSMUSG00000035337
mouse	ENSF00000000823	ENSMUSP00000004327	ENSMUSP00000051649	ENSMUSG00000031400	ENSMUSG00000045120
mouse	ENSF00000000302	ENSMUSP00000004964	ENSMUSP00000077354	ENSMUSG00000004842	ENSMUSG00000056854
mouse	ENSF00000001185	ENSMUSP00000005017	ENSMUSP00000057557	ENSMUSG00000004897	ENSMUSG00000045835
mouse	ENSF00000003165	ENSMUSP00000005714	ENSMUSP00000071728	ENSMUSG00000005575	ENSMUSG00000059301
mouse	ENSF00000004809	ENSMUSP00000007251	ENSMUSP00000066520	ENSMUSG00000007036	ENSMUSG00000055882
mouse	ENSF00000000217	ENSMUSP00000007624	ENSMUSP00000047358	ENSMUSG00000007480	ENSMUSG00000038537
mouse	ENSF00000000790	ENSMUSP00000009097	ENSMUSP00000093124	ENSMUSG00000044533	ENSMUSG00000075515
mouse	ENSF00000002361	ENSMUSP00000009157	ENSMUSP00000077564	ENSMUSG00000009013	ENSMUSG00000064063
mouse	ENSF00000003635	ENSMUSP00000009740	ENSMUSP00000096867	ENSMUSG00000009596	ENSMUSG00000074734
mouse	ENSF00000000583	ENSMUSP00000014447	ENSMUSP00000070591	ENSMUSG00000014303	ENSMUSG00000051835
mouse	ENSF00000007476	ENSMUSP00000015816	ENSMUSP00000093822	ENSMUSG00000015672	ENSMUSG00000057223
mouse	ENSF00000004477	ENSMUSP00000016553	ENSMUSP00000065168	ENSMUSG00000016409	ENSMUSG00000059395
mouse	ENSF00000005310	ENSMUSP00000016763	ENSMUSP00000087515	ENSMUSG00000016619	ENSMUSG00000072878
mouse	ENSF00000003303	ENSMUSP00000018437	ENSMUSP00000054053	ENSMUSG00000018293	ENSMUSG00000044444
mouse	ENSF00000000413	ENSMUSP00000019109	ENSMUSP00000050374	ENSMUSG00000018965	ENSMUSG00000047281
mouse	ENSF00000000735	ENSMUSP00000021562	ENSMUSP00000092281	ENSMUSG00000021134	ENSMUSG00000070729
mouse	ENSF00000000354	ENSMUSP00000021932	ENSMUSP00000039691	ENSMUSG00000021478	ENSMUSG00000039358
mouse	ENSF00000003789	ENSMUSP00000023407	ENSMUSP00000057984	ENSMUSG00000022724	ENSMUSG00000046791
mouse	ENSF00000001663	ENSMUSP00000023434	ENSMUSP00000037476	ENSMUSG00000022753	ENSMUSG00000034435
mouse	ENSF00000005964	ENSMUSP00000023525	ENSMUSP00000096977	ENSMUSG00000022828	ENSMUSG00000074804
mouse	ENSF00000000251	ENSMUSP00000024869	ENSMUSP00000097651	ENSMUSG00000024068	ENSMUSG00000075324
mouse	ENSF00000002062	ENSMUSP00000024897	ENSMUSP00000049859	ENSMUSG00000024091	ENSMUSG00000046487
mouse	ENSF00000001072	ENSMUSP00000025696	ENSMUSP00000049761	ENSMUSG00000024782	ENSMUSG00000049213
mouse	ENSF00000001026	ENSMUSP00000026039	ENSMUSP00000067598	ENSMUSG00000025059	ENSMUSG00000053624
mouse	ENSF00000003411	ENSMUSP00000026125	ENSMUSP00000080242	ENSMUSG00000025134	ENSMUSG00000060244
mouse	ENSF00000004393	ENSMUSP00000026153	ENSMUSP00000055703	ENSMUSG00000025156	ENSMUSG00000047016
mouse	ENSF00000002636	ENSMUSP00000026324	ENSMUSP00000051333	ENSMUSG00000025287	ENSMUSG00000047565
mouse	ENSF00000003183	ENSMUSP00000026599	ENSMUSP00000059137	ENSMUSG00000025525	ENSMUSG00000049233
mouse	ENSF00000002538	ENSMUSP00000026704	ENSMUSP00000044932	ENSMUSG00000025613	ENSMUSG00000038044
mouse	ENSF00000002818	ENSMUSP00000027973	ENSMUSP00000081009	ENSMUSG00000026662	ENSMUSG00000049091
mouse	ENSF00000000263	ENSMUSP00000028281	ENSMUSP00000040852	ENSMUSG00000026917	ENSMUSG00000034379
mouse	ENSF00000006499	ENSMUSP00000028923	ENSMUSP00000070847	ENSMUSG00000027435	ENSMUSG00000056481
mouse	ENSF00000000888	ENSMUSP00000029587	ENSMUSP00000050484	ENSMUSG00000027967	ENSMUSG00000048904
mouse	ENSF00000018172	ENSMUSP00000030114	ENSMUSP00000082978	ENSMUSG00000028407	ENSMUSG00000063611
mouse	ENSF00000008016	ENSMUSP00000031304	ENSMUSP00000064132	ENSMUSG00000029359	ENSMUSG00000055826
mouse	ENSF00000002428	ENSMUSP00000031383	ENSMUSP00000096444	ENSMUSG00000029430	ENSMUSG00000050363
mouse	ENSF00000000396	ENSMUSP00000031401	ENSMUSP00000067013	ENSMUSG00000029449	ENSMUSG00000054364
mouse	ENSF00000001510	ENSMUSP00000031985	ENSMUSP00000091898	ENSMUSG00000029922	ENSMUSG00000070527
mouse	ENSF00000010230	ENSMUSP00000032133	ENSMUSP00000059270	ENSMUSG00000030054	ENSMUSG00000050761
mouse	ENSF00000003050	ENSMUSP00000032138	ENSMUSP00000033692	ENSMUSG00000030057	ENSMUSG00000031330
mouse	ENSF00000000643	ENSMUSP00000032934	ENSMUSP00000077687	ENSMUSG00000030695	ENSMUSG00000059343
mouse	ENSF00000008748	ENSMUSP00000033373	ENSMUSP00000074190	ENSMUSG00000031059	ENSMUSG00000061633
mouse	ENSF00000001170	ENSMUSP00000033470	ENSMUSP00000095739	ENSMUSG00000031134	ENSMUSG00000073894
mouse	ENSF00000005364	ENSMUSP00000033570	ENSMUSP00000050818	ENSMUSG00000031221	ENSMUSG00000046717
mouse	ENSF00000002326	ENSMUSP00000033609	ENSMUSP00000093831	ENSMUSG00000031256	ENSMUSG00000053536
mouse	ENSF00000001821	ENSMUSP00000033662	ENSMUSP00000060774	ENSMUSG00000031299	ENSMUSG00000047674
mouse	ENSF00000001620	ENSMUSP00000033736	ENSMUSP00000062025	ENSMUSG00000031370	ENSMUSG00000044068
mouse	ENSF00000000402	ENSMUSP00000033871	ENSMUSP00000052849	ENSMUSG00000031482	ENSMUSG00000050304
mouse	ENSF00000000202	ENSMUSP00000034533	ENSMUSP00000091979	ENSMUSG00000032034	ENSMUSG00000070561
mouse	ENSF00000001931	ENSMUSP00000034775	ENSMUSP00000057996	ENSMUSG00000032244	ENSMUSG00000043683
mouse	ENSF00000004836	ENSMUSP00000035075	ENSMUSP00000088017	ENSMUSG00000032494	ENSMUSG00000063911
mouse	ENSF00000000496	ENSMUSP00000035486	ENSMUSP00000098768	ENSMUSG00000034108	ENSMUSG00000072941
mouse	ENSF00000000253	ENSMUSP00000036384	ENSMUSP00000095832	ENSMUSG00000033220	ENSMUSG00000073982
mouse	ENSF00000002490	ENSMUSP00000036472	ENSMUSP00000059715	ENSMUSG00000040746	ENSMUSG00000044526
mouse	ENSF00000003780	ENSMUSP00000039013	ENSMUSP00000088591	ENSMUSG00000041658	ENSMUSG00000070934
mouse	ENSF00000000532	ENSMUSP00000039307	ENSMUSP00000077596	ENSMUSG00000038560	ENSMUSG00000060284
mouse	ENSF00000000058	ENSMUSP00000039519	ENSMUSP00000022708	ENSMUSG00000035191	ENSMUSG00000022113
mouse	ENSF00000001029	ENSMUSP00000039687	ENSMUSP00000058084	ENSMUSG00000021693	ENSMUSG00000046755
mouse	ENSF00000000455	ENSMUSP00000039985	ENSMUSP00000053027	ENSMUSG00000036587	ENSMUSG00000049307
mouse	ENSF00000000336	ENSMUSP00000041343	ENSMUSP00000097096	ENSMUSG00000034780	ENSMUSG00000074892
mouse	ENSF00000005830	ENSMUSP00000041477	ENSMUSP00000079358	ENSMUSG00000036114	ENSMUSG00000062309
mouse	ENSF00000000202	ENSMUSP00000041696	ENSMUSP00000054356	ENSMUSG00000042529	ENSMUSG00000044708
mouse	ENSF00000000629	ENSMUSP00000042632	ENSMUSP00000040808	ENSMUSG00000032773	ENSMUSG00000040495
mouse	ENSF00000005465	ENSMUSP00000042762	ENSMUSP00000050737	ENSMUSG00000036167	ENSMUSG00000050528
mouse	ENSF00000001312	ENSMUSP00000043101	ENSMUSP00000082207	ENSMUSG00000033777	ENSMUSG00000045322
mouse	ENSF00000002336	ENSMUSP00000043336	ENSMUSP00000092401	ENSMUSG00000041716	ENSMUSG00000070802
mouse	ENSF00000001035	ENSMUSP00000045150	ENSMUSP00000077808	ENSMUSG00000032806	ENSMUSG00000058921
mouse	ENSF00000000881	ENSMUSP00000045349	ENSMUSP00000064897	ENSMUSG00000034612	ENSMUSG00000056643
mouse	ENSF00000000182	ENSMUSP00000045993	ENSMUSP00000054158	ENSMUSG00000037169	ENSMUSG00000044597
mouse	ENSF00000000202	ENSMUSP00000046793	ENSMUSP00000056746	ENSMUSG00000041248	ENSMUSG00000051497
mouse	ENSF00000004138	ENSMUSP00000047530	ENSMUSP00000053223	ENSMUSG00000040715	ENSMUSG00000047619
mouse	ENSF00000002318	ENSMUSP00000047992	ENSMUSP00000062635	ENSMUSG00000041779	ENSMUSG00000044528
mouse	ENSF00000008588	ENSMUSP00000048754	ENSMUSP00000027230	ENSMUSG00000042433	ENSMUSG00000026063
mouse	ENSF00000000364	ENSMUSP00000049852	ENSMUSP00000053551	ENSMUSG00000049791	ENSMUSG00000049551
mouse	ENSF00000002324	ENSMUSP00000051512	ENSMUSP00000086352	ENSMUSG00000048827	ENSMUSG00000052496
mouse	ENSF00000009523	ENSMUSP00000051583	ENSMUSP00000097570	ENSMUSG00000047844	ENSMUSG00000075269
mouse	ENSF00000000592	ENSMUSP00000051895	ENSMUSP00000060169	ENSMUSG00000047953	ENSMUSG00000046070
mouse	ENSF00000001639	ENSMUSP00000052604	ENSMUSP00000089225	ENSMUSG00000042846	ENSMUSG00000071862
mouse	ENSF00000002552	ENSMUSP00000052737	ENSMUSP00000057106	ENSMUSG00000045493	ENSMUSG00000045591
mouse	ENSF00000000336	ENSMUSP00000053528	ENSMUSP00000031384	ENSMUSG00000051650	ENSMUSG00000029431
mouse	ENSF00000003464	ENSMUSP00000053840	ENSMUSP00000062158	ENSMUSG00000050587	ENSMUSG00000049939
mouse	ENSF00000000188	ENSMUSP00000054219	ENSMUSP00000051887	ENSMUSG00000047230	ENSMUSG00000050520
mouse	ENSF00000004973	ENSMUSP00000054337	ENSMUSP00000047776	ENSMUSG00000051373	ENSMUSG00000040105
mouse	ENSF00000003131	ENSMUSP00000054424	ENSMUSP00000059330	ENSMUSG00000048109	ENSMUSG00000045365
mouse	ENSF00000000556	ENSMUSP00000054469	ENSMUSP00000050412	ENSMUSG00000045087	ENSMUSG00000044199
mouse	ENSF00000004180	ENSMUSP00000054881	ENSMUSP00000058424	ENSMUSG00000038412	ENSMUSG00000044330
mouse	ENSF00000000381	ENSMUSP00000055091	ENSMUSP00000061409	ENSMUSG00000047298	ENSMUSG00000051726
mouse	ENSF00000000888	ENSMUSP00000055493	ENSMUSP00000039801	ENSMUSG00000052271	ENSMUSG00000036816
mouse	ENSF00000006327	ENSMUSP00000055557	ENSMUSP00000068796	ENSMUSG00000046793	ENSMUSG00000053970
mouse	ENSF00000000130	ENSMUSP00000056433	ENSMUSP00000038841	ENSMUSG00000051615	ENSMUSG00000036894
mouse	ENSF00000001129	ENSMUSP00000056576	ENSMUSP00000063114	ENSMUSG00000048337	ENSMUSG00000045052
mouse	ENSF00000008163	ENSMUSP00000056641	ENSMUSP00000055403	ENSMUSG00000024317	ENSMUSG00000051139
mouse	ENSF00000001989	ENSMUSP00000057223	ENSMUSP00000052320	ENSMUSG00000049232	ENSMUSG00000047819
mouse	ENSF00000002465	ENSMUSP00000057346	ENSMUSP00000026018	ENSMUSG00000047205	ENSMUSG00000025043
mouse	ENSF00000011240	ENSMUSP00000057687	ENSMUSP00000054958	ENSMUSG00000048573	ENSMUSG00000047995
mouse	ENSF00000003061	ENSMUSP00000059404	ENSMUSP00000055596	ENSMUSG00000043991	ENSMUSG00000049647
mouse	ENSF00000004675	ENSMUSP00000059913	ENSMUSP00000082137	ENSMUSG00000048218	ENSMUSG00000032593
mouse	ENSF00000001060	ENSMUSP00000061305	ENSMUSP00000032094	ENSMUSG00000043556	ENSMUSG00000030019
mouse	ENSF00000000064	ENSMUSP00000061355	ENSMUSP00000062783	ENSMUSG00000044145	ENSMUSG00000047654
mouse	ENSF00000006948	ENSMUSP00000061370	ENSMUSP00000068770	ENSMUSG00000005078	ENSMUSG00000056197
mouse	ENSF00000004388	ENSMUSP00000061935	ENSMUSP00000060099	ENSMUSG00000045394	ENSMUSG00000051397
mouse	ENSF00000003826	ENSMUSP00000062083	ENSMUSP00000057323	ENSMUSG00000049649	ENSMUSG00000046922
mouse	ENSF00000000896	ENSMUSP00000062096	ENSMUSP00000074381	ENSMUSG00000051498	ENSMUSG00000062545
mouse	ENSF00000002690	ENSMUSP00000062753	ENSMUSP00000061234	ENSMUSG00000051495	ENSMUSG00000044030
mouse	ENSF00000000593	ENSMUSP00000063136	ENSMUSP00000050898	ENSMUSG00000050783	ENSMUSG00000049511
mouse	ENSF00000002444	ENSMUSP00000063795	ENSMUSP00000038514	ENSMUSG00000055980	ENSMUSG00000038894
mouse	ENSF00000002760	ENSMUSP00000064129	ENSMUSP00000072920	ENSMUSG00000056612	ENSMUSG00000073730
mouse	ENSF00000004316	ENSMUSP00000064466	ENSMUSP00000017126	ENSMUSG00000053293	ENSMUSG00000016982
mouse	ENSF00000004894	ENSMUSP00000065533	ENSMUSP00000098680	ENSMUSG00000056679	ENSMUSG00000072875
mouse	ENSF00000005822	ENSMUSP00000066210	ENSMUSP00000076724	ENSMUSG00000055839	ENSMUSG00000057534
mouse	ENSF00000000244	ENSMUSP00000066901	ENSMUSP00000061742	ENSMUSG00000034520	ENSMUSG00000051056
mouse	ENSF00000002662	ENSMUSP00000067385	ENSMUSP00000069765	ENSMUSG00000056155	ENSMUSG00000051965
mouse	ENSF00000000364	ENSMUSP00000067783	ENSMUSP00000039660	ENSMUSG00000045005	ENSMUSG00000036904
mouse	ENSF00000001610	ENSMUSP00000068298	ENSMUSP00000045335	ENSMUSG00000054988	ENSMUSG00000041347
mouse	ENSF00000005142	ENSMUSP00000068643	ENSMUSP00000035271	ENSMUSG00000039405	ENSMUSG00000033491
mouse	ENSF00000001437	ENSMUSP00000068927	ENSMUSP00000096129	ENSMUSG00000052435	ENSMUSG00000034957
mouse	ENSF00000003451	ENSMUSP00000069112	ENSMUSP00000097152	ENSMUSG00000036022	ENSMUSG00000074922
mouse	ENSF00000003228	ENSMUSP00000069140	ENSMUSP00000062349	ENSMUSG00000055780	ENSMUSG00000051527
mouse	ENSF00000005603	ENSMUSP00000069739	ENSMUSP00000100007	ENSMUSG00000020413	ENSMUSG00000076430
mouse	ENSF00000001366	ENSMUSP00000069798	ENSMUSP00000038562	ENSMUSG00000055357	ENSMUSG00000041791
mouse	ENSF00000001858	ENSMUSP00000071636	ENSMUSP00000054562	ENSMUSG00000026701	ENSMUSG00000050114
mouse	ENSF00000002627	ENSMUSP00000073673	ENSMUSP00000096356	ENSMUSG00000062210	ENSMUSG00000074345
mouse	ENSF00000005454	ENSMUSP00000073778	ENSMUSP00000046475	ENSMUSG00000026554	ENSMUSG00000035395
mouse	ENSF00000003359	ENSMUSP00000074724	ENSMUSP00000058687	ENSMUSG00000073676	ENSMUSG00000049246
mouse	ENSF00000003338	ENSMUSP00000074872	ENSMUSP00000050015	ENSMUSG00000046027	ENSMUSG00000045048
mouse	ENSF00000000880	ENSMUSP00000075692	ENSMUSP00000046593	ENSMUSG00000058254	ENSMUSG00000042668
mouse	ENSF00000000238	ENSMUSP00000075720	ENSMUSP00000063520	ENSMUSG00000033470	ENSMUSG00000052821
mouse	ENSF00000000916	ENSMUSP00000076294	ENSMUSP00000054863	ENSMUSG00000056851	ENSMUSG00000051695
mouse	ENSF00000005302	ENSMUSP00000077378	ENSMUSP00000096105	ENSMUSG00000062632	ENSMUSG00000074158
mouse	ENSF00000000001	ENSMUSP00000077759	ENSMUSP00000091282	ENSMUSG00000070605	ENSMUSG00000072915
mouse	ENSF00000002883	ENSMUSP00000077889	ENSMUSP00000059258	ENSMUSG00000060791	ENSMUSG00000049365
mouse	ENSF00000000113	ENSMUSP00000079246	ENSMUSP00000029354	ENSMUSG00000060904	ENSMUSG00000027783
mouse	ENSF00000000354	ENSMUSP00000080162	ENSMUSP00000062256	ENSMUSG00000031489	ENSMUSG00000045730
mouse	ENSF00000001969	ENSMUSP00000081007	ENSMUSP00000094864	ENSMUSG00000034785	ENSMUSG00000075707
mouse	ENSF00000001311	ENSMUSP00000085357	ENSMUSP00000052989	ENSMUSG00000017969	ENSMUSG00000050445
mouse	ENSF00000005302	ENSMUSP00000091177	ENSMUSP00000071329	ENSMUSG00000057924	ENSMUSG00000060149
mouse	ENSF00000013752	ENSMUSP00000091219	ENSMUSP00000095275	ENSMUSG00000062783	ENSMUSG00000073632
mouse	ENSF00000000979	ENSMUSP00000091318	ENSMUSP00000058032	ENSMUSG00000032369	ENSMUSG00000047306
mouse	ENSF00000000364	ENSMUSP00000091463	ENSMUSP00000058629	ENSMUSG00000050288	ENSMUSG00000044674
mouse	ENSF00000006138	ENSMUSP00000091487	ENSMUSP00000020780	ENSMUSG00000020485	ENSMUSG00000075260
mouse	ENSF00000000336	ENSMUSP00000092277	ENSMUSP00000084823	ENSMUSG00000059479	ENSMUSG00000067370
mouse	ENSF00000018177	ENSMUSP00000094099	ENSMUSP00000073250	ENSMUSG00000071726	ENSMUSG00000059695
mouse	ENSF00000000967	ENSMUSP00000095779	ENSMUSP00000098825	ENSMUSG00000073929	ENSMUSG00000072993
mouse	ENSF00000001365	ENSMUSP00000095990	ENSMUSP00000082109	ENSMUSG00000062867	ENSMUSG00000071041
mouse	ENSF00000002499	ENSMUSP00000096661	ENSMUSP00000021641	ENSMUSG00000047907	ENSMUSG00000021217
mouse	ENSF00000018179	ENSMUSP00000096731	ENSMUSP00000096563	ENSMUSG00000058174	ENSMUSG00000065952
mouse	ENSF00000005302	ENSMUSP00000096866	ENSMUSP00000092916	ENSMUSG00000074732	ENSMUSG00000071083
mouse	ENSF00000008275	ENSMUSP00000097326	ENSMUSP00000091893	ENSMUSG00000075054	ENSMUSG00000070522
mouse	ENSF00000000237	ENSMUSP00000097823	ENSMUSP00000049909	ENSMUSG00000075434	ENSMUSG00000049103
mouse	ENSF00000002308	ENSMUSP00000099887	ENSMUSP00000053781	ENSMUSG00000038172	ENSMUSG00000046196
mouse	ENSF00000002414	ENSMUSP00000100009	ENSMUSP00000060926	ENSMUSG00000069132	ENSMUSG00000046178
chimp	ENSF00000001831	ENSPTRP00000000144	ENSPTRP00000051792	ENSPTRG00000000076	ENSPTRG00000030396
chimp	ENSF00000007780	ENSPTRP00000000302	ENSPTRP00000047754	ENSPTRG00000000157	ENSPTRG00000028450
chimp	ENSF00000000253	ENSPTRP00000000548	ENSPTRP00000049368	ENSPTRG00000024145	ENSPTRG00000000312
chimp	ENSF00000003826	ENSPTRP00000000712	ENSPTRP00000031583	ENSPTRG00000000407	ENSPTRG00000018493
chimp	ENSF00000000064	ENSPTRP00000000847	ENSPTRP00000024203	ENSPTRG00000000483	ENSPTRG00000014054
chimp	ENSF00000000963	ENSPTRP00000001059	ENSPTRP00000010950	ENSPTRG00000000615	ENSPTRG00000006456
chimp	ENSF00000004675	ENSPTRP00000001819	ENSPTRP00000025772	ENSPTRG00000001053	ENSPTRG00000014931
chimp	ENSF00000003131	ENSPTRP00000001864	ENSPTRP00000025846	ENSPTRG00000001074	ENSPTRG00000014972
chimp	ENSF00000001366	ENSPTRP00000001913	ENSPTRP00000008098	ENSPTRG00000001110	ENSPTRG00000004744
chimp	ENSF00000001368	ENSPTRP00000001964	ENSPTRP00000007797	ENSPTRG00000001146	ENSPTRG00000004564
chimp	ENSF00000001873	ENSPTRP00000001967	ENSPTRP00000036263	ENSPTRG00000001149	ENSPTRG00000021225
chimp	ENSF00000002627	ENSPTRP00000002170	ENSPTRP00000029368	ENSPTRG00000001277	ENSPTRG00000017167
chimp	ENSF00000000276	ENSPTRP00000002547	ENSPTRP00000030506	ENSPTRG00000001514	ENSPTRG00000017895
chimp	ENSF00000000336	ENSPTRP00000003000	ENSPTRP00000026952	ENSPTRG00000001797	ENSPTRG00000015666
chimp	ENSF00000011492	ENSPTRP00000003310	ENSPTRP00000048998	ENSPTRG00000001967	ENSPTRG00000029114
chimp	ENSF00000000113	ENSPTRP00000003488	ENSPTRP00000033215	ENSPTRG00000002066	ENSPTRG00000019415
chimp	ENSF00000000018	ENSPTRP00000003532	ENSPTRP00000036270	ENSPTRG00000002086	ENSPTRG00000021231
chimp	ENSF00000000192	ENSPTRP00000003746	ENSPTRP00000017747	ENSPTRG00000002215	ENSPTRG00000010430
chimp	ENSF00000002136	ENSPTRP00000004226	ENSPTRP00000041482	ENSPTRG00000002457	ENSPTRG00000024052
chimp	ENSF00000001639	ENSPTRP00000004388	ENSPTRP00000029568	ENSPTRG00000002545	ENSPTRG00000017292
chimp	ENSF00000001989	ENSPTRP00000004788	ENSPTRP00000054013	ENSPTRG00000002739	ENSPTRG00000031459
chimp	ENSF00000000113	ENSPTRP00000005104	ENSPTRP00000026816	ENSPTRG00000002897	ENSPTRG00000015583
chimp	ENSF00000009794	ENSPTRP00000005126	ENSPTRP00000047362	ENSPTRG00000002910	ENSPTRG00000028249
chimp	ENSF00000006482	ENSPTRP00000005159	ENSPTRP00000020961	ENSPTRG00000002927	ENSPTRG00000012231
chimp	ENSF00000003601	ENSPTRP00000005503	ENSPTRP00000008154	ENSPTRG00000003123	ENSPTRG00000004778
chimp	ENSF00000002440	ENSPTRP00000005837	ENSPTRP00000009164	ENSPTRG00000003339	ENSPTRG00000005401
chimp	ENSF00000006414	ENSPTRP00000005892	ENSPTRP00000008964	ENSPTRG00000003375	ENSPTRG00000005273
chimp	ENSF00000000485	ENSPTRP00000005960	ENSPTRP00000012181	ENSPTRG00000003423	ENSPTRG00000007125
chimp	ENSF00000000836	ENSPTRP00000005975	ENSPTRP00000032021	ENSPTRG00000003432	ENSPTRG00000018763
chimp	ENSF00000000276	ENSPTRP00000006274	ENSPTRP00000005808	ENSPTRG00000003616	ENSPTRG00000003323
chimp	ENSF00000002516	ENSPTRP00000006308	ENSPTRP00000003046	ENSPTRG00000003651	ENSPTRG00000001823
chimp	ENSF00000005094	ENSPTRP00000006597	ENSPTRP00000020155	ENSPTRG00000003834	ENSPTRG00000011728
chimp	ENSF00000002851	ENSPTRP00000006664	ENSPTRP00000017181	ENSPTRG00000003866	ENSPTRG00000010112
chimp	ENSF00000000396	ENSPTRP00000006791	ENSPTRP00000020093	ENSPTRG00000003944	ENSPTRG00000011693
chimp	ENSF00000011095	ENSPTRP00000007179	ENSPTRP00000015784	ENSPTRG00000004174	ENSPTRG00000009280
chimp	ENSF00000006619	ENSPTRP00000007469	ENSPTRP00000037728	ENSPTRG00000004358	ENSPTRG00000021953
chimp	ENSF00000000999	ENSPTRP00000007987	ENSPTRP00000012741	ENSPTRG00000004670	ENSPTRG00000007454
chimp	ENSF00000000111	ENSPTRP00000008506	ENSPTRP00000036205	ENSPTRG00000004995	ENSPTRG00000021185
chimp	ENSF00000002146	ENSPTRP00000008638	ENSPTRP00000042787	ENSPTRG00000005075	ENSPTRG00000024159
chimp	ENSF00000000558	ENSPTRP00000008645	ENSPTRP00000016292	ENSPTRG00000005080	ENSPTRG00000009591
chimp	ENSF00000002414	ENSPTRP00000008711	ENSPTRP00000021391	ENSPTRG00000005123	ENSPTRG00000012505
chimp	ENSF00000002605	ENSPTRP00000009005	ENSPTRP00000013256	ENSPTRG00000005299	ENSPTRG00000007765
chimp	ENSF00000003450	ENSPTRP00000009388	ENSPTRP00000030946	ENSPTRG00000005532	ENSPTRG00000018117
chimp	ENSF00000002051	ENSPTRP00000009582	ENSPTRP00000009581	ENSPTRG00000005634	ENSPTRG00000029501
chimp	ENSF00000000402	ENSPTRP00000009889	ENSPTRP00000029641	ENSPTRG00000005809	ENSPTRG00000017344
chimp	ENSF00000001864	ENSPTRP00000009943	ENSPTRP00000045483	ENSPTRG00000005843	ENSPTRG00000022021
chimp	ENSF00000000965	ENSPTRP00000010142	ENSPTRP00000026597	ENSPTRG00000005969	ENSPTRG00000015437
chimp	ENSF00000000130	ENSPTRP00000010174	ENSPTRP00000026761	ENSPTRG00000005983	ENSPTRG00000015544
chimp	ENSF00000002623	ENSPTRP00000010176	ENSPTRP00000049481	ENSPTRG00000005984	ENSPTRG00000029349
chimp	ENSF00000003029	ENSPTRP00000010180	ENSPTRP00000038271	ENSPTRG00000005987	ENSPTRG00000022231
chimp	ENSF00000001035	ENSPTRP00000010231	ENSPTRP00000053124	ENSPTRG00000006019	ENSPTRG00000030978
chimp	ENSF00000001437	ENSPTRP00000010446	ENSPTRP00000023423	ENSPTRG00000006162	ENSPTRG00000013616
chimp	ENSF00000000329	ENSPTRP00000010537	ENSPTRP00000054562	ENSPTRG00000006206	ENSPTRG00000023227
chimp	ENSF00000008297	ENSPTRP00000010608	ENSPTRP00000041579	ENSPTRG00000006251	ENSPTRG00000023729
chimp	ENSF00000004761	ENSPTRP00000010802	ENSPTRP00000042617	ENSPTRG00000006368	ENSPTRG00000023814
chimp	ENSF00000004555	ENSPTRP00000011451	ENSPTRP00000053256	ENSPTRG00000006717	ENSPTRG00000031054
chimp	ENSF00000000270	ENSPTRP00000011775	ENSPTRP00000055058	ENSPTRG00000005035	ENSPTRG00000031443
chimp	ENSF00000002760	ENSPTRP00000011833	ENSPTRP00000006574	ENSPTRG00000006932	ENSPTRG00000003827
chimp	ENSF00000002865	ENSPTRP00000012087	ENSPTRP00000015834	ENSPTRG00000007070	ENSPTRG00000009313
chimp	ENSF00000002635	ENSPTRP00000012116	ENSPTRP00000021047	ENSPTRG00000007088	ENSPTRG00000012285
chimp	ENSF00000000164	ENSPTRP00000012188	ENSPTRP00000049272	ENSPTRG00000007131	ENSPTRG00000029242
chimp	ENSF00000002288	ENSPTRP00000012611	ENSPTRP00000039366	ENSPTRG00000007379	ENSPTRG00000023171
chimp	ENSF00000002827	ENSPTRP00000012651	ENSPTRP00000034689	ENSPTRG00000007404	ENSPTRG00000020255
chimp	ENSF00000001004	ENSPTRP00000012998	ENSPTRP00000009382	ENSPTRG00000007605	ENSPTRG00000005528
chimp	ENSF00000005822	ENSPTRP00000013091	ENSPTRP00000007661	ENSPTRG00000007663	ENSPTRG00000004478
chimp	ENSF00000001897	ENSPTRP00000013883	ENSPTRP00000027699	ENSPTRG00000008136	ENSPTRG00000016106
chimp	ENSF00000006309	ENSPTRP00000013917	ENSPTRP00000009852	ENSPTRG00000008150	ENSPTRG00000005786
chimp	ENSF00000002490	ENSPTRP00000014705	ENSPTRP00000017574	ENSPTRG00000008615	ENSPTRG00000010331
chimp	ENSF00000003303	ENSPTRP00000014707	ENSPTRP00000043764	ENSPTRG00000008616	ENSPTRG00000023705
chimp	ENSF00000005189	ENSPTRP00000014816	ENSPTRP00000051022	ENSPTRG00000008690	ENSPTRG00000030108
chimp	ENSF00000000297	ENSPTRP00000015595	ENSPTRP00000023834	ENSPTRG00000023269	ENSPTRG00000013844
chimp	ENSF00000000297	ENSPTRP00000015602	ENSPTRP00000046273	ENSPTRG00000009156	ENSPTRG00000023081
chimp	ENSF00000002808	ENSPTRP00000015712	ENSPTRP00000048822	ENSPTRG00000009232	ENSPTRG00000029054
chimp	ENSF00000000018	ENSPTRP00000016618	ENSPTRP00000032258	ENSPTRG00000009762	ENSPTRG00000028754
chimp	ENSF00000000587	ENSPTRP00000016635	ENSPTRP00000043986	ENSPTRG00000009771	ENSPTRG00000023527
chimp	ENSF00000002499	ENSPTRP00000017195	ENSPTRP00000018471	ENSPTRG00000010120	ENSPTRG00000010788
chimp	ENSF00000002642	ENSPTRP00000017340	ENSPTRP00000021591	ENSPTRG00000010200	ENSPTRG00000012633
chimp	ENSF00000002241	ENSPTRP00000017348	ENSPTRP00000051722	ENSPTRG00000010208	ENSPTRG00000030373
chimp	ENSF00000002049	ENSPTRP00000017393	ENSPTRP00000051339	ENSPTRG00000010232	ENSPTRG00000030235
chimp	ENSF00000001185	ENSPTRP00000017530	ENSPTRP00000030341	ENSPTRG00000001474	ENSPTRG00000017769
chimp	ENSF00000002592	ENSPTRP00000017588	ENSPTRP00000043182	ENSPTRG00000010338	ENSPTRG00000024148
chimp	ENSF00000000732	ENSPTRP00000018062	ENSPTRP00000035898	ENSPTRG00000010585	ENSPTRG00000021003
chimp	ENSF00000002434	ENSPTRP00000018237	ENSPTRP00000042855	ENSPTRG00000010686	ENSPTRG00000023480
chimp	ENSF00000001896	ENSPTRP00000018504	ENSPTRP00000044297	ENSPTRG00000010811	ENSPTRG00000024047
chimp	ENSF00000002220	ENSPTRP00000019396	ENSPTRP00000042088	ENSPTRG00000011298	ENSPTRG00000023483
chimp	ENSF00000002585	ENSPTRP00000019397	ENSPTRP00000049738	ENSPTRG00000011299	ENSPTRG00000029452
chimp	ENSF00000002478	ENSPTRP00000019678	ENSPTRP00000042384	ENSPTRG00000011449	ENSPTRG00000023257
chimp	ENSF00000000381	ENSPTRP00000020372	ENSPTRP00000053100	ENSPTRG00000011866	ENSPTRG00000030962
chimp	ENSF00000000543	ENSPTRP00000020398	ENSPTRP00000019152	ENSPTRG00000011881	ENSPTRG00000011156
chimp	ENSF00000006080	ENSPTRP00000020653	ENSPTRP00000026179	ENSPTRG00000012030	ENSPTRG00000015169
chimp	ENSF00000000018	ENSPTRP00000020716	ENSPTRP00000028936	ENSPTRG00000002729	ENSPTRG00000016895
chimp	ENSF00000002805	ENSPTRP00000020797	ENSPTRP00000029084	ENSPTRG00000012120	ENSPTRG00000016980
chimp	ENSF00000001355	ENSPTRP00000021908	ENSPTRP00000023463	ENSPTRG00000012817	ENSPTRG00000013637
chimp	ENSF00000000140	ENSPTRP00000023300	ENSPTRP00000039515	ENSPTRG00000013564	ENSPTRG00000014947
chimp	ENSF00000005604	ENSPTRP00000023432	ENSPTRP00000027369	ENSPTRG00000013621	ENSPTRG00000015889
chimp	ENSF00000000767	ENSPTRP00000023641	ENSPTRP00000019640	ENSPTRG00000013731	ENSPTRG00000011425
chimp	ENSF00000002538	ENSPTRP00000023810	ENSPTRP00000049878	ENSPTRG00000013822	ENSPTRG00000029530
chimp	ENSF00000000202	ENSPTRP00000023935	ENSPTRP00000048229	ENSPTRG00000013906	ENSPTRG00000028707
chimp	ENSF00000002960	ENSPTRP00000024305	ENSPTRP00000009793	ENSPTRG00000014114	ENSPTRG00000005754
chimp	ENSF00000000082	ENSPTRP00000024367	ENSPTRP00000016742	ENSPTRG00000014150	ENSPTRG00000009837
chimp	ENSF00000005892	ENSPTRP00000025309	ENSPTRP00000051953	ENSPTRG00000014671	ENSPTRG00000030484
chimp	ENSF00000001325	ENSPTRP00000025475	ENSPTRP00000012120	ENSPTRG00000022841	ENSPTRG00000028538
chimp	ENSF00000004180	ENSPTRP00000025515	ENSPTRP00000008517	ENSPTRG00000014802	ENSPTRG00000005003
chimp	ENSF00000000001	ENSPTRP00000025552	ENSPTRP00000035328	ENSPTRG00000022973	ENSPTRG00000020663
chimp	ENSF00000002815	ENSPTRP00000026187	ENSPTRP00000003020	ENSPTRG00000015176	ENSPTRG00000029670
chimp	ENSF00000002348	ENSPTRP00000026411	ENSPTRP00000051356	ENSPTRG00000015317	ENSPTRG00000015318
chimp	ENSF00000000881	ENSPTRP00000026434	ENSPTRP00000032204	ENSPTRG00000015335	ENSPTRG00000018861
chimp	ENSF00000000260	ENSPTRP00000028020	ENSPTRP00000034800	ENSPTRG00000016312	ENSPTRG00000020332
chimp	ENSF00000000888	ENSPTRP00000028126	ENSPTRP00000015497	ENSPTRG00000016376	ENSPTRG00000009094
chimp	ENSF00000001989	ENSPTRP00000028359	ENSPTRP00000013135	ENSPTRG00000016518	ENSPTRG00000007693
chimp	ENSF00000004515	ENSPTRP00000028762	ENSPTRP00000034235	ENSPTRG00000016772	ENSPTRG00000019996
chimp	ENSF00000001029	ENSPTRP00000028959	ENSPTRP00000016006	ENSPTRG00000016913	ENSPTRG00000009420
chimp	ENSF00000004994	ENSPTRP00000029173	ENSPTRP00000012573	ENSPTRG00000017041	ENSPTRG00000007355
chimp	ENSF00000001989	ENSPTRP00000029743	ENSPTRP00000022299	ENSPTRG00000017407	ENSPTRG00000013042
chimp	ENSF00000005046	ENSPTRP00000030022	ENSPTRP00000020568	ENSPTRG00000017578	ENSPTRG00000011975
chimp	ENSF00000000095	ENSPTRP00000030136	ENSPTRP00000003729	ENSPTRG00000017640	ENSPTRG00000002199
chimp	ENSF00000001124	ENSPTRP00000030252	ENSPTRP00000029101	ENSPTRG00000017717	ENSPTRG00000016992
chimp	ENSF00000000913	ENSPTRP00000030690	ENSPTRP00000009415	ENSPTRG00000017982	ENSPTRG00000005549
chimp	ENSF00000001187	ENSPTRP00000030774	ENSPTRP00000010440	ENSPTRG00000018022	ENSPTRG00000006157
chimp	ENSF00000002511	ENSPTRP00000030810	ENSPTRP00000039838	ENSPTRG00000018039	ENSPTRG00000023212
chimp	ENSF00000001851	ENSPTRP00000030830	ENSPTRP00000036536	ENSPTRG00000018052	ENSPTRG00000021380
chimp	ENSF00000007450	ENSPTRP00000030831	ENSPTRP00000047542	ENSPTRG00000018053	ENSPTRG00000028348
chimp	ENSF00000001088	ENSPTRP00000031436	ENSPTRP00000053675	ENSPTRG00000018401	ENSPTRG00000031248
chimp	ENSF00000007114	ENSPTRP00000031490	ENSPTRP00000021086	ENSPTRG00000018434	ENSPTRG00000012311
chimp	ENSF00000001207	ENSPTRP00000032465	ENSPTRP00000034501	ENSPTRG00000018996	ENSPTRG00000020153
chimp	ENSF00000001318	ENSPTRP00000032477	ENSPTRP00000048192	ENSPTRG00000019003	ENSPTRG00000028695
chimp	ENSF00000000001	ENSPTRP00000032836	ENSPTRP00000043984	ENSPTRG00000029064	ENSPTRG00000019214
chimp	ENSF00000000415	ENSPTRP00000033295	ENSPTRP00000029881	ENSPTRG00000019457	ENSPTRG00000017490
chimp	ENSF00000001160	ENSPTRP00000033750	ENSPTRP00000054027	ENSPTRG00000019701	ENSPTRG00000031471
chimp	ENSF00000000629	ENSPTRP00000033806	ENSPTRP00000011746	ENSPTRG00000019734	ENSPTRG00000006874
chimp	ENSF00000000593	ENSPTRP00000034089	ENSPTRP00000028964	ENSPTRG00000019904	ENSPTRG00000016918
chimp	ENSF00000001484	ENSPTRP00000034121	ENSPTRP00000024838	ENSPTRG00000019922	ENSPTRG00000014416
chimp	ENSF00000000750	ENSPTRP00000034477	ENSPTRP00000029492	ENSPTRG00000020141	ENSPTRG00000017238
chimp	ENSF00000003061	ENSPTRP00000034480	ENSPTRP00000047991	ENSPTRG00000020143	ENSPTRG00000028596
chimp	ENSF00000002318	ENSPTRP00000034802	ENSPTRP00000053333	ENSPTRG00000020334	ENSPTRG00000031106
chimp	ENSF00000009384	ENSPTRP00000035005	ENSPTRP00000009972	ENSPTRG00000020470	ENSPTRG00000005862
chimp	ENSF00000005830	ENSPTRP00000035719	ENSPTRP00000012475	ENSPTRG00000020883	ENSPTRG00000007290
chimp	ENSF00000001511	ENSPTRP00000036058	ENSPTRP00000049130	ENSPTRG00000021097	ENSPTRG00000029182
chimp	ENSF00000001821	ENSPTRP00000037227	ENSPTRP00000027992	ENSPTRG00000021717	ENSPTRG00000016297
chimp	ENSF00000002127	ENSPTRP00000037284	ENSPTRP00000054742	ENSPTRG00000021745	ENSPTRG00000004677
chimp	ENSF00000007967	ENSPTRP00000037925	ENSPTRP00000027575	ENSPTRG00000022049	ENSPTRG00000016027
chimp	ENSF00000000663	ENSPTRP00000038121	ENSPTRP00000032388	ENSPTRG00000022163	ENSPTRG00000018958
chimp	ENSF00000000380	ENSPTRP00000038228	ENSPTRP00000040495	ENSPTRG00000022210	ENSPTRG00000022846
chimp	ENSF00000000134	ENSPTRP00000038570	ENSPTRP00000049475	ENSPTRG00000022389	ENSPTRG00000029345
chimp	ENSF00000002009	ENSPTRP00000038655	ENSPTRP00000028429	ENSPTRG00000022429	ENSPTRG00000016563
chimp	ENSF00000006929	ENSPTRP00000038681	ENSPTRP00000051843	ENSPTRG00000022440	ENSPTRG00000030434
chimp	ENSF00000003078	ENSPTRP00000039476	ENSPTRP00000045705	ENSPTRG00000029029	ENSPTRG00000023376
chimp	ENSF00000000001	ENSPTRP00000040717	ENSPTRP00000048470	ENSPTRG00000008625	ENSPTRG00000028870
chimp	ENSF00000000790	ENSPTRP00000040828	ENSPTRP00000040356	ENSPTRG00000007619	ENSPTRG00000024161
chimp	ENSF00000000229	ENSPTRP00000041157	ENSPTRP00000047475	ENSPTRG00000018344	ENSPTRG00000028313
chimp	ENSF00000000482	ENSPTRP00000041272	ENSPTRP00000001764	ENSPTRG00000010485	ENSPTRG00000001022
chimp	ENSF00000001345	ENSPTRP00000041796	ENSPTRP00000037734	ENSPTRG00000021055	ENSPTRG00000021958
chimp	ENSF00000000582	ENSPTRP00000041942	ENSPTRP00000023719	ENSPTRG00000014357	ENSPTRG00000030459
chimp	ENSF00000000354	ENSPTRP00000042587	ENSPTRP00000029722	ENSPTRG00000024086	ENSPTRG00000017391
chimp	ENSF00000000183	ENSPTRP00000042839	ENSPTRP00000053856	ENSPTRG00000023064	ENSPTRG00000031337
chimp	ENSF00000000263	ENSPTRP00000042880	ENSPTRP00000044148	ENSPTRG00000023653	ENSPTRG00000030152
chimp	ENSF00000006296	ENSPTRP00000042964	ENSPTRP00000031999	ENSPTRG00000024222	ENSPTRG00000018749
chimp	ENSF00000002425	ENSPTRP00000043911	ENSPTRP00000047414	ENSPTRG00000009258	ENSPTRG00000028284
chimp	ENSF00000001747	ENSPTRP00000043914	ENSPTRP00000031454	ENSPTRG00000024370	ENSPTRG00000018411
chimp	ENSF00000001206	ENSPTRP00000044138	ENSPTRP00000031205	ENSPTRG00000022052	ENSPTRG00000018264
chimp	ENSF00000001620	ENSPTRP00000044230	ENSPTRP00000029330	ENSPTRG00000021693	ENSPTRG00000017138
chimp	ENSF00000000916	ENSPTRP00000045105	ENSPTRP00000020647	ENSPTRG00000005018	ENSPTRG00000012025
chimp	ENSF00000000079	ENSPTRP00000045440	ENSPTRP00000051681	ENSPTRG00000022880	ENSPTRG00000030363
chimp	ENSF00000000418	ENSPTRP00000046044	ENSPTRP00000041427	ENSPTRG00000020475	ENSPTRG00000022593
chimp	ENSF00000000164	ENSPTRP00000046660	ENSPTRP00000026619	ENSPTRG00000029193	ENSPTRG00000015453
chimp	ENSF00000001624	ENSPTRP00000047205	ENSPTRP00000048997	ENSPTRG00000022432	ENSPTRG00000029113
chimp	ENSF00000005421	ENSPTRP00000047225	ENSPTRP00000021244	ENSPTRG00000028174	ENSPTRG00000012409
chimp	ENSF00000009092	ENSPTRP00000047277	ENSPTRP00000020386	ENSPTRG00000022242	ENSPTRG00000011875
chimp	ENSF00000001610	ENSPTRP00000047298	ENSPTRP00000052508	ENSPTRG00000028215	ENSPTRG00000030674
chimp	ENSF00000003780	ENSPTRP00000047390	ENSPTRP00000035579	ENSPTRG00000021955	ENSPTRG00000020798
chimp	ENSF00000001026	ENSPTRP00000047466	ENSPTRP00000040362	ENSPTRG00000021770	ENSPTRG00000016573
chimp	ENSF00000021874	ENSPTRP00000047665	ENSPTRP00000053480	ENSPTRG00000028406	ENSPTRG00000031173
chimp	ENSF00000000317	ENSPTRP00000047919	ENSPTRP00000009862	ENSPTRG00000017401	ENSPTRG00000005793
chimp	ENSF00000006435	ENSPTRP00000048089	ENSPTRP00000049042	ENSPTRG00000028634	ENSPTRG00000029145
chimp	ENSF00000001073	ENSPTRP00000048182	ENSPTRP00000036387	ENSPTRG00000028689	ENSPTRG00000030912
chimp	ENSF00000009382	ENSPTRP00000048332	ENSPTRP00000051053	ENSPTRG00000026567	ENSPTRG00000017060
chimp	ENSF00000001170	ENSPTRP00000048393	ENSPTRP00000005794	ENSPTRG00000028806	ENSPTRG00000003312
chimp	ENSF00000001629	ENSPTRP00000048931	ENSPTRP00000047512	ENSPTRG00000029092	ENSPTRG00000028329
chimp	ENSF00000000532	ENSPTRP00000049045	ENSPTRP00000008535	ENSPTRG00000029149	ENSPTRG00000005013
chimp	ENSF00000001869	ENSPTRP00000049646	ENSPTRP00000015989	ENSPTRG00000029419	ENSPTRG00000009413
chimp	ENSF00000006935	ENSPTRP00000049917	ENSPTRP00000042502	ENSPTRG00000005431	ENSPTRG00000028702
chimp	ENSF00000003694	ENSPTRP00000050796	ENSPTRP00000014575	ENSPTRG00000003657	ENSPTRG00000008541
chimp	ENSF00000000139	ENSPTRP00000051456	ENSPTRP00000035683	ENSPTRG00000007132	ENSPTRG00000020865
chimp	ENSF00000000202	ENSPTRP00000051685	ENSPTRP00000007641	ENSPTRG00000030365	ENSPTRG00000004469
chimp	ENSF00000004388	ENSPTRP00000051989	ENSPTRP00000001367	ENSPTRG00000011902	ENSPTRG00000000795
chimp	ENSF00000001033	ENSPTRP00000052040	ENSPTRP00000022007	ENSPTRG00000013614	ENSPTRG00000012872
chimp	ENSF00000001311	ENSPTRP00000052044	ENSPTRP00000025518	ENSPTRG00000013608	ENSPTRG00000014804
chimp	ENSF00000000134	ENSPTRP00000052087	ENSPTRP00000003820	ENSPTRG00000030540	ENSPTRG00000002255
chimp	ENSF00000001413	ENSPTRP00000052461	ENSPTRP00000055011	ENSPTRG00000013171	ENSPTRG00000013170
chimp	ENSF00000002690	ENSPTRP00000052559	ENSPTRP00000019178	ENSPTRG00000030695	ENSPTRG00000011171
chimp	ENSF00000003755	ENSPTRP00000052568	ENSPTRP00000052208	ENSPTRG00000030701	ENSPTRG00000030570
chimp	ENSF00000001541	ENSPTRP00000052592	ENSPTRP00000018802	ENSPTRG00000030712	ENSPTRG00000010968
chimp	ENSF00000003674	ENSPTRP00000053007	ENSPTRP00000014169	ENSPTRG00000020677	ENSPTRG00000008296
chimp	ENSF00000000146	ENSPTRP00000053166	ENSPTRP00000044279	ENSPTRG00000031000	ENSPTRG00000023901
chimp	ENSF00000005263	ENSPTRP00000053250	ENSPTRP00000000449	ENSPTRG00000031045	ENSPTRG00000000251
chimp	ENSF00000000153	ENSPTRP00000053271	ENSPTRP00000051217	ENSPTRG00000031067	ENSPTRG00000030188
chimp	ENSF00000007207	ENSPTRP00000053380	ENSPTRP00000052927	ENSPTRG00000008419	ENSPTRG00000030855
chimp	ENSF00000010699	ENSPTRP00000053969	ENSPTRP00000042605	ENSPTRG00000031432	ENSPTRG00000024386
chimp	ENSF00000000302	ENSPTRP00000054570	ENSPTRP00000054510	ENSPTRG00000017953	ENSPTRG00000001427
dog	ENSF00000001320	ENSCAFP00000000471	ENSCAFP00000010469	ENSCAFG00000000336	ENSCAFG00000007044
dog	ENSF00000001186	ENSCAFP00000001059	ENSCAFP00000024170	ENSCAFG00000000754	ENSCAFG00000016420
dog	ENSF00000001187	ENSCAFP00000001185	ENSCAFP00000016648	ENSCAFG00000000829	ENSCAFG00000011311
dog	ENSF00000002847	ENSCAFP00000001323	ENSCAFP00000025534	ENSCAFG00000000929	ENSCAFG00000017329
dog	ENSF00000001639	ENSCAFP00000001908	ENSCAFP00000019546	ENSCAFG00000001329	ENSCAFG00000013270
dog	ENSF00000000253	ENSCAFP00000002174	ENSCAFP00000008817	ENSCAFG00000001508	ENSCAFG00000005889
dog	ENSF00000003464	ENSCAFP00000002498	ENSCAFP00000010101	ENSCAFG00000001718	ENSCAFG00000006768
dog	ENSF00000001752	ENSCAFP00000003226	ENSCAFP00000006488	ENSCAFG00000002215	ENSCAFG00000004364
dog	ENSF00000000058	ENSCAFP00000003677	ENSCAFP00000006006	ENSCAFG00000002524	ENSCAFG00000004047
dog	ENSF00000000183	ENSCAFP00000004658	ENSCAFP00000022029	ENSCAFG00000003124	ENSCAFG00000014968
dog	ENSF00000002115	ENSCAFP00000004886	ENSCAFP00000008934	ENSCAFG00000003297	ENSCAFG00000005960
dog	ENSF00000004894	ENSCAFP00000004940	ENSCAFP00000032911	ENSCAFG00000003337	ENSCAFG00000016075
dog	ENSF00000000629	ENSCAFP00000004995	ENSCAFP00000032974	ENSCAFG00000003363	ENSCAFG00000008002
dog	ENSF00000000627	ENSCAFP00000005716	ENSCAFP00000022540	ENSCAFG00000003836	ENSCAFG00000015289
dog	ENSF00000003826	ENSCAFP00000005732	ENSCAFP00000010166	ENSCAFG00000003846	ENSCAFG00000006823
dog	ENSF00000000202	ENSCAFP00000005930	ENSCAFP00000033242	ENSCAFG00000004001	ENSCAFG00000008730
dog	ENSF00000000504	ENSCAFP00000006178	ENSCAFP00000032975	ENSCAFG00000004158	ENSCAFG00000001467
dog	ENSF00000005194	ENSCAFP00000006777	ENSCAFP00000024439	ENSCAFG00000004543	ENSCAFG00000016617
dog	ENSF00000000034	ENSCAFP00000007014	ENSCAFP00000023616	ENSCAFG00000004702	ENSCAFG00000016031
dog	ENSF00000001410	ENSCAFP00000007021	ENSCAFP00000021533	ENSCAFG00000004708	ENSCAFG00000014605
dog	ENSF00000001355	ENSCAFP00000007040	ENSCAFP00000024097	ENSCAFG00000004724	ENSCAFG00000016367
dog	ENSF00000001484	ENSCAFP00000007728	ENSCAFP00000023351	ENSCAFG00000005174	ENSCAFG00000015882
dog	ENSF00000000336	ENSCAFP00000007753	ENSCAFP00000016231	ENSCAFG00000005189	ENSCAFG00000011021
dog	ENSF00000002495	ENSCAFP00000007862	ENSCAFP00000009370	ENSCAFG00000005260	ENSCAFG00000006250
dog	ENSF00000007421	ENSCAFP00000008345	ENSCAFP00000016866	ENSCAFG00000005582	ENSCAFG00000011481
dog	ENSF00000004697	ENSCAFP00000008470	ENSCAFP00000033578	ENSCAFG00000005671	ENSCAFG00000024587
dog	ENSF00000002974	ENSCAFP00000009836	ENSCAFP00000025387	ENSCAFG00000006578	ENSCAFG00000017234
dog	ENSF00000002428	ENSCAFP00000009963	ENSCAFP00000033660	ENSCAFG00000006670	ENSCAFG00000012123
dog	ENSF00000000001	ENSCAFP00000009997	ENSCAFP00000003564	ENSCAFG00000006707	ENSCAFG00000002441
dog	ENSF00000000916	ENSCAFP00000010191	ENSCAFP00000020397	ENSCAFG00000006821	ENSCAFG00000013845
dog	ENSF00000001311	ENSCAFP00000010535	ENSCAFP00000008003	ENSCAFG00000007098	ENSCAFG00000005370
dog	ENSF00000001896	ENSCAFP00000010916	ENSCAFP00000007178	ENSCAFG00000007358	ENSCAFG00000004808
dog	ENSF00000000188	ENSCAFP00000011114	ENSCAFP00000000819	ENSCAFG00000007485	ENSCAFG00000000583
dog	ENSF00000003372	ENSCAFP00000011148	ENSCAFP00000001354	ENSCAFG00000007507	ENSCAFG00000000946
dog	ENSF00000000244	ENSCAFP00000012112	ENSCAFP00000021948	ENSCAFG00000008244	ENSCAFG00000014893
dog	ENSF00000002267	ENSCAFP00000012560	ENSCAFP00000025715	ENSCAFG00000008553	ENSCAFG00000017450
dog	ENSF00000001129	ENSCAFP00000012917	ENSCAFP00000017667	ENSCAFG00000008791	ENSCAFG00000012005
dog	ENSF00000003219	ENSCAFP00000013284	ENSCAFP00000024633	ENSCAFG00000009039	ENSCAFG00000016754
dog	ENSF00000002295	ENSCAFP00000013385	ENSCAFP00000001373	ENSCAFG00000009101	ENSCAFG00000000967
dog	ENSF00000000202	ENSCAFP00000013508	ENSCAFP00000017466	ENSCAFG00000009183	ENSCAFG00000011871
dog	ENSF00000001555	ENSCAFP00000014524	ENSCAFP00000025481	ENSCAFG00000009883	ENSCAFG00000017299
dog	ENSF00000000628	ENSCAFP00000014984	ENSCAFP00000005718	ENSCAFG00000010207	ENSCAFG00000003838
dog	ENSF00000006771	ENSCAFP00000015860	ENSCAFP00000007234	ENSCAFG00000024640	ENSCAFG00000004848
dog	ENSF00000004675	ENSCAFP00000016570	ENSCAFP00000013574	ENSCAFG00000011248	ENSCAFG00000009232
dog	ENSF00000000202	ENSCAFP00000017004	ENSCAFP00000032858	ENSCAFG00000011577	ENSCAFG00000010741
dog	ENSF00000000034	ENSCAFP00000017166	ENSCAFP00000002766	ENSCAFG00000011666	ENSCAFG00000001886
dog	ENSF00000000217	ENSCAFP00000017491	ENSCAFP00000000126	ENSCAFG00000011887	ENSCAFG00000000090
dog	ENSF00000000302	ENSCAFP00000017633	ENSCAFP00000025584	ENSCAFG00000011978	ENSCAFG00000017368
dog	ENSF00000001355	ENSCAFP00000018307	ENSCAFP00000020001	ENSCAFG00000012431	ENSCAFG00000013586
dog	ENSF00000001549	ENSCAFP00000018310	ENSCAFP00000025254	ENSCAFG00000012439	ENSCAFG00000017146
dog	ENSF00000000364	ENSCAFP00000019400	ENSCAFP00000019956	ENSCAFG00000013159	ENSCAFG00000013547
dog	ENSF00000000898	ENSCAFP00000019450	ENSCAFP00000024253	ENSCAFG00000013194	ENSCAFG00000016486
dog	ENSF00000001242	ENSCAFP00000019682	ENSCAFP00000003086	ENSCAFG00000013351	ENSCAFG00000002100
dog	ENSF00000000413	ENSCAFP00000019958	ENSCAFP00000018103	ENSCAFG00000013549	ENSCAFG00000012290
dog	ENSF00000000237	ENSCAFP00000020316	ENSCAFP00000006935	ENSCAFG00000013782	ENSCAFG00000004658
dog	ENSF00000000113	ENSCAFP00000020655	ENSCAFP00000032857	ENSCAFG00000014015	ENSCAFG00000024150
dog	ENSF00000004180	ENSCAFP00000020773	ENSCAFP00000005903	ENSCAFG00000014086	ENSCAFG00000003974
dog	ENSF00000000253	ENSCAFP00000021684	ENSCAFP00000025159	ENSCAFG00000014707	ENSCAFG00000017087
dog	ENSF00000001477	ENSCAFP00000021749	ENSCAFP00000029749	ENSCAFG00000014753	ENSCAFG00000020075
dog	ENSF00000002463	ENSCAFP00000021815	ENSCAFP00000022053	ENSCAFG00000014799	ENSCAFG00000014984
dog	ENSF00000000306	ENSCAFP00000021896	ENSCAFP00000009754	ENSCAFG00000014858	ENSCAFG00000006516
dog	ENSF00000002868	ENSCAFP00000021976	ENSCAFP00000012952	ENSCAFG00000014913	ENSCAFG00000008808
dog	ENSF00000000096	ENSCAFP00000022485	ENSCAFP00000005774	ENSCAFG00000015245	ENSCAFG00000003876
dog	ENSF00000000844	ENSCAFP00000022634	ENSCAFP00000022871	ENSCAFG00000015373	ENSCAFG00000015557
dog	ENSF00000001960	ENSCAFP00000022943	ENSCAFP00000022283	ENSCAFG00000015605	ENSCAFG00000015119
dog	ENSF00000000018	ENSCAFP00000023085	ENSCAFP00000027393	ENSCAFG00000015708	ENSCAFG00000018565
dog	ENSF00000002708	ENSCAFP00000023805	ENSCAFP00000003823	ENSCAFG00000016151	ENSCAFG00000002630
dog	ENSF00000002662	ENSCAFP00000024398	ENSCAFP00000033519	ENSCAFG00000016592	ENSCAFG00000024541
dog	ENSF00000000117	ENSCAFP00000024505	ENSCAFP00000006324	ENSCAFG00000016657	ENSCAFG00000024099
dog	ENSF00000002797	ENSCAFP00000026668	ENSCAFP00000007695	ENSCAFG00000018045	ENSCAFG00000005152
dog	ENSF00000001969	ENSCAFP00000028141	ENSCAFP00000026478	ENSCAFG00000019075	ENSCAFG00000017936
dog	ENSF00000003694	ENSCAFP00000028398	ENSCAFP00000020863	ENSCAFG00000019250	ENSCAFG00000014157
dog	ENSF00000003215	ENSCAFP00000028403	ENSCAFP00000032752	ENSCAFG00000019254	ENSCAFG00000024074
dog	ENSF00000000556	ENSCAFP00000028441	ENSCAFP00000029624	ENSCAFG00000019278	ENSCAFG00000019993
dog	ENSF00000002049	ENSCAFP00000028693	ENSCAFP00000026684	ENSCAFG00000019410	ENSCAFG00000018057
dog	ENSF00000000455	ENSCAFP00000028867	ENSCAFP00000005103	ENSCAFG00000019526	ENSCAFG00000003421
dog	ENSF00000000164	ENSCAFP00000029496	ENSCAFP00000010532	ENSCAFG00000019915	ENSCAFG00000007096
dog	ENSF00000005303	ENSCAFP00000030178	ENSCAFP00000014444	ENSCAFG00000020348	ENSCAFG00000009832
dog	ENSF00000000638	ENSCAFP00000030613	ENSCAFP00000033236	ENSCAFG00000019286	ENSCAFG00000024398
dog	ENSF00000001176	ENSCAFP00000030985	ENSCAFP00000009573	ENSCAFG00000000852	ENSCAFG00000006392
dog	ENSF00000008880	ENSCAFP00000031176	ENSCAFP00000033046	ENSCAFG00000023355	ENSCAFG00000024291
dog	ENSF00000000146	ENSCAFP00000031991	ENSCAFP00000006717	ENSCAFG00000000556	ENSCAFG00000004498
dog	ENSF00000000064	ENSCAFP00000032195	ENSCAFP00000021827	ENSCAFG00000023784	ENSCAFG00000014813
dog	ENSF00000000316	ENSCAFP00000033676	ENSCAFP00000011449	ENSCAFG00000006846	ENSCAFG00000007715
dog	ENSF00000000300	ENSCAFP00000033736	ENSCAFP00000016675	ENSCAFG00000024677	ENSCAFG00000024180
dog	ENSF00000000022	ENSCAFP00000034055	ENSCAFP00000004911	ENSCAFG00000024806	ENSCAFG00000003316
dog	ENSF00000005710	ENSCAFP00000034095	ENSCAFP00000007232	ENSCAFG00000014056	ENSCAFG00000004845
dog	ENSF00000001490	ENSCAFP00000034229	ENSCAFP00000019126	ENSCAFG00000024898	ENSCAFG00000012989
dog	ENSF00000001785	ENSCAFP00000034331	ENSCAFP00000016692	ENSCAFG00000024955	ENSCAFG00000011342
dog	ENSF00000001989	ENSCAFP00000034460	ENSCAFP00000014470	ENSCAFG00000004081	ENSCAFG00000009844
dog	ENSF00000000441	ENSCAFP00000034522	ENSCAFP00000033636	ENSCAFG00000025036	ENSCAFG00000024628
dog	ENSF00000002465	ENSCAFP00000034628	ENSCAFP00000026801	ENSCAFG00000014525	ENSCAFG00000018142
dog	ENSF00000006844	ENSCAFP00000035308	ENSCAFP00000000631	ENSCAFG00000025401	ENSCAFG00000000434
dog	ENSF00000000066	ENSCAFP00000035338	ENSCAFP00000032665	ENSCAFG00000025430	ENSCAFG00000024011
dog	ENSF00000000190	ENSCAFP00000035448	ENSCAFP00000033155	ENSCAFG00000025459	ENSCAFG00000024352
cow	ENSF00000000130	ENSBTAP00000000114	ENSBTAP00000017619	ENSBTAG00000000105	ENSBTAG00000012954
cow	ENSF00000000253	ENSBTAP00000000453	ENSBTAP00000005370	ENSBTAG00000000347	ENSBTAG00000004110
cow	ENSF00000000455	ENSBTAP00000000529	ENSBTAP00000010501	ENSBTAG00000000414	ENSBTAG00000007989
cow	ENSF00000002659	ENSBTAP00000000683	ENSBTAP00000011960	ENSBTAG00000000524	ENSBTAG00000009073
cow	ENSF00000004809	ENSBTAP00000000755	ENSBTAP00000042654	ENSBTAG00000000578	ENSBTAG00000031906
cow	ENSF00000003594	ENSBTAP00000001466	ENSBTAP00000021543	ENSBTAG00000001108	ENSBTAG00000016186
cow	ENSF00000000248	ENSBTAP00000001512	ENSBTAP00000014794	ENSBTAG00000001139	ENSBTAG00000011139
cow	ENSF00000000001	ENSBTAP00000001821	ENSBTAP00000047002	ENSBTAG00000001385	ENSBTAG00000021789
cow	ENSF00000001345	ENSBTAP00000002028	ENSBTAP00000023472	ENSBTAG00000001548	ENSBTAG00000017647
cow	ENSF00000001969	ENSBTAP00000002107	ENSBTAP00000023482	ENSBTAG00000001605	ENSBTAG00000017657
cow	ENSF00000002592	ENSBTAP00000002349	ENSBTAP00000003321	ENSBTAG00000001794	ENSBTAG00000002565
cow	ENSF00000000244	ENSBTAP00000002398	ENSBTAP00000040446	ENSBTAG00000001835	ENSBTAG00000030338
cow	ENSF00000000001	ENSBTAP00000002428	ENSBTAP00000028126	ENSBTAG00000010255	ENSBTAG00000021112
cow	ENSF00000000568	ENSBTAP00000002674	ENSBTAP00000044505	ENSBTAG00000002068	ENSBTAG00000010148
cow	ENSF00000000529	ENSBTAP00000003031	ENSBTAP00000014922	ENSBTAG00000002349	ENSBTAG00000011236
cow	ENSF00000000300	ENSBTAP00000003177	ENSBTAP00000046113	ENSBTAG00000002446	ENSBTAG00000034724
cow	ENSF00000000291	ENSBTAP00000003294	ENSBTAP00000006387	ENSBTAG00000002536	ENSBTAG00000004859
cow	ENSF00000003084	ENSBTAP00000003340	ENSBTAP00000006113	ENSBTAG00000002579	ENSBTAG00000004657
cow	ENSF00000002499	ENSBTAP00000003479	ENSBTAP00000000543	ENSBTAG00000002687	ENSBTAG00000000422
cow	ENSF00000000919	ENSBTAP00000003779	ENSBTAP00000024374	ENSBTAG00000002910	ENSBTAG00000018319
cow	ENSF00000000001	ENSBTAP00000003993	ENSBTAP00000047418	ENSBTAG00000031874	ENSBTAG00000036257
cow	ENSF00000000146	ENSBTAP00000004157	ENSBTAP00000008645	ENSBTAG00000003202	ENSBTAG00000006582
cow	ENSF00000000949	ENSBTAP00000004248	ENSBTAP00000025482	ENSBTAG00000003281	ENSBTAG00000019144
cow	ENSF00000000381	ENSBTAP00000004406	ENSBTAP00000010214	ENSBTAG00000003398	ENSBTAG00000007768
cow	ENSF00000000443	ENSBTAP00000004684	ENSBTAP00000018598	ENSBTAG00000031320	ENSBTAG00000013995
cow	ENSF00000000244	ENSBTAP00000004748	ENSBTAP00000024979	ENSBTAG00000003640	ENSBTAG00000018759
cow	ENSF00000000556	ENSBTAP00000004931	ENSBTAP00000015111	ENSBTAG00000003791	ENSBTAG00000011374
cow	ENSF00000005349	ENSBTAP00000005039	ENSBTAP00000038865	ENSBTAG00000003863	ENSBTAG00000011838
cow	ENSF00000002308	ENSBTAP00000005150	ENSBTAP00000017264	ENSBTAG00000003943	ENSBTAG00000012984
cow	ENSF00000001060	ENSBTAP00000005160	ENSBTAP00000010237	ENSBTAG00000003952	ENSBTAG00000007786
cow	ENSF00000001366	ENSBTAP00000005324	ENSBTAP00000017578	ENSBTAG00000004072	ENSBTAG00000013207
cow	ENSF00000000336	ENSBTAP00000005494	ENSBTAP00000009821	ENSBTAG00000004197	ENSBTAG00000007468
cow	ENSF00000002075	ENSBTAP00000005555	ENSBTAP00000027564	ENSBTAG00000004242	ENSBTAG00000020684
cow	ENSF00000003589	ENSBTAP00000005872	ENSBTAP00000019156	ENSBTAG00000004475	ENSBTAG00000014404
cow	ENSF00000000001	ENSBTAP00000006133	ENSBTAP00000013113	ENSBTAG00000004675	ENSBTAG00000009940
cow	ENSF00000001556	ENSBTAP00000006221	ENSBTAP00000019955	ENSBTAG00000004739	ENSBTAG00000014990
cow	ENSF00000000001	ENSBTAP00000006397	ENSBTAP00000013547	ENSBTAG00000031686	ENSBTAG00000012874
cow	ENSF00000002490	ENSBTAP00000006464	ENSBTAP00000017244	ENSBTAG00000004913	ENSBTAG00000012971
cow	ENSF00000005747	ENSBTAP00000006512	ENSBTAP00000044908	ENSBTAG00000004948	ENSBTAG00000026172
cow	ENSF00000000018	ENSBTAP00000006534	ENSBTAP00000014947	ENSBTAG00000004963	ENSBTAG00000011255
cow	ENSF00000000898	ENSBTAP00000007016	ENSBTAP00000034875	ENSBTAG00000031564	ENSBTAG00000025062
cow	ENSF00000009042	ENSBTAP00000007280	ENSBTAP00000038361	ENSBTAG00000005536	ENSBTAG00000010711
cow	ENSF00000002380	ENSBTAP00000007420	ENSBTAP00000008858	ENSBTAG00000005647	ENSBTAG00000006738
cow	ENSF00000000238	ENSBTAP00000007471	ENSBTAP00000038567	ENSBTAG00000032084	ENSBTAG00000027051
cow	ENSF00000004388	ENSBTAP00000008487	ENSBTAP00000005750	ENSBTAG00000006474	ENSBTAG00000004381
cow	ENSF00000002444	ENSBTAP00000008574	ENSBTAP00000028392	ENSBTAG00000006535	ENSBTAG00000021308
cow	ENSF00000002892	ENSBTAP00000008882	ENSBTAP00000020529	ENSBTAG00000006753	ENSBTAG00000015447
cow	ENSF00000000113	ENSBTAP00000008925	ENSBTAP00000023031	ENSBTAG00000006785	ENSBTAG00000017322
cow	ENSF00000001149	ENSBTAP00000009152	ENSBTAP00000024473	ENSBTAG00000006963	ENSBTAG00000027878
cow	ENSF00000000415	ENSBTAP00000009433	ENSBTAP00000040385	ENSBTAG00000007167	ENSBTAG00000030282
cow	ENSF00000001754	ENSBTAP00000009487	ENSBTAP00000022530	ENSBTAG00000007214	ENSBTAG00000016940
cow	ENSF00000002318	ENSBTAP00000009951	ENSBTAP00000011943	ENSBTAG00000007562	ENSBTAG00000009063
cow	ENSF00000001040	ENSBTAP00000010109	ENSBTAP00000003296	ENSBTAG00000007686	ENSBTAG00000002545
cow	ENSF00000000113	ENSBTAP00000010159	ENSBTAP00000034221	ENSBTAG00000007725	ENSBTAG00000024650
cow	ENSF00000000922	ENSBTAP00000010350	ENSBTAP00000009799	ENSBTAG00000007866	ENSBTAG00000007449
cow	ENSF00000000095	ENSBTAP00000010658	ENSBTAP00000009728	ENSBTAG00000013673	ENSBTAG00000007400
cow	ENSF00000000202	ENSBTAP00000010914	ENSBTAP00000001288	ENSBTAG00000008294	ENSBTAG00000000973
cow	ENSF00000001510	ENSBTAP00000010932	ENSBTAP00000030658	ENSBTAG00000008306	ENSBTAG00000022642
cow	ENSF00000001931	ENSBTAP00000011028	ENSBTAP00000004519	ENSBTAG00000008378	ENSBTAG00000003476
cow	ENSF00000009196	ENSBTAP00000011345	ENSBTAP00000015636	ENSBTAG00000008603	ENSBTAG00000011778
cow	ENSF00000013754	ENSBTAP00000011370	ENSBTAP00000020343	ENSBTAG00000008620	ENSBTAG00000015299
cow	ENSF00000000097	ENSBTAP00000011521	ENSBTAP00000027172	ENSBTAG00000008743	ENSBTAG00000020385
cow	ENSF00000004878	ENSBTAP00000012631	ENSBTAP00000014310	ENSBTAG00000009598	ENSBTAG00000010803
cow	ENSF00000004697	ENSBTAP00000012778	ENSBTAP00000023769	ENSBTAG00000009688	ENSBTAG00000017882
cow	ENSF00000002144	ENSBTAP00000012808	ENSBTAP00000028149	ENSBTAG00000009709	ENSBTAG00000021126
cow	ENSF00000005314	ENSBTAP00000013151	ENSBTAP00000043081	ENSBTAG00000009969	ENSBTAG00000020950
cow	ENSF00000001678	ENSBTAP00000013600	ENSBTAP00000044816	ENSBTAG00000010297	ENSBTAG00000033494
cow	ENSF00000005593	ENSBTAP00000013651	ENSBTAP00000026000	ENSBTAG00000010341	ENSBTAG00000019519
cow	ENSF00000002627	ENSBTAP00000013837	ENSBTAP00000019342	ENSBTAG00000010472	ENSBTAG00000014551
cow	ENSF00000000881	ENSBTAP00000014069	ENSBTAP00000027841	ENSBTAG00000010644	ENSBTAG00000020898
cow	ENSF00000004477	ENSBTAP00000014458	ENSBTAP00000042601	ENSBTAG00000010884	ENSBTAG00000031871
cow	ENSF00000001477	ENSBTAP00000014629	ENSBTAP00000004844	ENSBTAG00000011014	ENSBTAG00000003721
cow	ENSF00000000239	ENSBTAP00000014853	ENSBTAP00000041498	ENSBTAG00000011184	ENSBTAG00000005779
cow	ENSF00000000034	ENSBTAP00000015172	ENSBTAP00000035635	ENSBTAG00000011419	ENSBTAG00000025442
cow	ENSF00000002472	ENSBTAP00000015263	ENSBTAP00000009856	ENSBTAG00000011484	ENSBTAG00000007493
cow	ENSF00000005710	ENSBTAP00000015490	ENSBTAP00000015231	ENSBTAG00000011666	ENSBTAG00000011463
cow	ENSF00000008902	ENSBTAP00000015810	ENSBTAP00000021038	ENSBTAG00000011918	ENSBTAG00000015838
cow	ENSF00000000880	ENSBTAP00000015829	ENSBTAP00000018111	ENSBTAG00000011931	ENSBTAG00000013625
cow	ENSF00000002605	ENSBTAP00000015929	ENSBTAP00000005753	ENSBTAG00000012007	ENSBTAG00000004386
cow	ENSF00000003050	ENSBTAP00000016130	ENSBTAP00000001124	ENSBTAG00000012159	ENSBTAG00000032003
cow	ENSF00000001527	ENSBTAP00000016186	ENSBTAP00000040053	ENSBTAG00000012206	ENSBTAG00000027924
cow	ENSF00000000418	ENSBTAP00000016577	ENSBTAP00000026566	ENSBTAG00000012495	ENSBTAG00000019942
cow	ENSF00000000672	ENSBTAP00000016618	ENSBTAP00000015745	ENSBTAG00000012518	ENSBTAG00000011862
cow	ENSF00000003131	ENSBTAP00000016668	ENSBTAP00000008515	ENSBTAG00000012555	ENSBTAG00000006500
cow	ENSF00000003694	ENSBTAP00000016755	ENSBTAP00000016317	ENSBTAG00000012621	ENSBTAG00000012302
cow	ENSF00000000390	ENSBTAP00000017043	ENSBTAP00000042104	ENSBTAG00000012827	ENSBTAG00000031481
cow	ENSF00000006327	ENSBTAP00000017302	ENSBTAP00000017882	ENSBTAG00000013014	ENSBTAG00000013442
cow	ENSF00000001960	ENSBTAP00000017639	ENSBTAP00000042043	ENSBTAG00000013264	ENSBTAG00000031440
cow	ENSF00000002558	ENSBTAP00000017770	ENSBTAP00000041157	ENSBTAG00000013358	ENSBTAG00000030834
cow	ENSF00000003575	ENSBTAP00000017892	ENSBTAP00000041394	ENSBTAG00000013450	ENSBTAG00000021166
cow	ENSF00000000239	ENSBTAP00000018186	ENSBTAP00000042076	ENSBTAG00000030507	ENSBTAG00000031469
cow	ENSF00000005192	ENSBTAP00000018218	ENSBTAP00000026906	ENSBTAG00000013711	ENSBTAG00000020203
cow	ENSF00000001484	ENSBTAP00000018327	ENSBTAP00000008122	ENSBTAG00000013782	ENSBTAG00000006179
cow	ENSF00000006316	ENSBTAP00000018406	ENSBTAP00000019145	ENSBTAG00000013858	ENSBTAG00000014397
cow	ENSF00000002585	ENSBTAP00000018491	ENSBTAP00000043524	ENSBTAG00000013924	ENSBTAG00000002330
cow	ENSF00000000580	ENSBTAP00000018697	ENSBTAP00000022474	ENSBTAG00000014072	ENSBTAG00000016897
cow	ENSF00000002538	ENSBTAP00000018917	ENSBTAP00000019801	ENSBTAG00000014233	ENSBTAG00000014871
cow	ENSF00000001035	ENSBTAP00000019057	ENSBTAP00000027342	ENSBTAG00000014333	ENSBTAG00000020523
cow	ENSF00000001345	ENSBTAP00000019747	ENSBTAP00000047045	ENSBTAG00000014827	ENSBTAG00000021843
cow	ENSF00000000332	ENSBTAP00000020096	ENSBTAP00000027565	ENSBTAG00000015101	ENSBTAG00000020685
cow	ENSF00000001176	ENSBTAP00000020133	ENSBTAP00000036877	ENSBTAG00000015133	ENSBTAG00000014496
cow	ENSF00000001029	ENSBTAP00000020322	ENSBTAP00000023059	ENSBTAG00000015280	ENSBTAG00000017345
cow	ENSF00000002414	ENSBTAP00000020332	ENSBTAP00000042120	ENSBTAG00000015293	ENSBTAG00000031496
cow	ENSF00000003789	ENSBTAP00000020656	ENSBTAP00000035495	ENSBTAG00000015546	ENSBTAG00000025372
cow	ENSF00000001992	ENSBTAP00000021206	ENSBTAP00000000730	ENSBTAG00000005211	ENSBTAG00000000560
cow	ENSF00000002552	ENSBTAP00000021340	ENSBTAP00000014445	ENSBTAG00000016039	ENSBTAG00000010873
cow	ENSF00000008466	ENSBTAP00000021425	ENSBTAP00000025556	ENSBTAG00000016093	ENSBTAG00000019199
cow	ENSF00000005830	ENSBTAP00000021677	ENSBTAP00000028907	ENSBTAG00000016295	ENSBTAG00000021693
cow	ENSF00000000034	ENSBTAP00000021872	ENSBTAP00000017500	ENSBTAG00000016451	ENSBTAG00000025441
cow	ENSF00000003228	ENSBTAP00000022046	ENSBTAP00000028452	ENSBTAG00000016572	ENSBTAG00000021344
cow	ENSF00000004873	ENSBTAP00000022463	ENSBTAP00000007219	ENSBTAG00000016887	ENSBTAG00000005491
cow	ENSF00000001610	ENSBTAP00000022540	ENSBTAP00000028527	ENSBTAG00000016947	ENSBTAG00000021402
cow	ENSF00000001477	ENSBTAP00000022569	ENSBTAP00000010069	ENSBTAG00000016968	ENSBTAG00000007654
cow	ENSF00000000087	ENSBTAP00000022954	ENSBTAP00000034404	ENSBTAG00000017274	ENSBTAG00000031030
cow	ENSF00000004078	ENSBTAP00000023735	ENSBTAP00000033566	ENSBTAG00000017856	ENSBTAG00000024334
cow	ENSF00000000381	ENSBTAP00000023770	ENSBTAP00000028357	ENSBTAG00000017884	ENSBTAG00000021283
cow	ENSF00000006936	ENSBTAP00000024396	ENSBTAP00000023773	ENSBTAG00000030832	ENSBTAG00000017881
cow	ENSF00000004138	ENSBTAP00000024915	ENSBTAP00000003750	ENSBTAG00000018718	ENSBTAG00000002887
cow	ENSF00000002647	ENSBTAP00000025484	ENSBTAP00000006762	ENSBTAG00000019147	ENSBTAG00000025414
cow	ENSF00000001841	ENSBTAP00000025617	ENSBTAP00000003768	ENSBTAG00000019237	ENSBTAG00000002900
cow	ENSF00000002780	ENSBTAP00000026531	ENSBTAP00000018200	ENSBTAG00000019914	ENSBTAG00000013700
cow	ENSF00000003303	ENSBTAP00000027123	ENSBTAP00000002541	ENSBTAG00000020353	ENSBTAG00000001955
cow	ENSF00000000130	ENSBTAP00000027204	ENSBTAP00000016159	ENSBTAG00000020412	ENSBTAG00000012182
cow	ENSF00000002697	ENSBTAP00000027627	ENSBTAP00000010263	ENSBTAG00000020733	ENSBTAG00000033009
cow	ENSF00000005520	ENSBTAP00000027736	ENSBTAP00000043811	ENSBTAG00000020814	ENSBTAG00000032757
cow	ENSF00000001729	ENSBTAP00000027875	ENSBTAP00000006853	ENSBTAG00000020927	ENSBTAG00000005202
cow	ENSF00000005445	ENSBTAP00000027942	ENSBTAP00000047075	ENSBTAG00000020981	ENSBTAG00000035882
cow	ENSF00000004973	ENSBTAP00000028257	ENSBTAP00000014674	ENSBTAG00000021205	ENSBTAG00000011050
cow	ENSF00000008641	ENSBTAP00000028498	ENSBTAP00000038740	ENSBTAG00000021377	ENSBTAG00000027160
cow	ENSF00000009092	ENSBTAP00000028542	ENSBTAP00000013705	ENSBTAG00000021410	ENSBTAG00000010385
cow	ENSF00000002690	ENSBTAP00000028543	ENSBTAP00000000177	ENSBTAG00000021411	ENSBTAG00000000154
cow	ENSF00000000746	ENSBTAP00000028703	ENSBTAP00000033554	ENSBTAG00000021539	ENSBTAG00000024326
cow	ENSF00000004565	ENSBTAP00000029040	ENSBTAP00000035711	ENSBTAG00000021787	ENSBTAG00000025494
cow	ENSF00000004761	ENSBTAP00000029320	ENSBTAP00000011826	ENSBTAG00000021988	ENSBTAG00000008987
cow	ENSF00000005976	ENSBTAP00000030487	ENSBTAP00000018542	ENSBTAG00000022535	ENSBTAG00000013959
cow	ENSF00000001896	ENSBTAP00000030686	ENSBTAP00000025865	ENSBTAG00000022656	ENSBTAG00000019416
cow	ENSF00000000316	ENSBTAP00000031568	ENSBTAP00000023641	ENSBTAG00000023247	ENSBTAG00000017778
cow	ENSF00000000001	ENSBTAP00000031942	ENSBTAP00000016898	ENSBTAG00000034377	ENSBTAG00000012716
cow	ENSF00000000202	ENSBTAP00000034572	ENSBTAP00000021523	ENSBTAG00000024903	ENSBTAG00000016170
cow	ENSF00000000700	ENSBTAP00000034741	ENSBTAP00000002660	ENSBTAG00000024992	ENSBTAG00000002054
cow	ENSF00000002879	ENSBTAP00000034976	ENSBTAP00000027187	ENSBTAG00000025099	ENSBTAG00000020399
cow	ENSF00000006665	ENSBTAP00000035380	ENSBTAP00000000110	ENSBTAG00000025297	ENSBTAG00000000101
cow	ENSF00000000117	ENSBTAP00000035423	ENSBTAP00000047203	ENSBTAG00000025340	ENSBTAG00000036027
cow	ENSF00000003219	ENSBTAP00000035509	ENSBTAP00000010313	ENSBTAG00000025379	ENSBTAG00000007839
cow	ENSF00000001541	ENSBTAP00000035611	ENSBTAP00000011308	ENSBTAG00000025434	ENSBTAG00000008573
cow	ENSF00000002865	ENSBTAP00000035660	ENSBTAP00000040321	ENSBTAG00000004524	ENSBTAG00000010317
cow	ENSF00000000336	ENSBTAP00000036110	ENSBTAP00000004106	ENSBTAG00000025669	ENSBTAG00000003164
cow	ENSF00000002445	ENSBTAP00000037200	ENSBTAP00000004630	ENSBTAG00000026327	ENSBTAG00000003560
cow	ENSF00000001851	ENSBTAP00000038286	ENSBTAP00000032732	ENSBTAG00000004361	ENSBTAG00000023879
cow	ENSF00000006719	ENSBTAP00000040182	ENSBTAP00000037319	ENSBTAG00000030164	ENSBTAG00000030185
cow	ENSF00000001072	ENSBTAP00000040941	ENSBTAP00000027683	ENSBTAG00000030674	ENSBTAG00000020774
cow	ENSF00000000164	ENSBTAP00000041814	ENSBTAP00000011206	ENSBTAG00000031277	ENSBTAG00000008501
cow	ENSF00000008774	ENSBTAP00000042502	ENSBTAP00000011851	ENSBTAG00000031800	ENSBTAG00000009002
cow	ENSF00000001312	ENSBTAP00000043205	ENSBTAP00000029890	ENSBTAG00000018198	ENSBTAG00000022161
cow	ENSF00000000691	ENSBTAP00000044048	ENSBTAP00000046878	ENSBTAG00000032956	ENSBTAG00000035644
cow	ENSF00000003635	ENSBTAP00000044058	ENSBTAP00000040614	ENSBTAG00000001979	ENSBTAG00000011945
cow	ENSF00000000251	ENSBTAP00000044168	ENSBTAP00000011468	ENSBTAG00000021694	ENSBTAG00000008704
cow	ENSF00000000072	ENSBTAP00000044187	ENSBTAP00000011886	ENSBTAG00000025689	ENSBTAG00000005520
cow	ENSF00000002061	ENSBTAP00000044260	ENSBTAP00000016528	ENSBTAG00000021499	ENSBTAG00000012458
cow	ENSF00000003061	ENSBTAP00000044936	ENSBTAP00000040759	ENSBTAG00000006427	ENSBTAG00000008881
cow	ENSF00000005834	ENSBTAP00000045192	ENSBTAP00000006484	ENSBTAG00000033891	ENSBTAG00000004928
cow	ENSF00000011273	ENSBTAP00000045674	ENSBTAP00000010851	ENSBTAG00000034360	ENSBTAG00000008247
cow	ENSF00000000591	ENSBTAP00000047117	ENSBTAP00000028724	ENSBTAG00000035921	ENSBTAG00000021559
rat	ENSF00000001072	ENSRNOP00000000134	ENSRNOP00000038260	ENSRNOG00000000122	ENSRNOG00000021489
rat	ENSF00000002552	ENSRNOP00000000325	ENSRNOP00000038593	ENSRNOG00000028658	ENSRNOG00000021745
rat	ENSF00000002847	ENSRNOP00000000466	ENSRNOP00000036972	ENSRNOG00000000410	ENSRNOG00000022428
rat	ENSF00000008963	ENSRNOP00000000580	ENSRNOP00000031710	ENSRNOG00000000488	ENSRNOG00000026969
rat	ENSF00000004485	ENSRNOP00000000717	ENSRNOP00000008286	ENSRNOG00000000587	ENSRNOG00000006321
rat	ENSF00000000922	ENSRNOP00000000743	ENSRNOP00000014077	ENSRNOG00000000605	ENSRNOG00000010598
rat	ENSF00000007818	ENSRNOP00000000911	ENSRNOP00000015146	ENSRNOG00000000720	ENSRNOG00000038965
rat	ENSF00000000095	ENSRNOP00000000974	ENSRNOP00000033053	ENSRNOG00000000747	ENSRNOG00000022244
rat	ENSF00000004809	ENSRNOP00000001121	ENSRNOP00000020210	ENSRNOG00000000845	ENSRNOG00000015067
rat	ENSF00000006665	ENSRNOP00000001179	ENSRNOP00000004285	ENSRNOG00000000881	ENSRNOG00000003214
rat	ENSF00000002428	ENSRNOP00000001247	ENSRNOP00000039019	ENSRNOG00000000938	ENSRNOG00000032913
rat	ENSF00000008016	ENSRNOP00000001490	ENSRNOP00000026268	ENSRNOG00000001128	ENSRNOG00000019427
rat	ENSF00000002361	ENSRNOP00000001543	ENSRNOP00000046027	ENSRNOG00000001166	ENSRNOG00000032667
rat	ENSF00000002538	ENSRNOP00000002169	ENSRNOP00000032192	ENSRNOG00000001592	ENSRNOG00000026461
rat	ENSF00000001663	ENSRNOP00000002241	ENSRNOP00000010923	ENSRNOG00000001644	ENSRNOG00000008046
rat	ENSF00000003789	ENSRNOP00000002285	ENSRNOP00000013431	ENSRNOG00000001680	ENSRNOG00000010126
rat	ENSF00000004444	ENSRNOP00000002361	ENSRNOP00000004034	ENSRNOG00000001733	ENSRNOG00000003021
rat	ENSF00000003451	ENSRNOP00000003145	ENSRNOP00000020613	ENSRNOG00000002285	ENSRNOG00000015369
rat	ENSF00000001206	ENSRNOP00000003390	ENSRNOP00000038276	ENSRNOG00000002467	ENSRNOG00000026928
rat	ENSF00000000593	ENSRNOP00000003441	ENSRNOP00000000907	ENSRNOG00000002549	ENSRNOG00000000716
rat	ENSF00000007629	ENSRNOP00000003674	ENSRNOP00000042135	ENSRNOG00000002721	ENSRNOG00000034182
rat	ENSF00000010203	ENSRNOP00000003785	ENSRNOP00000046473	ENSRNOG00000002816	ENSRNOG00000032861
rat	ENSF00000000537	ENSRNOP00000003789	ENSRNOP00000006165	ENSRNOG00000038035	ENSRNOG00000004671
rat	ENSF00000000418	ENSRNOP00000004462	ENSRNOP00000017012	ENSRNOG00000003354	ENSRNOG00000029749
rat	ENSF00000000001	ENSRNOP00000004589	ENSRNOP00000011032	ENSRNOG00000003455	ENSRNOG00000008239
rat	ENSF00000001355	ENSRNOP00000004867	ENSRNOP00000044856	ENSRNOG00000003670	ENSRNOG00000032840
rat	ENSF00000001088	ENSRNOP00000004979	ENSRNOP00000019315	ENSRNOG00000003746	ENSRNOG00000014408
rat	ENSF00000003800	ENSRNOP00000005292	ENSRNOP00000021855	ENSRNOG00000003918	ENSRNOG00000016331
rat	ENSF00000003303	ENSRNOP00000005370	ENSRNOP00000026601	ENSRNOG00000003975	ENSRNOG00000019657
rat	ENSF00000006503	ENSRNOP00000005457	ENSRNOP00000001050	ENSRNOG00000004016	ENSRNOG00000000801
rat	ENSF00000002465	ENSRNOP00000005516	ENSRNOP00000000173	ENSRNOG00000024945	ENSRNOG00000024138
rat	ENSF00000004434	ENSRNOP00000005719	ENSRNOP00000004798	ENSRNOG00000004245	ENSRNOG00000003606
rat	ENSF00000000134	ENSRNOP00000005755	ENSRNOP00000040477	ENSRNOG00000004060	ENSRNOG00000030871
rat	ENSF00000004617	ENSRNOP00000006223	ENSRNOP00000004086	ENSRNOG00000004474	ENSRNOG00000003062
rat	ENSF00000006948	ENSRNOP00000006321	ENSRNOP00000007636	ENSRNOG00000004751	ENSRNOG00000024604
rat	ENSF00000005822	ENSRNOP00000006892	ENSRNOP00000048876	ENSRNOG00000004814	ENSRNOG00000033199
rat	ENSF00000000202	ENSRNOP00000007335	ENSRNOP00000010146	ENSRNOG00000005369	ENSRNOG00000007705
rat	ENSF00000000062	ENSRNOP00000008094	ENSRNOP00000050213	ENSRNOG00000030056	ENSRNOG00000033057
rat	ENSF00000000034	ENSRNOP00000008504	ENSRNOP00000050605	ENSRNOG00000006472	ENSRNOG00000033526
rat	ENSF00000004121	ENSRNOP00000008608	ENSRNOP00000049509	ENSRNOG00000006589	ENSRNOG00000033613
rat	ENSF00000000182	ENSRNOP00000008643	ENSRNOP00000004118	ENSRNOG00000006308	ENSRNOG00000003085
rat	ENSF00000002115	ENSRNOP00000008655	ENSRNOP00000012844	ENSRNOG00000006368	ENSRNOG00000009691
rat	ENSF00000003138	ENSRNOP00000009046	ENSRNOP00000054703	ENSRNOG00000016387	ENSRNOG00000038045
rat	ENSF00000000593	ENSRNOP00000009317	ENSRNOP00000013618	ENSRNOG00000007066	ENSRNOG00000010254
rat	ENSF00000000001	ENSRNOP00000009584	ENSRNOP00000041481	ENSRNOG00000006972	ENSRNOG00000030750
rat	ENSF00000001470	ENSRNOP00000009815	ENSRNOP00000028681	ENSRNOG00000007235	ENSRNOG00000021123
rat	ENSF00000000001	ENSRNOP00000010377	ENSRNOP00000017971	ENSRNOG00000007707	ENSRNOG00000013460
rat	ENSF00000000098	ENSRNOP00000010450	ENSRNOP00000008415	ENSRNOG00000007954	ENSRNOG00000006428
rat	ENSF00000005520	ENSRNOP00000010555	ENSRNOP00000012048	ENSRNOG00000008026	ENSRNOG00000009106
rat	ENSF00000008654	ENSRNOP00000010612	ENSRNOP00000005884	ENSRNOG00000007956	ENSRNOG00000004453
rat	ENSF00000003790	ENSRNOP00000010753	ENSRNOP00000011446	ENSRNOG00000007851	ENSRNOG00000022652
rat	ENSF00000003142	ENSRNOP00000011175	ENSRNOP00000053230	ENSRNOG00000007998	ENSRNOG00000011606
rat	ENSF00000008748	ENSRNOP00000011183	ENSRNOP00000007357	ENSRNOG00000008329	ENSRNOG00000005572
rat	ENSF00000001567	ENSRNOP00000011312	ENSRNOP00000011092	ENSRNOG00000008320	ENSRNOG00000022308
rat	ENSF00000000263	ENSRNOP00000011556	ENSRNOP00000003068	ENSRNOG00000008212	ENSRNOG00000002253
rat	ENSF00000000018	ENSRNOP00000011773	ENSRNOP00000022395	ENSRNOG00000008536	ENSRNOG00000016641
rat	ENSF00000002605	ENSRNOP00000011948	ENSRNOP00000003458	ENSRNOG00000008965	ENSRNOG00000002568
rat	ENSF00000006129	ENSRNOP00000011999	ENSRNOP00000027972	ENSRNOG00000009068	ENSRNOG00000020614
rat	ENSF00000004279	ENSRNOP00000012036	ENSRNOP00000057482	ENSRNOG00000008641	ENSRNOG00000039626
rat	ENSF00000000302	ENSRNOP00000012170	ENSRNOP00000058695	ENSRNOG00000009118	ENSRNOG00000013833
rat	ENSF00000006897	ENSRNOP00000012765	ENSRNOP00000006791	ENSRNOG00000009635	ENSRNOG00000005114
rat	ENSF00000001844	ENSRNOP00000012842	ENSRNOP00000008390	ENSRNOG00000009530	ENSRNOG00000006401
rat	ENSF00000001311	ENSRNOP00000013116	ENSRNOP00000026355	ENSRNOG00000009730	ENSRNOG00000019481
rat	ENSF00000001510	ENSRNOP00000013124	ENSRNOP00000013551	ENSRNOG00000009280	ENSRNOG00000010172
rat	ENSF00000001129	ENSRNOP00000013170	ENSRNOP00000027469	ENSRNOG00000009922	ENSRNOG00000020282
rat	ENSF00000000475	ENSRNOP00000013393	ENSRNOP00000041760	ENSRNOG00000010105	ENSRNOG00000040101
rat	ENSF00000004973	ENSRNOP00000013507	ENSRNOP00000020475	ENSRNOG00000010068	ENSRNOG00000015268
rat	ENSF00000000022	ENSRNOP00000013608	ENSRNOP00000017180	ENSRNOG00000009439	ENSRNOG00000012863
rat	ENSF00000001912	ENSRNOP00000013720	ENSRNOP00000045686	ENSRNOG00000010238	ENSRNOG00000034071
rat	ENSF00000000260	ENSRNOP00000013919	ENSRNOP00000058407	ENSRNOG00000010306	ENSRNOG00000031564
rat	ENSF00000007807	ENSRNOP00000014407	ENSRNOP00000047755	ENSRNOG00000010807	ENSRNOG00000032602
rat	ENSF00000000888	ENSRNOP00000014570	ENSRNOP00000000661	ENSRNOG00000010972	ENSRNOG00000024413
rat	ENSF00000004008	ENSRNOP00000014632	ENSRNOP00000058305	ENSRNOG00000010587	ENSRNOG00000040045
rat	ENSF00000001348	ENSRNOP00000014849	ENSRNOP00000046425	ENSRNOG00000011138	ENSRNOG00000032097
rat	ENSF00000001831	ENSRNOP00000014905	ENSRNOP00000030980	ENSRNOG00000011104	ENSRNOG00000028747
rat	ENSF00000007386	ENSRNOP00000014928	ENSRNOP00000056194	ENSRNOG00000011239	ENSRNOG00000038889
rat	ENSF00000003861	ENSRNOP00000015043	ENSRNOP00000018486	ENSRNOG00000011226	ENSRNOG00000013835
rat	ENSF00000001136	ENSRNOP00000015331	ENSRNOP00000049742	ENSRNOG00000011329	ENSRNOG00000038114
rat	ENSF00000000963	ENSRNOP00000015875	ENSRNOP00000055494	ENSRNOG00000023786	ENSRNOG00000030807
rat	ENSF00000002651	ENSRNOP00000015967	ENSRNOP00000015883	ENSRNOG00000011535	ENSRNOG00000011941
rat	ENSF00000006482	ENSRNOP00000016172	ENSRNOP00000051577	ENSRNOG00000012151	ENSRNOG00000027312
rat	ENSF00000001950	ENSRNOP00000016237	ENSRNOP00000040852	ENSRNOG00000011771	ENSRNOG00000030645
rat	ENSF00000003674	ENSRNOP00000016464	ENSRNOP00000025179	ENSRNOG00000012348	ENSRNOG00000018582
rat	ENSF00000002708	ENSRNOP00000016495	ENSRNOP00000020845	ENSRNOG00000011905	ENSRNOG00000015566
rat	ENSF00000000381	ENSRNOP00000016757	ENSRNOP00000033496	ENSRNOG00000012566	ENSRNOG00000024310
rat	ENSF00000000354	ENSRNOP00000016907	ENSRNOP00000026098	ENSRNOG00000012674	ENSRNOG00000019217
rat	ENSF00000000396	ENSRNOP00000017254	ENSRNOP00000008008	ENSRNOG00000012630	ENSRNOG00000021403
rat	ENSF00000000485	ENSRNOP00000017468	ENSRNOP00000012585	ENSRNOG00000013009	ENSRNOG00000009373
rat	ENSF00000008275	ENSRNOP00000017955	ENSRNOP00000011848	ENSRNOG00000013438	ENSRNOG00000008962
rat	ENSF00000000532	ENSRNOP00000018828	ENSRNOP00000030832	ENSRNOG00000014082	ENSRNOG00000023551
rat	ENSF00000009255	ENSRNOP00000019141	ENSRNOP00000045825	ENSRNOG00000014224	ENSRNOG00000029868
rat	ENSF00000001437	ENSRNOP00000019154	ENSRNOP00000033843	ENSRNOG00000014282	ENSRNOG00000025114
rat	ENSF00000002586	ENSRNOP00000019162	ENSRNOP00000046281	ENSRNOG00000014272	ENSRNOG00000030364
rat	ENSF00000001029	ENSRNOP00000019225	ENSRNOP00000003421	ENSRNOG00000014000	ENSRNOG00000002535
rat	ENSF00000000790	ENSRNOP00000019508	ENSRNOP00000055288	ENSRNOG00000014179	ENSRNOG00000032289
rat	ENSF00000002700	ENSRNOP00000019539	ENSRNOP00000038050	ENSRNOG00000014529	ENSRNOG00000023261
rat	ENSF00000006015	ENSRNOP00000019556	ENSRNOP00000020345	ENSRNOG00000039528	ENSRNOG00000015168
rat	ENSF00000002327	ENSRNOP00000020265	ENSRNOP00000032461	ENSRNOG00000015078	ENSRNOG00000021674
rat	ENSF00000000134	ENSRNOP00000020348	ENSRNOP00000021955	ENSRNOG00000015155	ENSRNOG00000016409
rat	ENSF00000002188	ENSRNOP00000020635	ENSRNOP00000047879	ENSRNOG00000015335	ENSRNOG00000032595
rat	ENSF00000000556	ENSRNOP00000020656	ENSRNOP00000019473	ENSRNOG00000015260	ENSRNOG00000014524
rat	ENSF00000002062	ENSRNOP00000020681	ENSRNOP00000004747	ENSRNOG00000014765	ENSRNOG00000003575
rat	ENSF00000004388	ENSRNOP00000021135	ENSRNOP00000010156	ENSRNOG00000015667	ENSRNOG00000007740
rat	ENSF00000001261	ENSRNOP00000021215	ENSRNOP00000047214	ENSRNOG00000015823	ENSRNOG00000032797
rat	ENSF00000000202	ENSRNOP00000021507	ENSRNOP00000006238	ENSRNOG00000016057	ENSRNOG00000004713
rat	ENSF00000004788	ENSRNOP00000021562	ENSRNOP00000005433	ENSRNOG00000015984	ENSRNOG00000004092
rat	ENSF00000002451	ENSRNOP00000021763	ENSRNOP00000025225	ENSRNOG00000015976	ENSRNOG00000018685
rat	ENSF00000010899	ENSRNOP00000021864	ENSRNOP00000054937	ENSRNOG00000016322	ENSRNOG00000038184
rat	ENSF00000002627	ENSRNOP00000021972	ENSRNOP00000034357	ENSRNOG00000026136	ENSRNOG00000024230
rat	ENSF00000000801	ENSRNOP00000022064	ENSRNOP00000045480	ENSRNOG00000016480	ENSRNOG00000019107
rat	ENSF00000005456	ENSRNOP00000022089	ENSRNOP00000008695	ENSRNOG00000016470	ENSRNOG00000006660
rat	ENSF00000001998	ENSRNOP00000022184	ENSRNOP00000041932	ENSRNOG00000016411	ENSRNOG00000033913
rat	ENSF00000007621	ENSRNOP00000022367	ENSRNOP00000046599	ENSRNOG00000016507	ENSRNOG00000030286
rat	ENSF00000001590	ENSRNOP00000022574	ENSRNOP00000035804	ENSRNOG00000016810	ENSRNOG00000022375
rat	ENSF00000000364	ENSRNOP00000023205	ENSRNOP00000001973	ENSRNOG00000016848	ENSRNOG00000001452
rat	ENSF00000003303	ENSRNOP00000023469	ENSRNOP00000020457	ENSRNOG00000017427	ENSRNOG00000015256
rat	ENSF00000008370	ENSRNOP00000023515	ENSRNOP00000001416	ENSRNOG00000017372	ENSRNOG00000001071
rat	ENSF00000000999	ENSRNOP00000023724	ENSRNOP00000019033	ENSRNOG00000017417	ENSRNOG00000038106
rat	ENSF00000000304	ENSRNOP00000024106	ENSRNOP00000002064	ENSRNOG00000017895	ENSRNOG00000001512
rat	ENSF00000004985	ENSRNOP00000024179	ENSRNOP00000032879	ENSRNOG00000017758	ENSRNOG00000027533
rat	ENSF00000000329	ENSRNOP00000024516	ENSRNOP00000048979	ENSRNOG00000018208	ENSRNOG00000032132
rat	ENSF00000000336	ENSRNOP00000024578	ENSRNOP00000043462	ENSRNOG00000018267	ENSRNOG00000014471
rat	ENSF00000002818	ENSRNOP00000024697	ENSRNOP00000040083	ENSRNOG00000018125	ENSRNOG00000030632
rat	ENSF00000001073	ENSRNOP00000024991	ENSRNOP00000021452	ENSRNOG00000018528	ENSRNOG00000016037
rat	ENSF00000008257	ENSRNOP00000025380	ENSRNOP00000039421	ENSRNOG00000018787	ENSRNOG00000031634
rat	ENSF00000001330	ENSRNOP00000025683	ENSRNOP00000019454	ENSRNOG00000018988	ENSRNOG00000014520
rat	ENSF00000001897	ENSRNOP00000025694	ENSRNOP00000041060	ENSRNOG00000019004	ENSRNOG00000028841
rat	ENSF00000002030	ENSRNOP00000025796	ENSRNOP00000006662	ENSRNOG00000018768	ENSRNOG00000005017
rat	ENSF00000001746	ENSRNOP00000025887	ENSRNOP00000051327	ENSRNOG00000019041	ENSRNOG00000014510
rat	ENSF00000003084	ENSRNOP00000026021	ENSRNOP00000020554	ENSRNOG00000019229	ENSRNOG00000015303
rat	ENSF00000000390	ENSRNOP00000026269	ENSRNOP00000043132	ENSRNOG00000019339	ENSRNOG00000033901
rat	ENSF00000001869	ENSRNOP00000026582	ENSRNOP00000003780	ENSRNOG00000024177	ENSRNOG00000002828
rat	ENSF00000000627	ENSRNOP00000026737	ENSRNOP00000006524	ENSRNOG00000019753	ENSRNOG00000004918
rat	ENSF00000004978	ENSRNOP00000026989	ENSRNOP00000020344	ENSRNOG00000019934	ENSRNOG00000015167
rat	ENSF00000000482	ENSRNOP00000027761	ENSRNOP00000023079	ENSRNOG00000026109	ENSRNOG00000017187
rat	ENSF00000002780	ENSRNOP00000027868	ENSRNOP00000054742	ENSRNOG00000020513	ENSRNOG00000038076
rat	ENSF00000000336	ENSRNOP00000027964	ENSRNOP00000011286	ENSRNOG00000020606	ENSRNOG00000008544
rat	ENSF00000000627	ENSRNOP00000028189	ENSRNOP00000024372	ENSRNOG00000020779	ENSRNOG00000018116
rat	ENSF00000000113	ENSRNOP00000028525	ENSRNOP00000006355	ENSRNOG00000021010	ENSRNOG00000004791
rat	ENSF00000004371	ENSRNOP00000028752	ENSRNOP00000041035	ENSRNOG00000021175	ENSRNOG00000009072
rat	ENSF00000001124	ENSRNOP00000029151	ENSRNOP00000020736	ENSRNOG00000023778	ENSRNOG00000022398
rat	ENSF00000011258	ENSRNOP00000030464	ENSRNOP00000006510	ENSRNOG00000025200	ENSRNOG00000004914
rat	ENSF00000000192	ENSRNOP00000030877	ENSRNOP00000038706	ENSRNOG00000026164	ENSRNOG00000021557
rat	ENSF00000000643	ENSRNOP00000031940	ENSRNOP00000041393	ENSRNOG00000023647	ENSRNOG00000030869
rat	ENSF00000004672	ENSRNOP00000032124	ENSRNOP00000020352	ENSRNOG00000026662	ENSRNOG00000027724
rat	ENSF00000011926	ENSRNOP00000032358	ENSRNOP00000051894	ENSRNOG00000028414	ENSRNOG00000036711
rat	ENSF00000002208	ENSRNOP00000032903	ENSRNOP00000005511	ENSRNOG00000026260	ENSRNOG00000004163
rat	ENSF00000002336	ENSRNOP00000033184	ENSRNOP00000013001	ENSRNOG00000026014	ENSRNOG00000009815
rat	ENSF00000004873	ENSRNOP00000033634	ENSRNOP00000000260	ENSRNOG00000024601	ENSRNOG00000027511
rat	ENSF00000000251	ENSRNOP00000033763	ENSRNOP00000006175	ENSRNOG00000027136	ENSRNOG00000004679
rat	ENSF00000000354	ENSRNOP00000034820	ENSRNOP00000007074	ENSRNOG00000023688	ENSRNOG00000005338
rat	ENSF00000006619	ENSRNOP00000034899	ENSRNOP00000045495	ENSRNOG00000029089	ENSRNOG00000030619
rat	ENSF00000000888	ENSRNOP00000035219	ENSRNOP00000000432	ENSRNOG00000025164	ENSRNOG00000000384
rat	ENSF00000002246	ENSRNOP00000035280	ENSRNOP00000022226	ENSRNOG00000025545	ENSRNOG00000016597
rat	ENSF00000000702	ENSRNOP00000035797	ENSRNOP00000053097	ENSRNOG00000027408	ENSRNOG00000037230
rat	ENSF00000006319	ENSRNOP00000035954	ENSRNOP00000000745	ENSRNOG00000024661	ENSRNOG00000000607
rat	ENSF00000002162	ENSRNOP00000035978	ENSRNOP00000008442	ENSRNOG00000021183	ENSRNOG00000006455
rat	ENSF00000000757	ENSRNOP00000036106	ENSRNOP00000033802	ENSRNOG00000026455	ENSRNOG00000025214
rat	ENSF00000001639	ENSRNOP00000036369	ENSRNOP00000026825	ENSRNOG00000026466	ENSRNOG00000019732
rat	ENSF00000000959	ENSRNOP00000036391	ENSRNOP00000049652	ENSRNOG00000023344	ENSRNOG00000030614
rat	ENSF00000003208	ENSRNOP00000036419	ENSRNOP00000036127	ENSRNOG00000028286	ENSRNOG00000027059
rat	ENSF00000001388	ENSRNOP00000036514	ENSRNOP00000053082	ENSRNOG00000023529	ENSRNOG00000037220
rat	ENSF00000001851	ENSRNOP00000036623	ENSRNOP00000000558	ENSRNOG00000026907	ENSRNOG00000000476
rat	ENSF00000006046	ENSRNOP00000037323	ENSRNOP00000042798	ENSRNOG00000023850	ENSRNOG00000033891
rat	ENSF00000002974	ENSRNOP00000037372	ENSRNOP00000003022	ENSRNOG00000027791	ENSRNOG00000002223
rat	ENSF00000002450	ENSRNOP00000038007	ENSRNOP00000056171	ENSRNOG00000005366	ENSRNOG00000002477
rat	ENSF00000001097	ENSRNOP00000038287	ENSRNOP00000004038	ENSRNOG00000004457	ENSRNOG00000003025
rat	ENSF00000002049	ENSRNOP00000038501	ENSRNOP00000051446	ENSRNOG00000022863	ENSRNOG00000032569
rat	ENSF00000000130	ENSRNOP00000038798	ENSRNOP00000019340	ENSRNOG00000023687	ENSRNOG00000014420
rat	ENSF00000000238	ENSRNOP00000039027	ENSRNOP00000054374	ENSRNOG00000002953	ENSRNOG00000037884
rat	ENSF00000004477	ENSRNOP00000039435	ENSRNOP00000047070	ENSRNOG00000031169	ENSRNOG00000032534
rat	ENSF00000000700	ENSRNOP00000039454	ENSRNOP00000038943	ENSRNOG00000034241	ENSRNOG00000028984
rat	ENSF00000000302	ENSRNOP00000040234	ENSRNOP00000009043	ENSRNOG00000038909	ENSRNOG00000006908
rat	ENSF00000000624	ENSRNOP00000040672	ENSRNOP00000032833	ENSRNOG00000002708	ENSRNOG00000026582
rat	ENSF00000000529	ENSRNOP00000040699	ENSRNOP00000019983	ENSRNOG00000029165	ENSRNOG00000014902
rat	ENSF00000002760	ENSRNOP00000040750	ENSRNOP00000018896	ENSRNOG00000021151	ENSRNOG00000014123
rat	ENSF00000000064	ENSRNOP00000041898	ENSRNOP00000031231	ENSRNOG00000034080	ENSRNOG00000024200
rat	ENSF00000000095	ENSRNOP00000041902	ENSRNOP00000000973	ENSRNOG00000031457	ENSRNOG00000000746
rat	ENSF00000010439	ENSRNOP00000042070	ENSRNOP00000039847	ENSRNOG00000029875	ENSRNOG00000034128
rat	ENSF00000000001	ENSRNOP00000042506	ENSRNOP00000026204	ENSRNOG00000034037	ENSRNOG00000019376
rat	ENSF00000005830	ENSRNOP00000044167	ENSRNOP00000025408	ENSRNOG00000039556	ENSRNOG00000018812
rat	ENSF00000003464	ENSRNOP00000044234	ENSRNOP00000010673	ENSRNOG00000029798	ENSRNOG00000008098
rat	ENSF00000000140	ENSRNOP00000045087	ENSRNOP00000039621	ENSRNOG00000013741	ENSRNOG00000034016
rat	ENSF00000002318	ENSRNOP00000045166	ENSRNOP00000013030	ENSRNOG00000007892	ENSRNOG00000009835
rat	ENSF00000000260	ENSRNOP00000045180	ENSRNOP00000053173	ENSRNOG00000007026	ENSRNOG00000037266
rat	ENSF00000005263	ENSRNOP00000045732	ENSRNOP00000016420	ENSRNOG00000032419	ENSRNOG00000012333
rat	ENSF00000002662	ENSRNOP00000045882	ENSRNOP00000054772	ENSRNOG00000031593	ENSRNOG00000038088
rat	ENSF00000000402	ENSRNOP00000045952	ENSRNOP00000027128	ENSRNOG00000011881	ENSRNOG00000027359
rat	ENSF00000000001	ENSRNOP00000046722	ENSRNOP00000011041	ENSRNOG00000010699	ENSRNOG00000008362
rat	ENSF00000000192	ENSRNOP00000046916	ENSRNOP00000008805	ENSRNOG00000029697	ENSRNOG00000006746
rat	ENSF00000000064	ENSRNOP00000046933	ENSRNOP00000039697	ENSRNOG00000039143	ENSRNOG00000031795
rat	ENSF00000001999	ENSRNOP00000046992	ENSRNOP00000043693	ENSRNOG00000030106	ENSRNOG00000031299
rat	ENSF00000002336	ENSRNOP00000047253	ENSRNOP00000023030	ENSRNOG00000033970	ENSRNOG00000017160
rat	ENSF00000000011	ENSRNOP00000047291	ENSRNOP00000035903	ENSRNOG00000029477	ENSRNOG00000027449
rat	ENSF00000001114	ENSRNOP00000047715	ENSRNOP00000049794	ENSRNOG00000037286	ENSRNOG00000031286
rat	ENSF00000000790	ENSRNOP00000047760	ENSRNOP00000057658	ENSRNOG00000030174	ENSRNOG00000001936
rat	ENSF00000000228	ENSRNOP00000047761	ENSRNOP00000054509	ENSRNOG00000033097	ENSRNOG00000037939
rat	ENSF00000000592	ENSRNOP00000047810	ENSRNOP00000020233	ENSRNOG00000038540	ENSRNOG00000015061
rat	ENSF00000001689	ENSRNOP00000048294	ENSRNOP00000034240	ENSRNOG00000031864	ENSRNOG00000025284
rat	ENSF00000006844	ENSRNOP00000048468	ENSRNOP00000007338	ENSRNOG00000030180	ENSRNOG00000005555
rat	ENSF00000002440	ENSRNOP00000048485	ENSRNOP00000051020	ENSRNOG00000033391	ENSRNOG00000031493
rat	ENSF00000003693	ENSRNOP00000048854	ENSRNOP00000012067	ENSRNOG00000005118	ENSRNOG00000009114
rat	ENSF00000010638	ENSRNOP00000048873	ENSRNOP00000018362	ENSRNOG00000031449	ENSRNOG00000013740
rat	ENSF00000003635	ENSRNOP00000048993	ENSRNOP00000029450	ENSRNOG00000026315	ENSRNOG00000022632
rat	ENSF00000002351	ENSRNOP00000049563	ENSRNOP00000054125	ENSRNOG00000031479	ENSRNOG00000031294
rat	ENSF00000001114	ENSRNOP00000049748	ENSRNOP00000039515	ENSRNOG00000025606	ENSRNOG00000029974
rat	ENSF00000002348	ENSRNOP00000050146	ENSRNOP00000012085	ENSRNOG00000001789	ENSRNOG00000009099
rat	ENSF00000004405	ENSRNOP00000050253	ENSRNOP00000021014	ENSRNOG00000029606	ENSRNOG00000027798
rat	ENSF00000001288	ENSRNOP00000051158	ENSRNOP00000034023	ENSRNOG00000006797	ENSRNOG00000028441
rat	ENSF00000006821	ENSRNOP00000051843	ENSRNOP00000030541	ENSRNOG00000036691	ENSRNOG00000023936
rat	ENSF00000002267	ENSRNOP00000052107	ENSRNOP00000039918	ENSRNOG00000028776	ENSRNOG00000029850
rat	ENSF00000005310	ENSRNOP00000052773	ENSRNOP00000029551	ENSRNOG00000013423	ENSRNOG00000024560
rat	ENSF00000001624	ENSRNOP00000053123	ENSRNOP00000047948	ENSRNOG00000027149	ENSRNOG00000029958
rat	ENSF00000001035	ENSRNOP00000053155	ENSRNOP00000051406	ENSRNOG00000037252	ENSRNOG00000032426
rat	ENSF00000002009	ENSRNOP00000053162	ENSRNOP00000018987	ENSRNOG00000037259	ENSRNOG00000014185
rat	ENSF00000003058	ENSRNOP00000054398	ENSRNOP00000042992	ENSRNOG00000005975	ENSRNOG00000032825
rat	ENSF00000000134	ENSRNOP00000055238	ENSRNOP00000038123	ENSRNOG00000012370	ENSRNOG00000028576
rat	ENSF00000005187	ENSRNOP00000055310	ENSRNOP00000055963	ENSRNOG00000006977	ENSRNOG00000025637
rat	ENSF00000001348	ENSRNOP00000055449	ENSRNOP00000048267	ENSRNOG00000031991	ENSRNOG00000033224
rat	ENSF00000003782	ENSRNOP00000056260	ENSRNOP00000052873	ENSRNOG00000018774	ENSRNOG00000031585
rat	ENSF00000000260	ENSRNOP00000056469	ENSRNOP00000044986	ENSRNOG00000010386	ENSRNOG00000033045
rat	ENSF00000000259	ENSRNOP00000056868	ENSRNOP00000054737	ENSRNOG00000039253	ENSRNOG00000038072
rat	ENSF00000001960	ENSRNOP00000056960	ENSRNOP00000044943	ENSRNOG00000009695	ENSRNOG00000033186
rat	ENSF00000002119	ENSRNOP00000058120	ENSRNOP00000035925	ENSRNOG00000039962	ENSRNOG00000024915
rat	ENSF00000004994	ENSRNOP00000058526	ENSRNOP00000018685	ENSRNOG00000040166	ENSRNOG00000013937
rat	ENSF00000000062	ENSRNOP00000058655	ENSRNOP00000031837	ENSRNOG00000040246	ENSRNOG00000024841
macaca	ENSF00000001639	ENSMMUP00000000255	ENSMMUP00000026576	ENSMMUG00000000181	ENSMMUG00000020183
macaca	ENSF00000000064	ENSMMUP00000000472	ENSMMUP00000022885	ENSMMUG00000000352	ENSMMUG00000017385
macaca	ENSF00000000018	ENSMMUP00000000833	ENSMMUP00000025431	ENSMMUG00000000621	ENSMMUG00000019355
macaca	ENSF00000000381	ENSMMUP00000000919	ENSMMUP00000003775	ENSMMUG00000000683	ENSMMUG00000002825
macaca	ENSF00000007404	ENSMMUP00000001149	ENSMMUP00000030411	ENSMMUG00000000854	ENSMMUG00000023102
macaca	ENSF00000003594	ENSMMUP00000001153	ENSMMUP00000011066	ENSMMUG00000000858	ENSMMUG00000008440
macaca	ENSF00000000888	ENSMMUP00000001878	ENSMMUP00000003498	ENSMMUG00000001404	ENSMMUG00000002604
macaca	ENSF00000001969	ENSMMUP00000001895	ENSMMUP00000032566	ENSMMUG00000001415	ENSMMUG00000006781
macaca	ENSF00000002318	ENSMMUP00000002015	ENSMMUP00000015467	ENSMMUG00000001516	ENSMMUG00000011778
macaca	ENSF00000005639	ENSMMUP00000002100	ENSMMUP00000024051	ENSMMUG00000001571	ENSMMUG00000018296
macaca	ENSF00000001156	ENSMMUP00000002196	ENSMMUP00000027267	ENSMMUG00000001645	ENSMMUG00000020716
macaca	ENSF00000002803	ENSMMUP00000002238	ENSMMUP00000039436	ENSMMUG00000001671	ENSMMUG00000031842
macaca	ENSF00000000300	ENSMMUP00000002611	ENSMMUP00000033818	ENSMMUG00000001954	ENSMMUG00000029761
macaca	ENSF00000003928	ENSMMUP00000002871	ENSMMUP00000004180	ENSMMUG00000002152	ENSMMUG00000003126
macaca	ENSF00000000111	ENSMMUP00000002883	ENSMMUP00000004823	ENSMMUG00000002163	ENSMMUG00000003613
macaca	ENSF00000005349	ENSMMUP00000002946	ENSMMUP00000004976	ENSMMUG00000002203	ENSMMUG00000003732
macaca	ENSF00000000095	ENSMMUP00000003546	ENSMMUP00000003547	ENSMMUG00000002633	ENSMMUG00000029872
macaca	ENSF00000000113	ENSMMUP00000003743	ENSMMUP00000028220	ENSMMUG00000002792	ENSMMUG00000021421
macaca	ENSF00000005421	ENSMMUP00000003855	ENSMMUP00000036037	ENSMMUG00000002888	ENSMMUG00000030621
macaca	ENSF00000001663	ENSMMUP00000003937	ENSMMUP00000009524	ENSMMUG00000002946	ENSMMUG00000007264
macaca	ENSF00000000482	ENSMMUP00000004045	ENSMMUP00000008938	ENSMMUG00000003029	ENSMMUG00000006802
macaca	ENSF00000001484	ENSMMUP00000004244	ENSMMUP00000025137	ENSMMUG00000003176	ENSMMUG00000019117
macaca	ENSF00000006831	ENSMMUP00000004373	ENSMMUP00000037028	ENSMMUG00000003283	ENSMMUG00000018859
macaca	ENSF00000001615	ENSMMUP00000004386	ENSMMUP00000026556	ENSMMUG00000003295	ENSMMUG00000029338
macaca	ENSF00000002805	ENSMMUP00000004669	ENSMMUP00000004448	ENSMMUG00000003505	ENSMMUG00000003342
macaca	ENSF00000000508	ENSMMUP00000004729	ENSMMUP00000041183	ENSMMUG00000003552	ENSMMUG00000014993
macaca	ENSF00000000350	ENSMMUP00000004771	ENSMMUP00000026833	ENSMMUG00000030453	ENSMMUG00000020393
macaca	ENSF00000000336	ENSMMUP00000005162	ENSMMUP00000028675	ENSMMUG00000003868	ENSMMUG00000021775
macaca	ENSF00000009384	ENSMMUP00000005860	ENSMMUP00000027266	ENSMMUG00000004385	ENSMMUG00000020714
macaca	ENSF00000009121	ENSMMUP00000006051	ENSMMUP00000006052	ENSMMUG00000004552	ENSMMUG00000004554
macaca	ENSF00000000663	ENSMMUP00000006212	ENSMMUP00000012758	ENSMMUG00000004674	ENSMMUG00000009748
macaca	ENSF00000004438	ENSMMUP00000006223	ENSMMUP00000035805	ENSMMUG00000004682	ENSMMUG00000030530
macaca	ENSF00000001388	ENSMMUP00000006721	ENSMMUP00000041365	ENSMMUG00000030025	ENSMMUG00000032596
macaca	ENSF00000001020	ENSMMUP00000006872	ENSMMUP00000041371	ENSMMUG00000005194	ENSMMUG00000004310
macaca	ENSF00000001355	ENSMMUP00000006935	ENSMMUP00000027912	ENSMMUG00000005240	ENSMMUG00000021194
macaca	ENSF00000000001	ENSMMUP00000006938	ENSMMUP00000003064	ENSMMUG00000005242	ENSMMUG00000002292
macaca	ENSF00000001630	ENSMMUP00000007110	ENSMMUP00000004521	ENSMMUG00000005377	ENSMMUG00000003389
macaca	ENSF00000000496	ENSMMUP00000007284	ENSMMUP00000003508	ENSMMUG00000005513	ENSMMUG00000002612
macaca	ENSF00000000001	ENSMMUP00000007517	ENSMMUP00000007518	ENSMMUG00000005694	ENSMMUG00000005695
macaca	ENSF00000000098	ENSMMUP00000007593	ENSMMUP00000037558	ENSMMUG00000005753	ENSMMUG00000023546
macaca	ENSF00000000001	ENSMMUP00000007747	ENSMMUP00000039063	ENSMMUG00000004021	ENSMMUG00000005369
macaca	ENSF00000008297	ENSMMUP00000008390	ENSMMUP00000012503	ENSMMUG00000006360	ENSMMUG00000009565
macaca	ENSF00000000001	ENSMMUP00000008435	ENSMMUP00000021156	ENSMMUG00000006396	ENSMMUG00000016082
macaca	ENSF00000008908	ENSMMUP00000008753	ENSMMUP00000034639	ENSMMUG00000006656	ENSMMUG00000030062
macaca	ENSF00000009940	ENSMMUP00000008784	ENSMMUP00000018858	ENSMMUG00000006680	ENSMMUG00000014356
macaca	ENSF00000004136	ENSMMUP00000008810	ENSMMUP00000040969	ENSMMUG00000006695	ENSMMUG00000017660
macaca	ENSF00000001355	ENSMMUP00000008895	ENSMMUP00000002708	ENSMMUG00000006760	ENSMMUG00000002024
macaca	ENSF00000000001	ENSMMUP00000008968	ENSMMUP00000039284	ENSMMUG00000028819	ENSMMUG00000031789
macaca	ENSF00000000380	ENSMMUP00000009000	ENSMMUP00000009849	ENSMMUG00000006846	ENSMMUG00000007501
macaca	ENSF00000005683	ENSMMUP00000009109	ENSMMUP00000040875	ENSMMUG00000006937	ENSMMUG00000032370
macaca	ENSF00000001989	ENSMMUP00000009133	ENSMMUP00000015162	ENSMMUG00000006958	ENSMMUG00000011553
macaca	ENSF00000000418	ENSMMUP00000009425	ENSMMUP00000015191	ENSMMUG00000007193	ENSMMUG00000011562
macaca	ENSF00000001368	ENSMMUP00000009706	ENSMMUP00000019221	ENSMMUG00000007396	ENSMMUG00000014646
macaca	ENSF00000002136	ENSMMUP00000010138	ENSMMUP00000021258	ENSMMUG00000007722	ENSMMUG00000016176
macaca	ENSF00000004284	ENSMMUP00000010278	ENSMMUP00000010754	ENSMMUG00000007825	ENSMMUG00000008206
macaca	ENSF00000002627	ENSMMUP00000010368	ENSMMUP00000034216	ENSMMUG00000007897	ENSMMUG00000017684
macaca	ENSF00000006055	ENSMMUP00000010378	ENSMMUP00000016157	ENSMMUG00000007906	ENSMMUG00000012316
macaca	ENSF00000000593	ENSMMUP00000010390	ENSMMUP00000006933	ENSMMUG00000007915	ENSMMUG00000005238
macaca	ENSF00000002263	ENSMMUP00000010861	ENSMMUP00000013909	ENSMMUG00000008286	ENSMMUG00000029458
macaca	ENSF00000001931	ENSMMUP00000010895	ENSMMUP00000025014	ENSMMUG00000008311	ENSMMUG00000019024
macaca	ENSF00000000699	ENSMMUP00000011189	ENSMMUP00000033350	ENSMMUG00000008534	ENSMMUG00000029538
macaca	ENSF00000006375	ENSMMUP00000011580	ENSMMUP00000000169	ENSMMUG00000008835	ENSMMUG00000000126
macaca	ENSF00000002051	ENSMMUP00000011860	ENSMMUP00000021473	ENSMMUG00000009048	ENSMMUG00000016353
macaca	ENSF00000001185	ENSMMUP00000011922	ENSMMUP00000016902	ENSMMUG00000009087	ENSMMUG00000012870
macaca	ENSF00000001365	ENSMMUP00000011972	ENSMMUP00000000964	ENSMMUG00000009127	ENSMMUG00000000710
macaca	ENSF00000002425	ENSMMUP00000012710	ENSMMUP00000030359	ENSMMUG00000009715	ENSMMUG00000023059
macaca	ENSF00000004530	ENSMMUP00000012731	ENSMMUP00000036662	ENSMMUG00000009730	ENSMMUG00000030892
macaca	ENSF00000006547	ENSMMUP00000012916	ENSMMUP00000000788	ENSMMUG00000009863	ENSMMUG00000000585
macaca	ENSF00000001603	ENSMMUP00000013002	ENSMMUP00000036742	ENSMMUG00000009940	ENSMMUG00000030932
macaca	ENSF00000001444	ENSMMUP00000013110	ENSMMUP00000038007	ENSMMUG00000010029	ENSMMUG00000019335
macaca	ENSF00000005713	ENSMMUP00000013626	ENSMMUP00000007411	ENSMMUG00000010395	ENSMMUG00000005605
macaca	ENSF00000001229	ENSMMUP00000013745	ENSMMUP00000034926	ENSMMUG00000010489	ENSMMUG00000020941
macaca	ENSF00000000999	ENSMMUP00000013823	ENSMMUP00000030224	ENSMMUG00000010545	ENSMMUG00000022945
macaca	ENSF00000002516	ENSMMUP00000013928	ENSMMUP00000016025	ENSMMUG00000010627	ENSMMUG00000012219
macaca	ENSF00000007782	ENSMMUP00000013968	ENSMMUP00000041014	ENSMMUG00000010661	ENSMMUG00000032435
macaca	ENSF00000005812	ENSMMUP00000014000	ENSMMUP00000031081	ENSMMUG00000010685	ENSMMUG00000023608
macaca	ENSF00000000001	ENSMMUP00000014071	ENSMMUP00000011762	ENSMMUG00000010741	ENSMMUG00000008978
macaca	ENSF00000000202	ENSMMUP00000014304	ENSMMUP00000031038	ENSMMUG00000010903	ENSMMUG00000023580
macaca	ENSF00000000801	ENSMMUP00000014565	ENSMMUP00000035466	ENSMMUG00000011126	ENSMMUG00000008586
macaca	ENSF00000006771	ENSMMUP00000015228	ENSMMUP00000001343	ENSMMUG00000011596	ENSMMUG00000001000
macaca	ENSF00000000238	ENSMMUP00000015331	ENSMMUP00000023185	ENSMMUG00000011681	ENSMMUG00000017619
macaca	ENSF00000002781	ENSMMUP00000015513	ENSMMUP00000007672	ENSMMUG00000011825	ENSMMUG00000005822
macaca	ENSF00000003138	ENSMMUP00000015619	ENSMMUP00000011446	ENSMMUG00000011901	ENSMMUG00000031981
macaca	ENSF00000008112	ENSMMUP00000015683	ENSMMUP00000002503	ENSMMUG00000011961	ENSMMUG00000001881
macaca	ENSF00000004073	ENSMMUP00000015792	ENSMMUP00000010216	ENSMMUG00000012038	ENSMMUG00000007774
macaca	ENSF00000000390	ENSMMUP00000015830	ENSMMUP00000007503	ENSMMUG00000012065	ENSMMUG00000005680
macaca	ENSF00000002049	ENSMMUP00000015917	ENSMMUP00000022625	ENSMMUG00000012137	ENSMMUG00000017199
macaca	ENSF00000004559	ENSMMUP00000015967	ENSMMUP00000028827	ENSMMUG00000012172	ENSMMUG00000021893
macaca	ENSF00000001495	ENSMMUP00000016046	ENSMMUP00000010777	ENSMMUG00000008223	ENSMMUG00000031720
macaca	ENSF00000000336	ENSMMUP00000016108	ENSMMUP00000015466	ENSMMUG00000012280	ENSMMUG00000011777
macaca	ENSF00000004477	ENSMMUP00000016262	ENSMMUP00000009477	ENSMMUG00000012382	ENSMMUG00000007226
macaca	ENSF00000004388	ENSMMUP00000016268	ENSMMUP00000029970	ENSMMUG00000012390	ENSMMUG00000022763
macaca	ENSF00000002368	ENSMMUP00000016298	ENSMMUP00000016337	ENSMMUG00000012415	ENSMMUG00000012444
macaca	ENSF00000000265	ENSMMUP00000016391	ENSMMUP00000034982	ENSMMUG00000012484	ENSMMUG00000030225
macaca	ENSF00000008961	ENSMMUP00000016455	ENSMMUP00000004988	ENSMMUG00000012536	ENSMMUG00000003741
macaca	ENSF00000008788	ENSMMUP00000016561	ENSMMUP00000013133	ENSMMUG00000012612	ENSMMUG00000010044
macaca	ENSF00000002605	ENSMMUP00000016641	ENSMMUP00000014368	ENSMMUG00000012671	ENSMMUG00000010956
macaca	ENSF00000002326	ENSMMUP00000017078	ENSMMUP00000014214	ENSMMUG00000013008	ENSMMUG00000010845
macaca	ENSF00000002327	ENSMMUP00000017430	ENSMMUP00000035243	ENSMMUG00000013255	ENSMMUG00000030326
macaca	ENSF00000000238	ENSMMUP00000017587	ENSMMUP00000020225	ENSMMUG00000013387	ENSMMUG00000015419
macaca	ENSF00000001410	ENSMMUP00000017698	ENSMMUP00000014792	ENSMMUG00000003412	ENSMMUG00000011287
macaca	ENSF00000000622	ENSMMUP00000017718	ENSMMUP00000024964	ENSMMUG00000013477	ENSMMUG00000018977
macaca	ENSF00000002009	ENSMMUP00000017972	ENSMMUP00000004516	ENSMMUG00000013667	ENSMMUG00000003388
macaca	ENSF00000000001	ENSMMUP00000018285	ENSMMUP00000000737	ENSMMUG00000013914	ENSMMUG00000000547
macaca	ENSF00000000732	ENSMMUP00000018568	ENSMMUP00000026815	ENSMMUG00000014132	ENSMMUG00000020379
macaca	ENSF00000007114	ENSMMUP00000018584	ENSMMUP00000036199	ENSMMUG00000014142	ENSMMUG00000015787
macaca	ENSF00000002495	ENSMMUP00000018619	ENSMMUP00000002227	ENSMMUG00000014175	ENSMMUG00000001662
macaca	ENSF00000004672	ENSMMUP00000018628	ENSMMUP00000014924	ENSMMUG00000014183	ENSMMUG00000011373
macaca	ENSF00000000354	ENSMMUP00000018706	ENSMMUP00000003732	ENSMMUG00000014245	ENSMMUG00000002783
macaca	ENSF00000002153	ENSMMUP00000018926	ENSMMUP00000015774	ENSMMUG00000014407	ENSMMUG00000012026
macaca	ENSF00000003234	ENSMMUP00000018978	ENSMMUP00000012238	ENSMMUG00000014454	ENSMMUG00000009344
macaca	ENSF00000000485	ENSMMUP00000019180	ENSMMUP00000016981	ENSMMUG00000014614	ENSMMUG00000012934
macaca	ENSF00000006546	ENSMMUP00000019236	ENSMMUP00000002903	ENSMMUG00000014661	ENSMMUG00000002180
macaca	ENSF00000001161	ENSMMUP00000019243	ENSMMUP00000029212	ENSMMUG00000014666	ENSMMUG00000022192
macaca	ENSF00000002119	ENSMMUP00000019354	ENSMMUP00000025582	ENSMMUG00000014745	ENSMMUG00000019469
macaca	ENSF00000000082	ENSMMUP00000019396	ENSMMUP00000037227	ENSMMUG00000031719	ENSMMUG00000031083
macaca	ENSF00000002499	ENSMMUP00000019571	ENSMMUP00000017116	ENSMMUG00000014916	ENSMMUG00000013035
macaca	ENSF00000001874	ENSMMUP00000019598	ENSMMUP00000018123	ENSMMUG00000014941	ENSMMUG00000013784
macaca	ENSF00000003131	ENSMMUP00000019688	ENSMMUP00000005727	ENSMMUG00000015020	ENSMMUG00000004279
macaca	ENSF00000000001	ENSMMUP00000019762	ENSMMUP00000027001	ENSMMUG00000015082	ENSMMUG00000020504
macaca	ENSF00000002760	ENSMMUP00000020541	ENSMMUP00000006532	ENSMMUG00000015657	ENSMMUG00000004924
macaca	ENSF00000001366	ENSMMUP00000020564	ENSMMUP00000029193	ENSMMUG00000015668	ENSMMUG00000022176
macaca	ENSF00000004809	ENSMMUP00000020586	ENSMMUP00000015554	ENSMMUG00000015686	ENSMMUG00000011854
macaca	ENSF00000000302	ENSMMUP00000020597	ENSMMUP00000004152	ENSMMUG00000015688	ENSMMUG00000003112
macaca	ENSF00000000913	ENSMMUP00000020614	ENSMMUP00000038512	ENSMMUG00000029827	ENSMMUG00000031516
macaca	ENSF00000003654	ENSMMUP00000020903	ENSMMUP00000007949	ENSMMUG00000015901	ENSMMUG00000006054
macaca	ENSF00000002059	ENSMMUP00000020911	ENSMMUP00000019508	ENSMMUG00000015907	ENSMMUG00000014862
macaca	ENSF00000000044	ENSMMUP00000020969	ENSMMUP00000038053	ENSMMUG00000015934	ENSMMUG00000031349
macaca	ENSF00000000130	ENSMMUP00000021130	ENSMMUP00000021640	ENSMMUG00000016059	ENSMMUG00000016467
macaca	ENSF00000000329	ENSMMUP00000021162	ENSMMUP00000041329	ENSMMUG00000016085	ENSMMUG00000023179
macaca	ENSF00000000836	ENSMMUP00000021221	ENSMMUP00000021313	ENSMMUG00000016134	ENSMMUG00000016217
macaca	ENSF00000008254	ENSMMUP00000021327	ENSMMUP00000015023	ENSMMUG00000016229	ENSMMUG00000011452
macaca	ENSF00000002974	ENSMMUP00000021388	ENSMMUP00000002354	ENSMMUG00000016278	ENSMMUG00000001767
macaca	ENSF00000002256	ENSMMUP00000021470	ENSMMUP00000019696	ENSMMUG00000016350	ENSMMUG00000015027
macaca	ENSF00000003847	ENSMMUP00000021488	ENSMMUP00000036241	ENSMMUG00000016362	ENSMMUG00000030710
macaca	ENSF00000000202	ENSMMUP00000022070	ENSMMUP00000038605	ENSMMUG00000016789	ENSMMUG00000009929
macaca	ENSF00000006499	ENSMMUP00000022103	ENSMMUP00000021025	ENSMMUG00000016813	ENSMMUG00000015986
macaca	ENSF00000004328	ENSMMUP00000022440	ENSMMUP00000035630	ENSMMUG00000017058	ENSMMUG00000030471
macaca	ENSF00000001097	ENSMMUP00000022676	ENSMMUP00000013260	ENSMMUG00000017241	ENSMMUG00000010140
macaca	ENSF00000000629	ENSMMUP00000022746	ENSMMUP00000018686	ENSMMUG00000017292	ENSMMUG00000014227
macaca	ENSF00000001821	ENSMMUP00000022813	ENSMMUP00000028136	ENSMMUG00000017336	ENSMMUG00000021359
macaca	ENSF00000001117	ENSMMUP00000022868	ENSMMUP00000009367	ENSMMUG00000017375	ENSMMUG00000007151
macaca	ENSF00000004033	ENSMMUP00000022980	ENSMMUP00000020620	ENSMMUG00000017458	ENSMMUG00000015706
macaca	ENSF00000001399	ENSMMUP00000022987	ENSMMUP00000030737	ENSMMUG00000023352	ENSMMUG00000017463
macaca	ENSF00000000134	ENSMMUP00000022990	ENSMMUP00000035311	ENSMMUG00000017466	ENSMMUG00000005928
macaca	ENSF00000000018	ENSMMUP00000023266	ENSMMUP00000001807	ENSMMUG00000017683	ENSMMUG00000001353
macaca	ENSF00000000556	ENSMMUP00000023379	ENSMMUP00000026785	ENSMMUG00000017778	ENSMMUG00000020356
macaca	ENSF00000003826	ENSMMUP00000024093	ENSMMUP00000006697	ENSMMUG00000018325	ENSMMUG00000005054
macaca	ENSF00000000113	ENSMMUP00000024494	ENSMMUP00000040860	ENSMMUG00000018617	ENSMMUG00000019688
macaca	ENSF00000001206	ENSMMUP00000024679	ENSMMUP00000015734	ENSMMUG00000018750	ENSMMUG00000011998
macaca	ENSF00000001639	ENSMMUP00000024694	ENSMMUP00000023643	ENSMMUG00000018766	ENSMMUG00000017990
macaca	ENSF00000000146	ENSMMUP00000024808	ENSMMUP00000024416	ENSMMUG00000018853	ENSMMUG00000018563
macaca	ENSF00000001785	ENSMMUP00000025002	ENSMMUP00000035086	ENSMMUG00000019016	ENSMMUG00000005866
macaca	ENSF00000002157	ENSMMUP00000025099	ENSMMUP00000007501	ENSMMUG00000019094	ENSMMUG00000005679
macaca	ENSF00000005838	ENSMMUP00000025131	ENSMMUP00000034795	ENSMMUG00000019114	ENSMMUG00000030154
macaca	ENSF00000002444	ENSMMUP00000025189	ENSMMUP00000037491	ENSMMUG00000019167	ENSMMUG00000019467
macaca	ENSF00000002246	ENSMMUP00000025238	ENSMMUP00000001675	ENSMMUG00000019203	ENSMMUG00000001255
macaca	ENSF00000000097	ENSMMUP00000025446	ENSMMUP00000017155	ENSMMUG00000019368	ENSMMUG00000013057
macaca	ENSF00000002738	ENSMMUP00000025450	ENSMMUP00000011237	ENSMMUG00000019370	ENSMMUG00000008567
macaca	ENSF00000000413	ENSMMUP00000025458	ENSMMUP00000040927	ENSMMUG00000019378	ENSMMUG00000032397
macaca	ENSF00000003861	ENSMMUP00000025711	ENSMMUP00000011560	ENSMMUG00000019572	ENSMMUG00000008820
macaca	ENSF00000001033	ENSMMUP00000025921	ENSMMUP00000037757	ENSMMUG00000019719	ENSMMUG00000031259
macaca	ENSF00000008180	ENSMMUP00000026034	ENSMMUP00000000505	ENSMMUG00000019802	ENSMMUG00000000379
macaca	ENSF00000001318	ENSMMUP00000026136	ENSMMUP00000021644	ENSMMUG00000019882	ENSMMUG00000016472
macaca	ENSF00000004138	ENSMMUP00000026170	ENSMMUP00000007080	ENSMMUG00000019912	ENSMMUG00000005354
macaca	ENSF00000002562	ENSMMUP00000026293	ENSMMUP00000014752	ENSMMUG00000019996	ENSMMUG00000011258
macaca	ENSF00000001231	ENSMMUP00000026333	ENSMMUP00000013841	ENSMMUG00000020027	ENSMMUG00000010554
macaca	ENSF00000001097	ENSMMUP00000026595	ENSMMUP00000040975	ENSMMUG00000020200	ENSMMUG00000004793
macaca	ENSF00000005353	ENSMMUP00000026612	ENSMMUP00000035947	ENSMMUG00000020214	ENSMMUG00000030594
macaca	ENSF00000002690	ENSMMUP00000026660	ENSMMUP00000025857	ENSMMUG00000020252	ENSMMUG00000019680
macaca	ENSF00000001610	ENSMMUP00000027212	ENSMMUP00000030836	ENSMMUG00000020680	ENSMMUG00000023420
macaca	ENSF00000001711	ENSMMUP00000027293	ENSMMUP00000009663	ENSMMUG00000020740	ENSMMUG00000007366
macaca	ENSF00000000134	ENSMMUP00000027295	ENSMMUP00000015909	ENSMMUG00000020743	ENSMMUG00000012130
macaca	ENSF00000005550	ENSMMUP00000027313	ENSMMUP00000012270	ENSMMUG00000020751	ENSMMUG00000009370
macaca	ENSF00000000095	ENSMMUP00000027412	ENSMMUP00000018018	ENSMMUG00000020827	ENSMMUG00000013700
macaca	ENSF00000004188	ENSMMUP00000027490	ENSMMUP00000034952	ENSMMUG00000020894	ENSMMUG00000030210
macaca	ENSF00000000140	ENSMMUP00000027666	ENSMMUP00000004621	ENSMMUG00000021023	ENSMMUG00000003469
macaca	ENSF00000000134	ENSMMUP00000027667	ENSMMUP00000022969	ENSMMUG00000021025	ENSMMUG00000017446
macaca	ENSF00000002647	ENSMMUP00000028078	ENSMMUP00000013097	ENSMMUG00000021314	ENSMMUG00000030251
macaca	ENSF00000011111	ENSMMUP00000028133	ENSMMUP00000040051	ENSMMUG00000021357	ENSMMUG00000032061
macaca	ENSF00000003635	ENSMMUP00000028423	ENSMMUP00000028895	ENSMMUG00000021581	ENSMMUG00000021944
macaca	ENSF00000001370	ENSMMUP00000028744	ENSMMUP00000012200	ENSMMUG00000021828	ENSMMUG00000030448
macaca	ENSF00000000018	ENSMMUP00000029086	ENSMMUP00000025430	ENSMMUG00000022086	ENSMMUG00000019354
macaca	ENSF00000004159	ENSMMUP00000029092	ENSMMUP00000001808	ENSMMUG00000022095	ENSMMUG00000001354
macaca	ENSF00000001913	ENSMMUP00000029169	ENSMMUP00000038039	ENSMMUG00000022158	ENSMMUG00000031343
macaca	ENSF00000001919	ENSMMUP00000029198	ENSMMUP00000030840	ENSMMUG00000022182	ENSMMUG00000023424
macaca	ENSF00000001689	ENSMMUP00000029345	ENSMMUP00000016500	ENSMMUG00000022291	ENSMMUG00000012570
macaca	ENSF00000002380	ENSMMUP00000029462	ENSMMUP00000025021	ENSMMUG00000022390	ENSMMUG00000019031
macaca	ENSF00000001874	ENSMMUP00000029501	ENSMMUP00000010035	ENSMMUG00000022413	ENSMMUG00000007639
macaca	ENSF00000001989	ENSMMUP00000029541	ENSMMUP00000029160	ENSMMUG00000022452	ENSMMUG00000022150
macaca	ENSF00000000402	ENSMMUP00000029729	ENSMMUP00000028894	ENSMMUG00000022585	ENSMMUG00000021943
macaca	ENSF00000004868	ENSMMUP00000029781	ENSMMUP00000018755	ENSMMUG00000022619	ENSMMUG00000028707
macaca	ENSF00000000001	ENSMMUP00000029802	ENSMMUP00000031908	ENSMMUG00000022634	ENSMMUG00000011388
macaca	ENSF00000006619	ENSMMUP00000029920	ENSMMUP00000041036	ENSMMUG00000022722	ENSMMUG00000007989
macaca	ENSF00000001869	ENSMMUP00000029948	ENSMMUP00000003436	ENSMMUG00000022740	ENSMMUG00000002554
macaca	ENSF00000001453	ENSMMUP00000029949	ENSMMUP00000028924	ENSMMUG00000022741	ENSMMUG00000021967
macaca	ENSF00000000130	ENSMMUP00000029955	ENSMMUP00000020734	ENSMMUG00000022747	ENSMMUG00000015779
macaca	ENSF00000001325	ENSMMUP00000030248	ENSMMUP00000033459	ENSMMUG00000022965	ENSMMUG00000002237
macaca	ENSF00000001864	ENSMMUP00000030260	ENSMMUP00000006173	ENSMMUG00000022979	ENSMMUG00000031336
macaca	ENSF00000000244	ENSMMUP00000030394	ENSMMUP00000013791	ENSMMUG00000023086	ENSMMUG00000010524
macaca	ENSF00000000933	ENSMMUP00000030508	ENSMMUP00000032771	ENSMMUG00000023178	ENSMMUG00000029293
macaca	ENSF00000002490	ENSMMUP00000030713	ENSMMUP00000016151	ENSMMUG00000023335	ENSMMUG00000012312
macaca	ENSF00000003303	ENSMMUP00000030714	ENSMMUP00000041024	ENSMMUG00000023337	ENSMMUG00000032440
macaca	ENSF00000015475	ENSMMUP00000030731	ENSMMUP00000030727	ENSMMUG00000023348	ENSMMUG00000023346
macaca	ENSF00000001049	ENSMMUP00000030762	ENSMMUP00000033495	ENSMMUG00000023368	ENSMMUG00000029598
macaca	ENSF00000000076	ENSMMUP00000031296	ENSMMUP00000039182	ENSMMUG00000023759	ENSMMUG00000031740
macaca	ENSF00000000080	ENSMMUP00000031327	ENSMMUP00000009962	ENSMMUG00000023785	ENSMMUG00000007588
macaca	ENSF00000002936	ENSMMUP00000031389	ENSMMUP00000025343	ENSMMUG00000008729	ENSMMUG00000019288
macaca	ENSF00000002434	ENSMMUP00000031752	ENSMMUP00000033178	ENSMMUG00000028844	ENSMMUG00000006283
macaca	ENSF00000001072	ENSMMUP00000031895	ENSMMUP00000034708	ENSMMUG00000028898	ENSMMUG00000030101
macaca	ENSF00000012634	ENSMMUP00000031944	ENSMMUP00000000799	ENSMMUG00000028920	ENSMMUG00000000594
macaca	ENSF00000002101	ENSMMUP00000031951	ENSMMUP00000015913	ENSMMUG00000014816	ENSMMUG00000002664
macaca	ENSF00000002865	ENSMMUP00000031983	ENSMMUP00000005507	ENSMMUG00000000453	ENSMMUG00000004117
macaca	ENSF00000003219	ENSMMUP00000032055	ENSMMUP00000041002	ENSMMUG00000013396	ENSMMUG00000017757
macaca	ENSF00000000001	ENSMMUP00000032115	ENSMMUP00000010568	ENSMMUG00000028996	ENSMMUG00000008063
macaca	ENSF00000000354	ENSMMUP00000032146	ENSMMUP00000002958	ENSMMUG00000005876	ENSMMUG00000002214
macaca	ENSF00000002030	ENSMMUP00000032204	ENSMMUP00000030240	ENSMMUG00000018060	ENSMMUG00000022958
macaca	ENSF00000001829	ENSMMUP00000032530	ENSMMUP00000019975	ENSMMUG00000029178	ENSMMUG00000015237
macaca	ENSF00000004555	ENSMMUP00000032579	ENSMMUP00000009207	ENSMMUG00000029197	ENSMMUG00000007018
macaca	ENSF00000000011	ENSMMUP00000033154	ENSMMUP00000023482	ENSMMUG00000006465	ENSMMUG00000017859
macaca	ENSF00000003515	ENSMMUP00000033197	ENSMMUP00000032338	ENSMMUG00000029462	ENSMMUG00000029091
macaca	ENSF00000001136	ENSMMUP00000033454	ENSMMUP00000005543	ENSMMUG00000023454	ENSMMUG00000004145
macaca	ENSF00000004565	ENSMMUP00000033538	ENSMMUP00000010318	ENSMMUG00000013715	ENSMMUG00000007857
macaca	ENSF00000000317	ENSMMUP00000033886	ENSMMUP00000006638	ENSMMUG00000001758	ENSMMUG00000005012
macaca	ENSF00000003353	ENSMMUP00000033889	ENSMMUP00000017817	ENSMMUG00000012898	ENSMMUG00000013550
macaca	ENSF00000001073	ENSMMUP00000033895	ENSMMUP00000017176	ENSMMUG00000012893	ENSMMUG00000013077
macaca	ENSF00000000517	ENSMMUP00000033909	ENSMMUP00000012155	ENSMMUG00000029783	ENSMMUG00000009277
macaca	ENSF00000006435	ENSMMUP00000034194	ENSMMUP00000008612	ENSMMUG00000029862	ENSMMUG00000006541
macaca	ENSF00000002780	ENSMMUP00000034400	ENSMMUP00000002276	ENSMMUG00000029971	ENSMMUG00000001703
macaca	ENSF00000006930	ENSMMUP00000034432	ENSMMUP00000006308	ENSMMUG00000011853	ENSMMUG00000004743
macaca	ENSF00000004697	ENSMMUP00000034599	ENSMMUP00000029761	ENSMMUG00000030047	ENSMMUG00000022605
macaca	ENSF00000028776	ENSMMUP00000034917	ENSMMUP00000038732	ENSMMUG00000030198	ENSMMUG00000031587
macaca	ENSF00000000263	ENSMMUP00000035329	ENSMMUP00000021505	ENSMMUG00000030367	ENSMMUG00000016378
macaca	ENSF00000000001	ENSMMUP00000035484	ENSMMUP00000026838	ENSMMUG00000012088	ENSMMUG00000020397
macaca	ENSF00000002088	ENSMMUP00000035987	ENSMMUP00000035493	ENSMMUG00000030614	ENSMMUG00000030412
macaca	ENSF00000004972	ENSMMUP00000036154	ENSMMUP00000013729	ENSMMUG00000017179	ENSMMUG00000010476
macaca	ENSF00000000018	ENSMMUP00000036224	ENSMMUP00000016190	ENSMMUG00000019193	ENSMMUG00000012334
macaca	ENSF00000000827	ENSMMUP00000036457	ENSMMUP00000006342	ENSMMUG00000015208	ENSMMUG00000004772
macaca	ENSF00000000415	ENSMMUP00000036496	ENSMMUP00000030380	ENSMMUG00000001920	ENSMMUG00000023074
macaca	ENSF00000001595	ENSMMUP00000036701	ENSMMUP00000013687	ENSMMUG00000017568	ENSMMUG00000010445
macaca	ENSF00000000238	ENSMMUP00000036843	ENSMMUP00000018312	ENSMMUG00000003138	ENSMMUG00000013934
macaca	ENSF00000000066	ENSMMUP00000036862	ENSMMUP00000040360	ENSMMUG00000030972	ENSMMUG00000032171
macaca	ENSF00000001345	ENSMMUP00000036875	ENSMMUP00000016860	ENSMMUG00000021337	ENSMMUG00000012836
macaca	ENSF00000000066	ENSMMUP00000036891	ENSMMUP00000000603	ENSMMUG00000019426	ENSMMUG00000000450
macaca	ENSF00000000949	ENSMMUP00000036919	ENSMMUP00000017508	ENSMMUG00000011068	ENSMMUG00000013316
macaca	ENSF00000006414	ENSMMUP00000036979	ENSMMUP00000019383	ENSMMUG00000031015	ENSMMUG00000014765
macaca	ENSF00000000082	ENSMMUP00000037211	ENSMMUP00000036928	ENSMMUG00000031070	ENSMMUG00000031003
macaca	ENSF00000000011	ENSMMUP00000037260	ENSMMUP00000007591	ENSMMUG00000031092	ENSMMUG00000005752
macaca	ENSF00000003694	ENSMMUP00000037272	ENSMMUP00000018090	ENSMMUG00000011547	ENSMMUG00000013761
macaca	ENSF00000000192	ENSMMUP00000037559	ENSMMUP00000032249	ENSMMUG00000018891	ENSMMUG00000018893
macaca	ENSF00000006461	ENSMMUP00000037733	ENSMMUP00000035470	ENSMMUG00000003052	ENSMMUG00000030402
macaca	ENSF00000002257	ENSMMUP00000037830	ENSMMUP00000004280	ENSMMUG00000020627	ENSMMUG00000032421
macaca	ENSF00000000389	ENSMMUP00000037898	ENSMMUP00000033547	ENSMMUG00000031297	ENSMMUG00000029619
macaca	ENSF00000000239	ENSMMUP00000037906	ENSMMUP00000023872	ENSMMUG00000009864	ENSMMUG00000018157
macaca	ENSF00000000164	ENSMMUP00000038523	ENSMMUP00000039526	ENSMMUG00000031521	ENSMMUG00000002584
macaca	ENSF00000002306	ENSMMUP00000038598	ENSMMUP00000035610	ENSMMUG00000007433	ENSMMUG00000030465
macaca	ENSF00000000113	ENSMMUP00000038802	ENSMMUP00000038662	ENSMMUG00000031610	ENSMMUG00000031560
macaca	ENSF00000000270	ENSMMUP00000038816	ENSMMUP00000015646	ENSMMUG00000031613	ENSMMUG00000011929
macaca	ENSF00000000558	ENSMMUP00000039421	ENSMMUP00000001102	ENSMMUG00000031838	ENSMMUG00000000810
macaca	ENSF00000000096	ENSMMUP00000039484	ENSMMUP00000008650	ENSMMUG00000031869	ENSMMUG00000006575
macaca	ENSF00000000881	ENSMMUP00000039807	ENSMMUP00000008533	ENSMMUG00000004201	ENSMMUG00000006475
macaca	ENSF00000004675	ENSMMUP00000039895	ENSMMUP00000019146	ENSMMUG00000012458	ENSMMUG00000014582
macaca	ENSF00000000239	ENSMMUP00000040098	ENSMMUP00000023653	ENSMMUG00000032078	ENSMMUG00000018000
macaca	ENSF00000001029	ENSMMUP00000040325	ENSMMUP00000018951	ENSMMUG00000021929	ENSMMUG00000014427
macaca	ENSF00000000655	ENSMMUP00000040736	ENSMMUP00000015538	ENSMMUG00000014781	ENSMMUG00000011842
macaca	ENSF00000006929	ENSMMUP00000040745	ENSMMUP00000030595	ENSMMUG00000009015	ENSMMUG00000023250
macaca	ENSF00000003451	ENSMMUP00000040811	ENSMMUP00000016545	ENSMMUG00000016948	ENSMMUG00000012603
macaca	ENSF00000009092	ENSMMUP00000040840	ENSMMUP00000010580	ENSMMUG00000023574	ENSMMUG00000008076
macaca	ENSF00000003215	ENSMMUP00000040864	ENSMMUP00000003478	ENSMMUG00000000856	ENSMMUG00000002587
macaca	ENSF00000003780	ENSMMUP00000041035	ENSMMUP00000024188	ENSMMUG00000017635	ENSMMUG00000018395
macaca	ENSF00000000096	ENSMMUP00000041091	ENSMMUP00000025047	ENSMMUG00000032464	ENSMMUG00000019052
macaca	ENSF00000001896	ENSMMUP00000041295	ENSMMUP00000022998	ENSMMUG00000004595	ENSMMUG00000017474
macaca	ENSF00000001173	ENSMMUP00000041306	ENSMMUP00000037181	ENSMMUG00000009545	ENSMMUG00000031060
macaca	ENSF00000002336	ENSMMUP00000041359	ENSMMUP00000006521	ENSMMUG00000032591	ENSMMUG00000004911
macaca	ENSF00000000001	ENSMMUP00000041369	ENSMMUP00000024408	ENSMMUG00000017500	ENSMMUG00000018555
opossum	ENSF00000002728	ENSMODP00000000155	ENSMODP00000023097	ENSMODG00000000134	ENSMODG00000018523
opossum	ENSF00000005241	ENSMODP00000000769	ENSMODP00000020944	ENSMODG00000000644	ENSMODG00000016780
opossum	ENSF00000000269	ENSMODP00000000901	ENSMODP00000037758	ENSMODG00000000750	ENSMODG00000025340
opossum	ENSF00000005906	ENSMODP00000000995	ENSMODP00000027681	ENSMODG00000000837	ENSMODG00000022947
opossum	ENSF00000008311	ENSMODP00000001157	ENSMODP00000035166	ENSMODG00000000970	ENSMODG00000024691
opossum	ENSF00000001441	ENSMODP00000001206	ENSMODP00000006150	ENSMODG00000001012	ENSMODG00000004999
opossum	ENSF00000001511	ENSMODP00000001349	ENSMODP00000038168	ENSMODG00000001133	ENSMODG00000025431
opossum	ENSF00000000130	ENSMODP00000001599	ENSMODP00000023629	ENSMODG00000001323	ENSMODG00000018937
opossum	ENSF00000000244	ENSMODP00000001684	ENSMODP00000023364	ENSMODG00000001395	ENSMODG00000018739
opossum	ENSF00000000354	ENSMODP00000001776	ENSMODP00000006999	ENSMODG00000001462	ENSMODG00000005650
opossum	ENSF00000000876	ENSMODP00000001927	ENSMODP00000000207	ENSMODG00000001578	ENSMODG00000000179
opossum	ENSF00000003551	ENSMODP00000001944	ENSMODP00000009227	ENSMODG00000001591	ENSMODG00000007436
opossum	ENSF00000008298	ENSMODP00000001948	ENSMODP00000024801	ENSMODG00000001595	ENSMODG00000019876
opossum	ENSF00000004332	ENSMODP00000002324	ENSMODP00000029368	ENSMODG00000001904	ENSMODG00000023302
opossum	ENSF00000002526	ENSMODP00000002398	ENSMODP00000004473	ENSMODG00000001967	ENSMODG00000003657
opossum	ENSF00000002295	ENSMODP00000002481	ENSMODP00000000759	ENSMODG00000002035	ENSMODG00000000636
opossum	ENSF00000000881	ENSMODP00000002577	ENSMODP00000036477	ENSMODG00000002117	ENSMODG00000024979
opossum	ENSF00000001663	ENSMODP00000002709	ENSMODP00000032392	ENSMODG00000002224	ENSMODG00000023959
opossum	ENSF00000004371	ENSMODP00000002824	ENSMODP00000035827	ENSMODG00000002317	ENSMODG00000024840
opossum	ENSF00000003575	ENSMODP00000002879	ENSMODP00000001376	ENSMODG00000002366	ENSMODG00000001155
opossum	ENSF00000000270	ENSMODP00000002891	ENSMODP00000002993	ENSMODG00000002376	ENSMODG00000002463
opossum	ENSF00000002978	ENSMODP00000002894	ENSMODP00000030331	ENSMODG00000002377	ENSMODG00000023542
opossum	ENSF00000001896	ENSMODP00000002922	ENSMODP00000032762	ENSMODG00000002400	ENSMODG00000024059
opossum	ENSF00000001026	ENSMODP00000002944	ENSMODP00000018135	ENSMODG00000002417	ENSMODG00000014514
opossum	ENSF00000002553	ENSMODP00000003357	ENSMODP00000034856	ENSMODG00000002756	ENSMODG00000024606
opossum	ENSF00000002727	ENSMODP00000003378	ENSMODP00000016390	ENSMODG00000025279	ENSMODG00000013096
opossum	ENSF00000000502	ENSMODP00000003645	ENSMODP00000010741	ENSMODG00000003000	ENSMODG00000008634
opossum	ENSF00000001073	ENSMODP00000003753	ENSMODP00000023354	ENSMODG00000003081	ENSMODG00000018732
opossum	ENSF00000000832	ENSMODP00000003792	ENSMODP00000004965	ENSMODG00000003104	ENSMODG00000004037
opossum	ENSF00000002361	ENSMODP00000003816	ENSMODP00000033135	ENSMODG00000003133	ENSMODG00000024116
opossum	ENSF00000009230	ENSMODP00000003847	ENSMODP00000029259	ENSMODG00000003157	ENSMODG00000023280
opossum	ENSF00000000279	ENSMODP00000003925	ENSMODP00000036797	ENSMODG00000003226	ENSMODG00000003590
opossum	ENSF00000001060	ENSMODP00000004206	ENSMODP00000022961	ENSMODG00000003438	ENSMODG00000018413
opossum	ENSF00000001746	ENSMODP00000004249	ENSMODP00000036814	ENSMODG00000003472	ENSMODG00000025083
opossum	ENSF00000004138	ENSMODP00000004298	ENSMODP00000036498	ENSMODG00000003515	ENSMODG00000024986
opossum	ENSF00000000907	ENSMODP00000004515	ENSMODP00000035121	ENSMODG00000003686	ENSMODG00000024678
opossum	ENSF00000000716	ENSMODP00000004731	ENSMODP00000004727	ENSMODG00000003863	ENSMODG00000025227
opossum	ENSF00000008257	ENSMODP00000004765	ENSMODP00000037829	ENSMODG00000003890	ENSMODG00000025356
opossum	ENSF00000000682	ENSMODP00000004776	ENSMODP00000021132	ENSMODG00000003899	ENSMODG00000016941
opossum	ENSF00000014785	ENSMODP00000004797	ENSMODP00000033519	ENSMODG00000003917	ENSMODG00000024183
opossum	ENSF00000001206	ENSMODP00000004988	ENSMODP00000029378	ENSMODG00000004055	ENSMODG00000023304
opossum	ENSF00000001231	ENSMODP00000005228	ENSMODP00000015821	ENSMODG00000004242	ENSMODG00000012648
opossum	ENSF00000003613	ENSMODP00000005264	ENSMODP00000037363	ENSMODG00000004273	ENSMODG00000025206
opossum	ENSF00000005559	ENSMODP00000005268	ENSMODP00000034272	ENSMODG00000004277	ENSMODG00000024474
opossum	ENSF00000001738	ENSMODP00000005369	ENSMODP00000005070	ENSMODG00000004363	ENSMODG00000004120
opossum	ENSF00000000076	ENSMODP00000005562	ENSMODP00000004091	ENSMODG00000004506	ENSMODG00000022797
opossum	ENSF00000005130	ENSMODP00000005663	ENSMODP00000034527	ENSMODG00000004596	ENSMODG00000024541
opossum	ENSF00000002049	ENSMODP00000005812	ENSMODP00000038011	ENSMODG00000004718	ENSMODG00000025399
opossum	ENSF00000006824	ENSMODP00000005906	ENSMODP00000005904	ENSMODG00000004795	ENSMODG00000024007
opossum	ENSF00000008143	ENSMODP00000005981	ENSMODP00000014729	ENSMODG00000004858	ENSMODG00000011762
opossum	ENSF00000001368	ENSMODP00000005986	ENSMODP00000035890	ENSMODG00000004863	ENSMODG00000018011
opossum	ENSF00000001610	ENSMODP00000006033	ENSMODP00000035452	ENSMODG00000004897	ENSMODG00000024750
opossum	ENSF00000007047	ENSMODP00000006397	ENSMODP00000032801	ENSMODG00000005195	ENSMODG00000010447
opossum	ENSF00000000638	ENSMODP00000006416	ENSMODP00000034568	ENSMODG00000005208	ENSMODG00000024554
opossum	ENSF00000003303	ENSMODP00000006533	ENSMODP00000031065	ENSMODG00000005299	ENSMODG00000023666
opossum	ENSF00000007834	ENSMODP00000006566	ENSMODP00000006570	ENSMODG00000005327	ENSMODG00000025190
opossum	ENSF00000005780	ENSMODP00000006583	ENSMODP00000037567	ENSMODG00000005339	ENSMODG00000025275
opossum	ENSF00000000332	ENSMODP00000006805	ENSMODP00000022761	ENSMODG00000005500	ENSMODG00000018250
opossum	ENSF00000003884	ENSMODP00000006888	ENSMODP00000013099	ENSMODG00000005569	ENSMODG00000010451
opossum	ENSF00000002481	ENSMODP00000007111	ENSMODP00000028564	ENSMODG00000005737	ENSMODG00000006101
opossum	ENSF00000000251	ENSMODP00000007124	ENSMODP00000033334	ENSMODG00000005749	ENSMODG00000024147
opossum	ENSF00000002560	ENSMODP00000007321	ENSMODP00000013297	ENSMODG00000005918	ENSMODG00000010616
opossum	ENSF00000000336	ENSMODP00000007325	ENSMODP00000034947	ENSMODG00000005923	ENSMODG00000024637
opossum	ENSF00000000134	ENSMODP00000007336	ENSMODP00000037958	ENSMODG00000005932	ENSMODG00000025382
opossum	ENSF00000005263	ENSMODP00000007351	ENSMODP00000003091	ENSMODG00000005946	ENSMODG00000002543
opossum	ENSF00000003928	ENSMODP00000007444	ENSMODP00000002050	ENSMODG00000006014	ENSMODG00000001676
opossum	ENSF00000000095	ENSMODP00000007836	ENSMODP00000003823	ENSMODG00000006317	ENSMODG00000003139
opossum	ENSF00000000380	ENSMODP00000008036	ENSMODP00000032002	ENSMODG00000006475	ENSMODG00000007680
opossum	ENSF00000003215	ENSMODP00000008205	ENSMODP00000017620	ENSMODG00000006616	ENSMODG00000014093
opossum	ENSF00000000954	ENSMODP00000008578	ENSMODP00000023990	ENSMODG00000006919	ENSMODG00000019213
opossum	ENSF00000004942	ENSMODP00000008641	ENSMODP00000035569	ENSMODG00000006971	ENSMODG00000024776
opossum	ENSF00000005545	ENSMODP00000008719	ENSMODP00000029875	ENSMODG00000007031	ENSMODG00000018403
opossum	ENSF00000008096	ENSMODP00000008724	ENSMODP00000015706	ENSMODG00000007037	ENSMODG00000025054
opossum	ENSF00000004268	ENSMODP00000009079	ENSMODP00000034050	ENSMODG00000007319	ENSMODG00000024425
opossum	ENSF00000002886	ENSMODP00000009178	ENSMODP00000008404	ENSMODG00000007399	ENSMODG00000006788
opossum	ENSF00000003219	ENSMODP00000009368	ENSMODP00000026339	ENSMODG00000007551	ENSMODG00000021063
opossum	ENSF00000000599	ENSMODP00000009488	ENSMODP00000028777	ENSMODG00000007642	ENSMODG00000005722
opossum	ENSF00000001157	ENSMODP00000009556	ENSMODP00000009552	ENSMODG00000007691	ENSMODG00000023910
opossum	ENSF00000001008	ENSMODP00000009834	ENSMODP00000024079	ENSMODG00000007901	ENSMODG00000019293
opossum	ENSF00000000110	ENSMODP00000009911	ENSMODP00000025957	ENSMODG00000007751	ENSMODG00000024898
opossum	ENSF00000001668	ENSMODP00000010067	ENSMODP00000037863	ENSMODG00000008095	ENSMODG00000025362
opossum	ENSF00000002562	ENSMODP00000010174	ENSMODP00000035157	ENSMODG00000008183	ENSMODG00000024689
opossum	ENSF00000000076	ENSMODP00000010252	ENSMODP00000036304	ENSMODG00000008253	ENSMODG00000024936
opossum	ENSF00000002801	ENSMODP00000010317	ENSMODP00000035687	ENSMODG00000008300	ENSMODG00000024803
opossum	ENSF00000006055	ENSMODP00000010376	ENSMODP00000032915	ENSMODG00000008346	ENSMODG00000024084
opossum	ENSF00000000532	ENSMODP00000010503	ENSMODP00000015591	ENSMODG00000008446	ENSMODG00000012454
opossum	ENSF00000001774	ENSMODP00000010785	ENSMODP00000010787	ENSMODG00000008669	ENSMODG00000023693
opossum	ENSF00000000253	ENSMODP00000011159	ENSMODP00000035731	ENSMODG00000008950	ENSMODG00000024812
opossum	ENSF00000005838	ENSMODP00000011164	ENSMODP00000038170	ENSMODG00000008954	ENSMODG00000025432
opossum	ENSF00000006946	ENSMODP00000011175	ENSMODP00000035903	ENSMODG00000008964	ENSMODG00000024851
opossum	ENSF00000006929	ENSMODP00000011222	ENSMODP00000002095	ENSMODG00000008997	ENSMODG00000001710
opossum	ENSF00000005060	ENSMODP00000011447	ENSMODP00000005067	ENSMODG00000009173	ENSMODG00000004117
opossum	ENSF00000003694	ENSMODP00000011589	ENSMODP00000013223	ENSMODG00000009275	ENSMODG00000010553
opossum	ENSF00000001931	ENSMODP00000011769	ENSMODP00000032626	ENSMODG00000009419	ENSMODG00000001058
opossum	ENSF00000000140	ENSMODP00000011806	ENSMODP00000028170	ENSMODG00000009451	ENSMODG00000023075
opossum	ENSF00000002939	ENSMODP00000012178	ENSMODP00000037360	ENSMODG00000009745	ENSMODG00000025205
opossum	ENSF00000000451	ENSMODP00000012367	ENSMODP00000012396	ENSMODG00000009874	ENSMODG00000009906
opossum	ENSF00000000317	ENSMODP00000012444	ENSMODP00000024034	ENSMODG00000009937	ENSMODG00000019254
opossum	ENSF00000005637	ENSMODP00000012566	ENSMODP00000027046	ENSMODG00000010034	ENSMODG00000022672
opossum	ENSF00000005691	ENSMODP00000012603	ENSMODP00000002950	ENSMODG00000010063	ENSMODG00000002426
opossum	ENSF00000005463	ENSMODP00000012636	ENSMODP00000027318	ENSMODG00000010090	ENSMODG00000022798
opossum	ENSF00000000801	ENSMODP00000012648	ENSMODP00000028722	ENSMODG00000010098	ENSMODG00000023171
opossum	ENSF00000009745	ENSMODP00000012838	ENSMODP00000012836	ENSMODG00000010245	ENSMODG00000024566
opossum	ENSF00000001124	ENSMODP00000012925	ENSMODP00000034934	ENSMODG00000010309	ENSMODG00000024629
opossum	ENSF00000001392	ENSMODP00000012927	ENSMODP00000037784	ENSMODG00000010312	ENSMODG00000014405
opossum	ENSF00000005747	ENSMODP00000012967	ENSMODP00000034150	ENSMODG00000010350	ENSMODG00000024442
opossum	ENSF00000005099	ENSMODP00000012972	ENSMODP00000037142	ENSMODG00000010354	ENSMODG00000025135
opossum	ENSF00000002215	ENSMODP00000013035	ENSMODP00000036795	ENSMODG00000010398	ENSMODG00000025078
opossum	ENSF00000003849	ENSMODP00000013207	ENSMODP00000036547	ENSMODG00000010534	ENSMODG00000025004
opossum	ENSF00000009569	ENSMODP00000013264	ENSMODP00000034871	ENSMODG00000010588	ENSMODG00000024615
opossum	ENSF00000000699	ENSMODP00000013319	ENSMODP00000036209	ENSMODG00000010634	ENSMODG00000024915
opossum	ENSF00000001056	ENSMODP00000014090	ENSMODP00000020003	ENSMODG00000011257	ENSMODG00000016028
opossum	ENSF00000001338	ENSMODP00000014502	ENSMODP00000036424	ENSMODG00000011590	ENSMODG00000024973
opossum	ENSF00000001258	ENSMODP00000014538	ENSMODP00000037296	ENSMODG00000011614	ENSMODG00000025182
opossum	ENSF00000004331	ENSMODP00000014558	ENSMODP00000037579	ENSMODG00000011628	ENSMODG00000025281
opossum	ENSF00000003861	ENSMODP00000014608	ENSMODP00000029891	ENSMODG00000011661	ENSMODG00000023445
opossum	ENSF00000003617	ENSMODP00000014642	ENSMODP00000008915	ENSMODG00000011693	ENSMODG00000007190
opossum	ENSF00000003635	ENSMODP00000014643	ENSMODP00000029543	ENSMODG00000011691	ENSMODG00000005764
opossum	ENSF00000001348	ENSMODP00000014713	ENSMODP00000035511	ENSMODG00000011750	ENSMODG00000024765
opossum	ENSF00000009284	ENSMODP00000014780	ENSMODP00000026739	ENSMODG00000011798	ENSMODG00000021403
opossum	ENSF00000000095	ENSMODP00000014918	ENSMODP00000029341	ENSMODG00000023600	ENSMODG00000023292
opossum	ENSF00000003191	ENSMODP00000014985	ENSMODP00000035341	ENSMODG00000022840	ENSMODG00000011957
opossum	ENSF00000003730	ENSMODP00000014996	ENSMODP00000035614	ENSMODG00000011967	ENSMODG00000024783
opossum	ENSF00000002507	ENSMODP00000015192	ENSMODP00000015190	ENSMODG00000012129	ENSMODG00000023105
opossum	ENSF00000000097	ENSMODP00000015261	ENSMODP00000037350	ENSMODG00000012189	ENSMODG00000025196
opossum	ENSF00000005693	ENSMODP00000015295	ENSMODP00000035628	ENSMODG00000012217	ENSMODG00000024787
opossum	ENSF00000004973	ENSMODP00000015533	ENSMODP00000027774	ENSMODG00000012404	ENSMODG00000022953
opossum	ENSF00000000082	ENSMODP00000015609	ENSMODP00000027101	ENSMODG00000023411	ENSMODG00000022699
opossum	ENSF00000001295	ENSMODP00000015650	ENSMODP00000007450	ENSMODG00000012503	ENSMODG00000006021
opossum	ENSF00000000164	ENSMODP00000016019	ENSMODP00000034969	ENSMODG00000012804	ENSMODG00000024647
opossum	ENSF00000000034	ENSMODP00000016211	ENSMODP00000016048	ENSMODG00000012958	ENSMODG00000012827
opossum	ENSF00000000396	ENSMODP00000016240	ENSMODP00000036133	ENSMODG00000012981	ENSMODG00000024902
opossum	ENSF00000004116	ENSMODP00000016322	ENSMODP00000035974	ENSMODG00000013042	ENSMODG00000024868
opossum	ENSF00000000263	ENSMODP00000016434	ENSMODP00000038099	ENSMODG00000013131	ENSMODG00000025415
opossum	ENSF00000003569	ENSMODP00000016457	ENSMODP00000035759	ENSMODG00000013151	ENSMODG00000024817
opossum	ENSF00000002465	ENSMODP00000016830	ENSMODP00000011861	ENSMODG00000013459	ENSMODG00000009494
opossum	ENSF00000006159	ENSMODP00000016869	ENSMODP00000002829	ENSMODG00000013486	ENSMODG00000002322
opossum	ENSF00000001629	ENSMODP00000016988	ENSMODP00000000090	ENSMODG00000013578	ENSMODG00000000086
opossum	ENSF00000000482	ENSMODP00000017005	ENSMODP00000029105	ENSMODG00000013595	ENSMODG00000002823
opossum	ENSF00000000413	ENSMODP00000017081	ENSMODP00000032232	ENSMODG00000013658	ENSMODG00000023920
opossum	ENSF00000000593	ENSMODP00000017090	ENSMODP00000029968	ENSMODG00000004969	ENSMODG00000023470
opossum	ENSF00000000134	ENSMODP00000017093	ENSMODP00000035365	ENSMODG00000013668	ENSMODG00000024733
opossum	ENSF00000003923	ENSMODP00000017132	ENSMODP00000035053	ENSMODG00000013701	ENSMODG00000006570
opossum	ENSF00000000239	ENSMODP00000017165	ENSMODP00000035999	ENSMODG00000013730	ENSMODG00000024872
opossum	ENSF00000004873	ENSMODP00000017354	ENSMODP00000034467	ENSMODG00000013873	ENSMODG00000024527
opossum	ENSF00000004003	ENSMODP00000017392	ENSMODP00000037528	ENSMODG00000013904	ENSMODG00000025263
opossum	ENSF00000000965	ENSMODP00000017420	ENSMODP00000036493	ENSMODG00000013932	ENSMODG00000024983
opossum	ENSF00000002893	ENSMODP00000017421	ENSMODP00000018726	ENSMODG00000013933	ENSMODG00000014974
opossum	ENSF00000001851	ENSMODP00000017693	ENSMODP00000030484	ENSMODG00000014152	ENSMODG00000019790
opossum	ENSF00000003693	ENSMODP00000017809	ENSMODP00000011099	ENSMODG00000014252	ENSMODG00000008907
opossum	ENSF00000005729	ENSMODP00000017924	ENSMODP00000037359	ENSMODG00000014339	ENSMODG00000025204
opossum	ENSF00000008297	ENSMODP00000018152	ENSMODP00000034961	ENSMODG00000014528	ENSMODG00000024644
opossum	ENSF00000003711	ENSMODP00000018169	ENSMODP00000018167	ENSMODG00000014543	ENSMODG00000025072
opossum	ENSF00000000027	ENSMODP00000018225	ENSMODP00000004595	ENSMODG00000014592	ENSMODG00000003758
opossum	ENSF00000000098	ENSMODP00000018539	ENSMODP00000009449	ENSMODG00000014822	ENSMODG00000007613
opossum	ENSF00000002308	ENSMODP00000018716	ENSMODP00000010812	ENSMODG00000014967	ENSMODG00000008683
opossum	ENSF00000004542	ENSMODP00000018964	ENSMODP00000030940	ENSMODG00000015178	ENSMODG00000002836
opossum	ENSF00000008305	ENSMODP00000019010	ENSMODP00000019039	ENSMODG00000015219	ENSMODG00000015242
opossum	ENSF00000004809	ENSMODP00000019085	ENSMODP00000029221	ENSMODG00000015277	ENSMODG00000023272
opossum	ENSF00000002157	ENSMODP00000019271	ENSMODP00000000012	ENSMODG00000015439	ENSMODG00000000014
opossum	ENSF00000000643	ENSMODP00000019589	ENSMODP00000035453	ENSMODG00000015696	ENSMODG00000024751
opossum	ENSF00000002115	ENSMODP00000019945	ENSMODP00000035673	ENSMODG00000015980	ENSMODG00000024800
opossum	ENSF00000006319	ENSMODP00000020180	ENSMODP00000020181	ENSMODG00000016153	ENSMODG00000022582
opossum	ENSF00000000455	ENSMODP00000020271	ENSMODP00000033949	ENSMODG00000016218	ENSMODG00000024373
opossum	ENSF00000001311	ENSMODP00000020372	ENSMODP00000027848	ENSMODG00000016298	ENSMODG00000022964
opossum	ENSF00000000364	ENSMODP00000020385	ENSMODP00000013160	ENSMODG00000016310	ENSMODG00000010505
opossum	ENSF00000000058	ENSMODP00000020554	ENSMODP00000001247	ENSMODG00000016460	ENSMODG00000001053
opossum	ENSF00000008583	ENSMODP00000020635	ENSMODP00000020636	ENSMODG00000016528	ENSMODG00000022946
opossum	ENSF00000000841	ENSMODP00000020684	ENSMODP00000004165	ENSMODG00000016488	ENSMODG00000003404
opossum	ENSF00000000629	ENSMODP00000020849	ENSMODP00000034980	ENSMODG00000016705	ENSMODG00000024652
opossum	ENSF00000007814	ENSMODP00000020971	ENSMODP00000021688	ENSMODG00000016803	ENSMODG00000017377
opossum	ENSF00000005771	ENSMODP00000020980	ENSMODP00000033354	ENSMODG00000016808	ENSMODG00000006365
opossum	ENSF00000002818	ENSMODP00000021046	ENSMODP00000006555	ENSMODG00000016864	ENSMODG00000005318
opossum	ENSF00000000034	ENSMODP00000021207	ENSMODP00000005916	ENSMODG00000017001	ENSMODG00000023945
opossum	ENSF00000000113	ENSMODP00000021221	ENSMODP00000033076	ENSMODG00000017011	ENSMODG00000024105
opossum	ENSF00000003789	ENSMODP00000021230	ENSMODP00000032557	ENSMODG00000017017	ENSMODG00000024012
opossum	ENSF00000000963	ENSMODP00000021480	ENSMODP00000021484	ENSMODG00000017214	ENSMODG00000022963
opossum	ENSF00000001588	ENSMODP00000021746	ENSMODP00000014408	ENSMODG00000017423	ENSMODG00000024795
opossum	ENSF00000000672	ENSMODP00000021805	ENSMODP00000000009	ENSMODG00000017473	ENSMODG00000000011
opossum	ENSF00000003499	ENSMODP00000021838	ENSMODP00000032202	ENSMODG00000017505	ENSMODG00000023913
opossum	ENSF00000000287	ENSMODP00000022098	ENSMODP00000018334	ENSMODG00000017722	ENSMODG00000014668
opossum	ENSF00000000202	ENSMODP00000022169	ENSMODP00000005872	ENSMODG00000017782	ENSMODG00000004768
opossum	ENSF00000002847	ENSMODP00000022192	ENSMODP00000032688	ENSMODG00000017800	ENSMODG00000003513
opossum	ENSF00000003951	ENSMODP00000022798	ENSMODP00000020254	ENSMODG00000018283	ENSMODG00000016206
opossum	ENSF00000000229	ENSMODP00000023130	ENSMODP00000017919	ENSMODG00000018546	ENSMODG00000014335
opossum	ENSF00000000134	ENSMODP00000023580	ENSMODP00000036215	ENSMODG00000018901	ENSMODG00000024918
opossum	ENSF00000005192	ENSMODP00000023617	ENSMODP00000010386	ENSMODG00000018928	ENSMODG00000008355
opossum	ENSF00000008870	ENSMODP00000024007	ENSMODP00000032149	ENSMODG00000019234	ENSMODG00000023899
opossum	ENSF00000000244	ENSMODP00000024117	ENSMODP00000022388	ENSMODG00000019324	ENSMODG00000017952
opossum	ENSF00000007169	ENSMODP00000024203	ENSMODP00000010107	ENSMODG00000019402	ENSMODG00000008129
opossum	ENSF00000004994	ENSMODP00000024245	ENSMODP00000023379	ENSMODG00000019435	ENSMODG00000023216
opossum	ENSF00000000164	ENSMODP00000024306	ENSMODP00000023199	ENSMODG00000019485	ENSMODG00000018597
opossum	ENSF00000003248	ENSMODP00000024431	ENSMODP00000024434	ENSMODG00000019582	ENSMODG00000024288
opossum	ENSF00000000336	ENSMODP00000024490	ENSMODP00000026225	ENSMODG00000019631	ENSMODG00000020968
opossum	ENSF00000005014	ENSMODP00000025124	ENSMODP00000033349	ENSMODG00000020107	ENSMODG00000024148
opossum	ENSF00000006223	ENSMODP00000025130	ENSMODP00000008169	ENSMODG00000020110	ENSMODG00000006586
opossum	ENSF00000000314	ENSMODP00000025267	ENSMODP00000014064	ENSMODG00000020200	ENSMODG00000011241
opossum	ENSF00000006463	ENSMODP00000025467	ENSMODP00000025468	ENSMODG00000020362	ENSMODG00000023944
opossum	ENSF00000006844	ENSMODP00000025478	ENSMODP00000037146	ENSMODG00000020369	ENSMODG00000025136
opossum	ENSF00000003934	ENSMODP00000025708	ENSMODP00000032169	ENSMODG00000020549	ENSMODG00000023905
opossum	ENSF00000006488	ENSMODP00000025936	ENSMODP00000025937	ENSMODG00000020738	ENSMODG00000024899
opossum	ENSF00000002580	ENSMODP00000025988	ENSMODP00000026946	ENSMODG00000020776	ENSMODG00000022505
opossum	ENSF00000002538	ENSMODP00000026257	ENSMODP00000026981	ENSMODG00000020993	ENSMODG00000022587
opossum	ENSF00000002314	ENSMODP00000026317	ENSMODP00000037994	ENSMODG00000021047	ENSMODG00000025396
opossum	ENSF00000002552	ENSMODP00000026346	ENSMODP00000029187	ENSMODG00000021070	ENSMODG00000023267
opossum	ENSF00000001588	ENSMODP00000026675	ENSMODP00000035644	ENSMODG00000021344	ENSMODG00000021313
opossum	ENSF00000005325	ENSMODP00000027222	ENSMODP00000028431	ENSMODG00000022760	ENSMODG00000023108
opossum	ENSF00000000096	ENSMODP00000027377	ENSMODP00000037467	ENSMODG00000022809	ENSMODG00000025236
opossum	ENSF00000000885	ENSMODP00000027583	ENSMODP00000036657	ENSMODG00000013199	ENSMODG00000025043
opossum	ENSF00000006771	ENSMODP00000028764	ENSMODP00000032757	ENSMODG00000023181	ENSMODG00000024056
opossum	ENSF00000004524	ENSMODP00000029109	ENSMODP00000030396	ENSMODG00000002858	ENSMODG00000023552
opossum	ENSF00000000302	ENSMODP00000029696	ENSMODP00000017840	ENSMODG00000018122	ENSMODG00000014279
opossum	ENSF00000001989	ENSMODP00000029793	ENSMODP00000012256	ENSMODG00000023423	ENSMODG00000009805
opossum	ENSF00000000504	ENSMODP00000030548	ENSMODP00000010131	ENSMODG00000023582	ENSMODG00000008155
opossum	ENSF00000003119	ENSMODP00000032252	ENSMODP00000028479	ENSMODG00000023924	ENSMODG00000001412
opossum	ENSF00000000295	ENSMODP00000032282	ENSMODP00000037696	ENSMODG00000000740	ENSMODG00000025325
opossum	ENSF00000003374	ENSMODP00000032999	ENSMODP00000036603	ENSMODG00000008490	ENSMODG00000025020
opossum	ENSF00000000255	ENSMODP00000033588	ENSMODP00000031578	ENSMODG00000024206	ENSMODG00000023770
opossum	ENSF00000000281	ENSMODP00000033932	ENSMODP00000029648	ENSMODG00000004592	ENSMODG00000023360
opossum	ENSF00000006431	ENSMODP00000034931	ENSMODP00000006432	ENSMODG00000006373	ENSMODG00000005223
opossum	ENSF00000006936	ENSMODP00000035150	ENSMODP00000034924	ENSMODG00000024685	ENSMODG00000024624
opossum	ENSF00000003128	ENSMODP00000036400	ENSMODP00000033746	ENSMODG00000001586	ENSMODG00000024262
opossum	ENSF00000001206	ENSMODP00000036595	ENSMODP00000027408	ENSMODG00000025017	ENSMODG00000022821
opossum	ENSF00000001681	ENSMODP00000036596	ENSMODP00000038162	ENSMODG00000007717	ENSMODG00000025430
opossum	ENSF00000000140	ENSMODP00000037238	ENSMODP00000008625	ENSMODG00000020665	ENSMODG00000006958
opossum	ENSF00000003480	ENSMODP00000037781	ENSMODP00000036232	ENSMODG00000025346	ENSMODG00000024924
opossum	ENSF00000001035	ENSMODP00000038094	ENSMODP00000036539	ENSMODG00000009006	ENSMODG00000025002
opossum	ENSF00000000593	ENSMODP00000038259	ENSMODP00000029800	ENSMODG00000025478	ENSMODG00000023429
opossum	ENSF00000004691	ENSMODP00000038266	ENSMODP00000028154	ENSMODG00000025484	ENSMODG00000023069
opossum	ENSF00000000551	ENSMODP00000038418	ENSMODP00000034550	ENSMODG00000025608	ENSMODG00000015855
opossum	ENSF00000002890	ENSMODP00000038441	ENSMODP00000037205	ENSMODG00000025630	ENSMODG00000025155
opossum	ENSF00000009404	ENSMODP00000038577	ENSMODP00000036691	ENSMODG00000025731	ENSMODG00000025050
chicken	ENSF00000002465	ENSGALP00000000543	ENSGALP00000012577	ENSGALG00000000399	ENSGALG00000007765
chicken	ENSF00000005693	ENSGALP00000001955	ENSGALP00000032572	ENSGALG00000001281	ENSGALG00000020736
chicken	ENSF00000004810	ENSGALP00000002970	ENSGALP00000019983	ENSGALG00000001921	ENSGALG00000012252
chicken	ENSF00000005976	ENSGALP00000003138	ENSGALP00000035337	ENSGALG00000002019	ENSGALG00000022536
chicken	ENSF00000002605	ENSGALP00000003536	ENSGALP00000018403	ENSGALG00000002260	ENSGALG00000011295
chicken	ENSF00000000188	ENSGALP00000003668	ENSGALP00000035953	ENSGALG00000002334	ENSGALG00000016043
chicken	ENSF00000000034	ENSGALP00000003717	ENSGALP00000019120	ENSGALG00000002363	ENSGALG00000011715
chicken	ENSF00000000672	ENSGALP00000004027	ENSGALP00000023135	ENSGALG00000002553	ENSGALG00000014349
chicken	ENSF00000006771	ENSGALP00000004111	ENSGALP00000027863	ENSGALG00000002618	ENSGALG00000017266
chicken	ENSF00000002049	ENSGALP00000004263	ENSGALP00000001166	ENSGALG00000002708	ENSGALG00000000806
chicken	ENSF00000004452	ENSGALP00000004371	ENSGALP00000033985	ENSGALG00000002774	ENSGALG00000021452
chicken	ENSF00000000113	ENSGALP00000004944	ENSGALP00000035695	ENSGALG00000003134	ENSGALG00000022733
chicken	ENSF00000000079	ENSGALP00000005363	ENSGALP00000022413	ENSGALG00000003398	ENSGALG00000013838
chicken	ENSF00000002119	ENSGALP00000005517	ENSGALP00000010774	ENSGALG00000003492	ENSGALG00000006670
chicken	ENSF00000005520	ENSGALP00000005762	ENSGALP00000001940	ENSGALG00000003644	ENSGALG00000001273
chicken	ENSF00000002879	ENSGALP00000005837	ENSGALP00000026304	ENSGALG00000003691	ENSGALG00000016338
chicken	ENSF00000000354	ENSGALP00000006458	ENSGALP00000004432	ENSGALG00000004066	ENSGALG00000002808
chicken	ENSF00000004882	ENSGALP00000006992	ENSGALP00000009321	ENSGALG00000004393	ENSGALG00000005814
chicken	ENSF00000005291	ENSGALP00000007113	ENSGALP00000001190	ENSGALG00000004475	ENSGALG00000000818
chicken	ENSF00000001576	ENSGALP00000007267	ENSGALP00000032704	ENSGALG00000004573	ENSGALG00000020805
chicken	ENSF00000006562	ENSGALP00000007371	ENSGALP00000002479	ENSGALG00000004632	ENSGALG00000001626
chicken	ENSF00000001511	ENSGALP00000007751	ENSGALP00000008525	ENSGALG00000004860	ENSGALG00000005323
chicken	ENSF00000001437	ENSGALP00000007755	ENSGALP00000012991	ENSGALG00000004864	ENSGALG00000008014
chicken	ENSF00000000001	ENSGALP00000008614	ENSGALP00000021800	ENSGALG00000005375	ENSGALG00000013388
chicken	ENSF00000002038	ENSGALP00000009453	ENSGALP00000037027	ENSGALG00000005888	ENSGALG00000023131
chicken	ENSF00000000593	ENSGALP00000010269	ENSGALP00000023727	ENSGALG00000006362	ENSGALG00000014742
chicken	ENSF00000000188	ENSGALP00000010630	ENSGALP00000022158	ENSGALG00000006593	ENSGALG00000013648
chicken	ENSF00000003372	ENSGALP00000010639	ENSGALP00000022822	ENSGALG00000006600	ENSGALG00000014128
chicken	ENSF00000000388	ENSGALP00000010906	ENSGALP00000027601	ENSGALG00000006758	ENSGALG00000017117
chicken	ENSF00000000880	ENSGALP00000010997	ENSGALP00000008014	ENSGALG00000006808	ENSGALG00000005013
chicken	ENSF00000000134	ENSGALP00000011046	ENSGALP00000039444	ENSGALG00000006835	ENSGALG00000008424
chicken	ENSF00000001360	ENSGALP00000011095	ENSGALP00000022281	ENSGALG00000006863	ENSGALG00000013734
chicken	ENSF00000002414	ENSGALP00000011191	ENSGALP00000032267	ENSGALG00000006914	ENSGALG00000012381
chicken	ENSF00000001896	ENSGALP00000011504	ENSGALP00000027865	ENSGALG00000007111	ENSGALG00000017268
chicken	ENSF00000009196	ENSGALP00000011524	ENSGALP00000026209	ENSGALG00000007123	ENSGALG00000016286
chicken	ENSF00000000188	ENSGALP00000011781	ENSGALP00000011818	ENSGALG00000007280	ENSGALG00000007311
chicken	ENSF00000000556	ENSGALP00000014197	ENSGALP00000017360	ENSGALG00000008733	ENSGALG00000010683
chicken	ENSF00000000888	ENSGALP00000014468	ENSGALP00000040481	ENSGALG00000008908	ENSGALG00000024396
chicken	ENSF00000000336	ENSGALP00000014498	ENSGALP00000015509	ENSGALG00000008930	ENSGALG00000009539
chicken	ENSF00000004388	ENSGALP00000014571	ENSGALP00000017645	ENSGALG00000008969	ENSGALG00000010867
chicken	ENSF00000001441	ENSGALP00000014739	ENSGALP00000027791	ENSGALG00000009067	ENSGALG00000017228
chicken	ENSF00000000936	ENSGALP00000014948	ENSGALP00000027414	ENSGALG00000009187	ENSGALG00000017003
chicken	ENSF00000001129	ENSGALP00000015445	ENSGALP00000009512	ENSGALG00000009498	ENSGALG00000005923
chicken	ENSF00000002562	ENSGALP00000015775	ENSGALP00000011021	ENSGALG00000020737	ENSGALG00000006826
chicken	ENSF00000000865	ENSGALP00000016084	ENSGALP00000001263	ENSGALG00000009901	ENSGALG00000000863
chicken	ENSF00000000569	ENSGALP00000017159	ENSGALP00000039634	ENSGALG00000010556	ENSGALG00000004501
chicken	ENSF00000001330	ENSGALP00000017323	ENSGALP00000027168	ENSGALG00000010659	ENSGALG00000016849
chicken	ENSF00000000113	ENSGALP00000019017	ENSGALP00000015514	ENSGALG00000011651	ENSGALG00000009542
chicken	ENSF00000003701	ENSGALP00000019810	ENSGALP00000008000	ENSGALG00000012144	ENSGALG00000005005
chicken	ENSF00000004545	ENSGALP00000019897	ENSGALP00000009588	ENSGALG00000012202	ENSGALG00000005972
chicken	ENSF00000001511	ENSGALP00000020458	ENSGALP00000034226	ENSGALG00000012542	ENSGALG00000021552
chicken	ENSF00000001124	ENSGALP00000020812	ENSGALP00000024061	ENSGALG00000012773	ENSGALG00000014944
chicken	ENSF00000000517	ENSGALP00000021561	ENSGALP00000013967	ENSGALG00000013218	ENSGALG00000008589
chicken	ENSF00000001527	ENSGALP00000022252	ENSGALP00000024006	ENSGALG00000013710	ENSGALG00000014914
chicken	ENSF00000006601	ENSGALP00000022385	ENSGALP00000000958	ENSGALG00000013818	ENSGALG00000000678
chicken	ENSF00000002304	ENSGALP00000023714	ENSGALP00000000328	ENSGALG00000014735	ENSGALG00000000250
chicken	ENSF00000005209	ENSGALP00000024084	ENSGALP00000036143	ENSGALG00000014963	ENSGALG00000013766
chicken	ENSF00000000922	ENSGALP00000024126	ENSGALP00000036486	ENSGALG00000014985	ENSGALG00000014934
chicken	ENSF00000000388	ENSGALP00000024565	ENSGALP00000003607	ENSGALG00000015253	ENSGALG00000002298
chicken	ENSF00000001047	ENSGALP00000024609	ENSGALP00000026714	ENSGALG00000015274	ENSGALG00000016581
chicken	ENSF00000002491	ENSGALP00000024806	ENSGALP00000010621	ENSGALG00000015407	ENSGALG00000006586
chicken	ENSF00000000284	ENSGALP00000024868	ENSGALP00000013644	ENSGALG00000015450	ENSGALG00000008384
chicken	ENSF00000000244	ENSGALP00000025115	ENSGALP00000027629	ENSGALG00000015606	ENSGALG00000017137
chicken	ENSF00000001555	ENSGALP00000025530	ENSGALP00000040360	ENSGALG00000015865	ENSGALG00000024346
chicken	ENSF00000004672	ENSGALP00000025718	ENSGALP00000007112	ENSGALG00000015988	ENSGALG00000004474
chicken	ENSF00000000838	ENSGALP00000025751	ENSGALP00000000638	ENSGALG00000016013	ENSGALG00000000469
chicken	ENSF00000000381	ENSGALP00000025903	ENSGALP00000026488	ENSGALG00000016109	ENSGALG00000016448
chicken	ENSF00000002934	ENSGALP00000026119	ENSGALP00000008089	ENSGALG00000016227	ENSGALG00000005052
chicken	ENSF00000001629	ENSGALP00000026875	ENSGALP00000004047	ENSGALG00000016687	ENSGALG00000002570
chicken	ENSF00000002495	ENSGALP00000027276	ENSGALP00000012035	ENSGALG00000016906	ENSGALG00000007448
chicken	ENSF00000001254	ENSGALP00000027385	ENSGALP00000006226	ENSGALG00000016983	ENSGALG00000003916
chicken	ENSF00000000338	ENSGALP00000027462	ENSGALP00000031966	ENSGALG00000017029	ENSGALG00000020444
chicken	ENSF00000003826	ENSGALP00000027573	ENSGALP00000036509	ENSGALG00000017102	ENSGALG00000015068
chicken	ENSF00000000001	ENSGALP00000028749	ENSGALP00000001473	ENSGALG00000018597	ENSGALG00000000999
chicken	ENSF00000000881	ENSGALP00000029933	ENSGALP00000006789	ENSGALG00000012698	ENSGALG00000004276
chicken	ENSF00000010492	ENSGALP00000032309	ENSGALP00000006462	ENSGALG00000010394	ENSGALG00000004069
chicken	ENSF00000002119	ENSGALP00000033543	ENSGALP00000018650	ENSGALG00000021220	ENSGALG00000011451
chicken	ENSF00000003694	ENSGALP00000034313	ENSGALP00000012522	ENSGALG00000021589	ENSGALG00000007732
chicken	ENSF00000001629	ENSGALP00000034361	ENSGALP00000037768	ENSGALG00000021610	ENSGALG00000023379
chicken	ENSF00000001088	ENSGALP00000034401	ENSGALP00000008876	ENSGALG00000021623	ENSGALG00000005541
chicken	ENSF00000001668	ENSGALP00000034566	ENSGALP00000007854	ENSGALG00000000769	ENSGALG00000004918
chicken	ENSF00000000001	ENSGALP00000034822	ENSGALP00000040347	ENSGALG00000022047	ENSGALG00000024335
chicken	ENSF00000000381	ENSGALP00000035286	ENSGALP00000033115	ENSGALG00000022481	ENSGALG00000005502
chicken	ENSF00000004894	ENSGALP00000035443	ENSGALP00000015353	ENSGALG00000022635	ENSGALG00000009439
chicken	ENSF00000000455	ENSGALP00000035636	ENSGALP00000014709	ENSGALG00000022718	ENSGALG00000009046
chicken	ENSF00000000146	ENSGALP00000036155	ENSGALP00000013602	ENSGALG00000022885	ENSGALG00000008362
chicken	ENSF00000006278	ENSGALP00000037126	ENSGALP00000017499	ENSGALG00000009724	ENSGALG00000010773
chicken	ENSF00000001869	ENSGALP00000037169	ENSGALP00000011895	ENSGALG00000011957	ENSGALG00000007364
chicken	ENSF00000001931	ENSGALP00000037482	ENSGALP00000039928	ENSGALG00000023277	ENSGALG00000004168
chicken	ENSF00000000270	ENSGALP00000037924	ENSGALP00000009933	ENSGALG00000009250	ENSGALG00000006160
chicken	ENSF00000003303	ENSGALP00000038130	ENSGALP00000015374	ENSGALG00000010410	ENSGALG00000009457
chicken	ENSF00000000018	ENSGALP00000038669	ENSGALP00000001611	ENSGALG00000008779	ENSGALG00000001078
chicken	ENSF00000000396	ENSGALP00000039370	ENSGALP00000026544	ENSGALG00000001569	ENSGALG00000016485
chicken	ENSF00000001366	ENSGALP00000039390	ENSGALP00000021396	ENSGALG00000001547	ENSGALG00000013125
chicken	ENSF00000000329	ENSGALP00000039632	ENSGALP00000004703	ENSGALG00000008125	ENSGALG00000002977
chicken	ENSF00000001477	ENSGALP00000039793	ENSGALP00000013735	ENSGALG00000024056	ENSGALG00000008440
chicken	ENSF00000002556	ENSGALP00000040017	ENSGALP00000034875	ENSGALG00000013665	ENSGALG00000018660
chicken	ENSF00000003061	ENSGALP00000040473	ENSGALP00000037614	ENSGALG00000024393	ENSGALG00000023330
chicken	ENSF00000000055	ENSGALP00000040497	ENSGALP00000027336	ENSGALG00000000760	ENSGALG00000016944
zbfish	ENSF00000005976	ENSDARP00000004158	ENSDARP00000086481	ENSDARG00000015601	ENSDARG00000063156
zbfish	ENSF00000000251	ENSDARP00000006334	ENSDARP00000017944	ENSDARG00000008662	ENSDARG00000016427
zbfish	ENSF00000000164	ENSDARP00000006410	ENSDARP00000085869	ENSDARG00000012788	ENSDARG00000062892
zbfish	ENSF00000000532	ENSDARP00000007619	ENSDARP00000057801	ENSDARG00000005846	ENSDARG00000039561
zbfish	ENSF00000000217	ENSDARP00000008075	ENSDARP00000071699	ENSDARG00000020237	ENSDARG00000054949
zbfish	ENSF00000000113	ENSDARP00000008099	ENSDARP00000074763	ENSDARG00000015404	ENSDARG00000057606
zbfish	ENSF00000005292	ENSDARP00000008922	ENSDARP00000090418	ENSDARG00000043557	ENSDARG00000068808
zbfish	ENSF00000002466	ENSDARP00000009601	ENSDARP00000070066	ENSDARG00000020102	ENSDARG00000053542
zbfish	ENSF00000003707	ENSDARP00000009884	ENSDARP00000083120	ENSDARG00000004447	ENSDARG00000061846
zbfish	ENSF00000005710	ENSDARP00000009901	ENSDARP00000060149	ENSDARG00000018145	ENSDARG00000041051
zbfish	ENSF00000006125	ENSDARP00000011640	ENSDARP00000075890	ENSDARG00000015863	ENSDARG00000058565
zbfish	ENSF00000000113	ENSDARP00000013210	ENSDARP00000069359	ENSDARG00000018627	ENSDARG00000052928
zbfish	ENSF00000003693	ENSDARP00000013217	ENSDARP00000084963	ENSDARG00000007848	ENSDARG00000062517
zbfish	ENSF00000005209	ENSDARP00000015121	ENSDARP00000082121	ENSDARG00000017988	ENSDARG00000061461
zbfish	ENSF00000000556	ENSDARP00000017368	ENSDARP00000089178	ENSDARG00000009776	ENSDARG00000068170
zbfish	ENSF00000001060	ENSDARP00000018003	ENSDARP00000050028	ENSDARG00000012135	ENSDARG00000034497
zbfish	ENSF00000000558	ENSDARP00000018197	ENSDARP00000048394	ENSDARG00000017441	ENSDARG00000032976
zbfish	ENSF00000000146	ENSDARP00000018244	ENSDARP00000044732	ENSDARG00000007842	ENSDARG00000033393
zbfish	ENSF00000000354	ENSDARP00000019014	ENSDARP00000096874	ENSDARG00000007490	ENSDARG00000071640
zbfish	ENSF00000001457	ENSDARP00000019307	ENSDARP00000051206	ENSDARG00000019294	ENSDARG00000035337
zbfish	ENSF00000000569	ENSDARP00000019538	ENSDARP00000004126	ENSDARG00000018298	ENSDARG00000058980
zbfish	ENSF00000001035	ENSDARP00000019940	ENSDARP00000050618	ENSDARG00000009131	ENSDARG00000030090
zbfish	ENSF00000000253	ENSDARP00000021277	ENSDARP00000049135	ENSDARG00000012968	ENSDARG00000030608
zbfish	ENSF00000002690	ENSDARP00000023325	ENSDARP00000011663	ENSDARG00000006275	ENSDARG00000004297
zbfish	ENSF00000001545	ENSDARP00000027775	ENSDARP00000042367	ENSDARG00000020169	ENSDARG00000031657
zbfish	ENSF00000000113	ENSDARP00000028911	ENSDARP00000046422	ENSDARG00000028846	ENSDARG00000032708
zbfish	ENSF00000002499	ENSDARP00000029663	ENSDARP00000023365	ENSDARG00000015959	ENSDARG00000005026
zbfish	ENSF00000004565	ENSDARP00000029727	ENSDARP00000043290	ENSDARG00000024212	ENSDARG00000034907
zbfish	ENSF00000009793	ENSDARP00000031440	ENSDARP00000028948	ENSDARG00000024299	ENSDARG00000026550
zbfish	ENSF00000003464	ENSDARP00000032214	ENSDARP00000012462	ENSDARG00000037493	ENSDARG00000016739
zbfish	ENSF00000009592	ENSDARP00000033094	ENSDARP00000048857	ENSDARG00000025615	ENSDARG00000029308
zbfish	ENSF00000008062	ENSDARP00000033310	ENSDARP00000076512	ENSDARG00000022512	ENSDARG00000059063
zbfish	ENSF00000000001	ENSDARP00000036300	ENSDARP00000053299	ENSDARG00000022952	ENSDARG00000036698
zbfish	ENSF00000000364	ENSDARP00000036600	ENSDARP00000071107	ENSDARG00000025420	ENSDARG00000054438
zbfish	ENSF00000001511	ENSDARP00000038292	ENSDARP00000024056	ENSDARG00000028066	ENSDARG00000012772
zbfish	ENSF00000000364	ENSDARP00000039219	ENSDARP00000056304	ENSDARG00000022591	ENSDARG00000038569
zbfish	ENSF00000000217	ENSDARP00000040072	ENSDARP00000088561	ENSDARG00000031348	ENSDARG00000021369
zbfish	ENSF00000000202	ENSDARP00000040274	ENSDARP00000085200	ENSDARG00000031438	ENSDARG00000062618
zbfish	ENSF00000000244	ENSDARP00000042122	ENSDARP00000075002	ENSDARG00000034930	ENSDARG00000057792
zbfish	ENSF00000000566	ENSDARP00000042392	ENSDARP00000044153	ENSDARG00000031920	ENSDARG00000032242
zbfish	ENSF00000000881	ENSDARP00000042962	ENSDARP00000049006	ENSDARG00000034375	ENSDARG00000028786
zbfish	ENSF00000000054	ENSDARP00000045391	ENSDARP00000021250	ENSDARG00000035438	ENSDARG00000015618
zbfish	ENSF00000005471	ENSDARP00000045677	ENSDARP00000056303	ENSDARG00000031537	ENSDARG00000038568
zbfish	ENSF00000001553	ENSDARP00000045990	ENSDARP00000073157	ENSDARG00000018006	ENSDARG00000056231
zbfish	ENSF00000002890	ENSDARP00000046383	ENSDARP00000041701	ENSDARG00000002830	ENSDARG00000033967
zbfish	ENSF00000000044	ENSDARP00000047268	ENSDARP00000076584	ENSDARG00000033009	ENSDARG00000059124
zbfish	ENSF00000001668	ENSDARP00000047749	ENSDARP00000085114	ENSDARG00000033654	ENSDARG00000062576
zbfish	ENSF00000000462	ENSDARP00000048217	ENSDARP00000009841	ENSDARG00000019932	ENSDARG00000010376
zbfish	ENSF00000000329	ENSDARP00000050808	ENSDARP00000073876	ENSDARG00000032725	ENSDARG00000056851
zbfish	ENSF00000000364	ENSDARP00000050969	ENSDARP00000006458	ENSDARG00000035185	ENSDARG00000014673
zbfish	ENSF00000005857	ENSDARP00000051242	ENSDARP00000024291	ENSDARG00000035367	ENSDARG00000015964
zbfish	ENSF00000001088	ENSDARP00000051538	ENSDARP00000095556	ENSDARG00000035553	ENSDARG00000071042
zbfish	ENSF00000002049	ENSDARP00000052112	ENSDARP00000041819	ENSDARG00000035899	ENSDARG00000034165
zbfish	ENSF00000000325	ENSDARP00000052254	ENSDARP00000073435	ENSDARG00000009161	ENSDARG00000056470
zbfish	ENSF00000002495	ENSDARP00000052422	ENSDARP00000090302	ENSDARG00000036108	ENSDARG00000068732
zbfish	ENSF00000000188	ENSDARP00000052976	ENSDARP00000091991	ENSDARG00000036463	ENSDARG00000069505
zbfish	ENSF00000005838	ENSDARP00000053793	ENSDARP00000053329	ENSDARG00000037009	ENSDARG00000036725
zbfish	ENSF00000003694	ENSDARP00000054597	ENSDARP00000035812	ENSDARG00000037495	ENSDARG00000025697
zbfish	ENSF00000006129	ENSDARP00000055086	ENSDARP00000058050	ENSDARG00000037804	ENSDARG00000039714
zbfish	ENSF00000003589	ENSDARP00000055261	ENSDARP00000052419	ENSDARG00000037916	ENSDARG00000036105
zbfish	ENSF00000000685	ENSDARP00000055705	ENSDARP00000055708	ENSDARG00000054560	ENSDARG00000038205
zbfish	ENSF00000005992	ENSDARP00000056316	ENSDARP00000003629	ENSDARG00000038574	ENSDARG00000017470
zbfish	ENSF00000001856	ENSDARP00000056381	ENSDARP00000066295	ENSDARG00000042613	ENSDARG00000045089
zbfish	ENSF00000002380	ENSDARP00000057319	ENSDARP00000030390	ENSDARG00000039234	ENSDARG00000021497
zbfish	ENSF00000000455	ENSDARP00000058419	ENSDARP00000003520	ENSDARG00000039939	ENSDARG00000016460
zbfish	ENSF00000008181	ENSDARP00000058744	ENSDARP00000058464	ENSDARG00000040162	ENSDARG00000039963
zbfish	ENSF00000000130	ENSDARP00000058876	ENSDARP00000058966	ENSDARG00000040246	ENSDARG00000040296
zbfish	ENSF00000000238	ENSDARP00000058877	ENSDARP00000032650	ENSDARG00000040247	ENSDARG00000010384
zbfish	ENSF00000002268	ENSDARP00000059326	ENSDARP00000017198	ENSDARG00000040538	ENSDARG00000016084
zbfish	ENSF00000001124	ENSDARP00000059440	ENSDARP00000079686	ENSDARG00000040608	ENSDARG00000060471
zbfish	ENSF00000006562	ENSDARP00000059827	ENSDARP00000082311	ENSDARG00000040816	ENSDARG00000061538
zbfish	ENSF00000000655	ENSDARP00000059868	ENSDARP00000062053	ENSDARG00000040841	ENSDARG00000042315
zbfish	ENSF00000000146	ENSDARP00000059943	ENSDARP00000053849	ENSDARG00000040901	ENSDARG00000037048
zbfish	ENSF00000003916	ENSDARP00000060521	ENSDARP00000075859	ENSDARG00000041292	ENSDARG00000058535
zbfish	ENSF00000000686	ENSDARP00000060734	ENSDARP00000086484	ENSDARG00000041431	ENSDARG00000063158
zbfish	ENSF00000000164	ENSDARP00000062302	ENSDARP00000072219	ENSDARG00000042485	ENSDARG00000055398
zbfish	ENSF00000001851	ENSDARP00000062628	ENSDARP00000016895	ENSDARG00000042689	ENSDARG00000013492
zbfish	ENSF00000005842	ENSDARP00000063479	ENSDARP00000096301	ENSDARG00000043239	ENSDARG00000071399
zbfish	ENSF00000000151	ENSDARP00000063913	ENSDARP00000067146	ENSDARG00000043533	ENSDARG00000045666
zbfish	ENSF00000001610	ENSDARP00000064109	ENSDARP00000007507	ENSDARG00000043664	ENSDARG00000020744
zbfish	ENSF00000001477	ENSDARP00000065118	ENSDARP00000081870	ENSDARG00000044341	ENSDARG00000061357
zbfish	ENSF00000010427	ENSDARP00000065312	ENSDARP00000048963	ENSDARG00000044475	ENSDARG00000032380
zbfish	ENSF00000000888	ENSDARP00000066409	ENSDARP00000092102	ENSDARG00000045166	ENSDARG00000069552
zbfish	ENSF00000000237	ENSDARP00000066871	ENSDARP00000076150	ENSDARG00000026417	ENSDARG00000058774
zbfish	ENSF00000000026	ENSDARP00000067159	ENSDARP00000011562	ENSDARG00000045677	ENSDARG00000002193
zbfish	ENSF00000000482	ENSDARP00000067265	ENSDARP00000092415	ENSDARG00000045760	ENSDARG00000069706
zbfish	ENSF00000000001	ENSDARP00000068201	ENSDARP00000076570	ENSDARG00000051985	ENSDARG00000059109
zbfish	ENSF00000000517	ENSDARP00000068234	ENSDARP00000059000	ENSDARG00000052017	ENSDARG00000040319
zbfish	ENSF00000000581	ENSDARP00000068817	ENSDARP00000068814	ENSDARG00000052466	ENSDARG00000052465
zbfish	ENSF00000000354	ENSDARP00000069349	ENSDARP00000056809	ENSDARG00000052919	ENSDARG00000038918
zbfish	ENSF00000005626	ENSDARP00000069754	ENSDARP00000087988	ENSDARG00000053257	ENSDARG00000067546
zbfish	ENSF00000005329	ENSDARP00000069814	ENSDARP00000006147	ENSDARG00000053301	ENSDARG00000005579
zbfish	ENSF00000011954	ENSDARP00000069864	ENSDARP00000071026	ENSDARG00000053345	ENSDARG00000054363
zbfish	ENSF00000000552	ENSDARP00000069999	ENSDARP00000003126	ENSDARG00000053479	ENSDARG00000002760
zbfish	ENSF00000000363	ENSDARP00000070021	ENSDARP00000026207	ENSDARG00000053502	ENSDARG00000002204
zbfish	ENSF00000000041	ENSDARP00000070530	ENSDARP00000002787	ENSDARG00000053929	ENSDARG00000007553
zbfish	ENSF00000006889	ENSDARP00000070996	ENSDARP00000065218	ENSDARG00000054342	ENSDARG00000044408
zbfish	ENSF00000013097	ENSDARP00000071237	ENSDARP00000058465	ENSDARG00000038056	ENSDARG00000039964
zbfish	ENSF00000000113	ENSDARP00000071659	ENSDARP00000086622	ENSDARG00000069496	ENSDARG00000063223
zbfish	ENSF00000002295	ENSDARP00000071951	ENSDARP00000005108	ENSDARG00000055162	ENSDARG00000019774
zbfish	ENSF00000004089	ENSDARP00000073071	ENSDARP00000059225	ENSDARG00000056163	ENSDARG00000040463
zbfish	ENSF00000006435	ENSDARP00000073715	ENSDARP00000041584	ENSDARG00000056718	ENSDARG00000033508
zbfish	ENSF00000002465	ENSDARP00000074788	ENSDARP00000077701	ENSDARG00000057625	ENSDARG00000059697
zbfish	ENSF00000000113	ENSDARP00000075053	ENSDARP00000053220	ENSDARG00000057857	ENSDARG00000036637
zbfish	ENSF00000000034	ENSDARP00000075275	ENSDARP00000004394	ENSDARG00000058030	ENSDARG00000056210
zbfish	ENSF00000000302	ENSDARP00000076317	ENSDARP00000035042	ENSDARG00000058924	ENSDARG00000023662
zbfish	ENSF00000000517	ENSDARP00000076421	ENSDARP00000087773	ENSDARG00000058991	ENSDARG00000063704
zbfish	ENSF00000000922	ENSDARP00000077475	ENSDARP00000022348	ENSDARG00000059616	ENSDARG00000012249
zbfish	ENSF00000001576	ENSDARP00000077765	ENSDARP00000083857	ENSDARG00000059718	ENSDARG00000062113
zbfish	ENSF00000006936	ENSDARP00000078105	ENSDARP00000081081	ENSDARG00000059854	ENSDARG00000061049
zbfish	ENSF00000000589	ENSDARP00000078258	ENSDARP00000041304	ENSDARG00000059899	ENSDARG00000032991
zbfish	ENSF00000002605	ENSDARP00000079296	ENSDARP00000033824	ENSDARG00000060316	ENSDARG00000045557
zbfish	ENSF00000002444	ENSDARP00000079325	ENSDARP00000053923	ENSDARG00000060330	ENSDARG00000037099
zbfish	ENSF00000000686	ENSDARP00000079886	ENSDARP00000041623	ENSDARG00000036383	ENSDARG00000069181
zbfish	ENSF00000000965	ENSDARP00000080484	ENSDARP00000023480	ENSDARG00000060801	ENSDARG00000008540
zbfish	ENSF00000001490	ENSDARP00000080548	ENSDARP00000088630	ENSDARG00000060819	ENSDARG00000067907
zbfish	ENSF00000002328	ENSDARP00000080736	ENSDARP00000090165	ENSDARG00000070317	ENSDARG00000068657
zbfish	ENSF00000005545	ENSDARP00000081311	ENSDARP00000054076	ENSDARG00000061144	ENSDARG00000037186
zbfish	ENSF00000009533	ENSDARP00000081999	ENSDARP00000088660	ENSDARG00000061405	ENSDARG00000067927
zbfish	ENSF00000000336	ENSDARP00000082057	ENSDARP00000069611	ENSDARG00000061432	ENSDARG00000053133
zbfish	ENSF00000011334	ENSDARP00000082372	ENSDARP00000085408	ENSDARG00000061562	ENSDARG00000062712
zbfish	ENSF00000006771	ENSDARP00000082410	ENSDARP00000087528	ENSDARG00000061580	ENSDARG00000063600
zbfish	ENSF00000000381	ENSDARP00000082439	ENSDARP00000034538	ENSDARG00000061622	ENSDARG00000027285
zbfish	ENSF00000001215	ENSDARP00000082628	ENSDARP00000076641	ENSDARG00000061662	ENSDARG00000059161
zbfish	ENSF00000000672	ENSDARP00000085437	ENSDARP00000086722	ENSDARG00000062720	ENSDARG00000063264
zbfish	ENSF00000005471	ENSDARP00000087887	ENSDARP00000031570	ENSDARG00000067489	ENSDARG00000027919
zbfish	ENSF00000003276	ENSDARP00000088082	ENSDARP00000066987	ENSDARG00000067593	ENSDARG00000045555
zbfish	ENSF00000019629	ENSDARP00000088397	ENSDARP00000055259	ENSDARG00000067780	ENSDARG00000037914
zbfish	ENSF00000011290	ENSDARP00000088466	ENSDARP00000088818	ENSDARG00000067825	ENSDARG00000067984
zbfish	ENSF00000013651	ENSDARP00000090022	ENSDARP00000088870	ENSDARG00000068585	ENSDARG00000068007
zbfish	ENSF00000004894	ENSDARP00000090236	ENSDARP00000019274	ENSDARG00000068701	ENSDARG00000006607
zbfish	ENSF00000003464	ENSDARP00000091743	ENSDARP00000005494	ENSDARG00000069402	ENSDARG00000003020
zbfish	ENSF00000000188	ENSDARP00000092862	ENSDARP00000025285	ENSDARG00000069888	ENSDARG00000009215
zbfish	ENSF00000000146	ENSDARP00000093729	ENSDARP00000076547	ENSDARG00000070251	ENSDARG00000059090
zbfish	ENSF00000002414	ENSDARP00000093896	ENSDARP00000086634	ENSDARG00000033447	ENSDARG00000063224
zbfish	ENSF00000001088	ENSDARP00000093937	ENSDARP00000076587	ENSDARG00000070362	ENSDARG00000059127
zbfish	ENSF00000001397	ENSDARP00000094556	ENSDARP00000084661	ENSDARG00000041912	ENSDARG00000062398
zbfish	ENSF00000001740	ENSDARP00000095500	ENSDARP00000002817	ENSDARG00000071012	ENSDARG00000008098
zbfish	ENSF00000007858	ENSDARP00000096022	ENSDARP00000064198	ENSDARG00000071259	ENSDARG00000043718
zbfish	ENSF00000000413	ENSDARP00000096898	ENSDARP00000074935	ENSDARG00000071658	ENSDARG00000067626
fly	ENSF00000000112	CG10000-PA	CG7480-PA	CG10000	CG7480
fly	ENSF00000000485	CG10160-PA	CG13334-PA	CG10160	CG13334
fly	ENSF00000000251	CG10229-PA	CG10793-PA	CG10229	CG10793
fly	ENSF00000000493	CG10237-PB	CG10546-PA	CG10237	CG10546
fly	ENSF00000002106	CG10298-PA	CG6180-PA	CG10298	CG6180
fly	ENSF00000000229	CG10333-PA	CG6418-PB	CG10333	CG6418
fly	ENSF00000010449	CG10337-PA	CG3592-PA	CG10337	CG3592
fly	ENSF00000002484	CG10365-PA	CG2540-PA	CG10365	CG2540
fly	ENSF00000000357	CG1046-PA	CG11551-PA	CG1046	CG11551
fly	ENSF00000006713	CG10512-PA	CG17199-PA	CG10512	CG17199
fly	ENSF00000001481	CG10561-PA	CG7460-PB	CG10561	CG7460
fly	ENSF00000002876	CG1065-PA	CG6255-PA	CG1065	CG6255
fly	ENSF00000000560	CG10672-PA	CG3699-PA	CG10672	CG3699
fly	ENSF00000004839	CG1076-PA	CG8210-PA	CG1076	CG8210
fly	ENSF00000003785	CG10822-PA	CG10838-PA	CG10822	CG10838
fly	ENSF00000000491	CG10938-PB	CG1736-PA	CG10938	CG1736
fly	ENSF00000000262	CG10951-PA	CG17256-PA	CG10951	CG17256
fly	ENSF00000003411	CG1101-PA	CG17031-PA	CG1101	CG17031
fly	ENSF00000002056	CG11023-PA	CG32110-PA	CG11023	CG32110
fly	ENSF00000000484	CG11228-PA	CG5169-PA	CG11228	CG5169
fly	ENSF00000000336	CG11357-PA	CG4934-PA	CG11357	CG4934
fly	ENSF00000002378	CG1158-PA	CG1724-PA	CG1158	CG1724
fly	ENSF00000008496	CG11591-PA	CG6444-PA	CG11591	CG6444
fly	ENSF00000000001	CG11902-PA	CG12701-PA	CG11902	CG12701
fly	ENSF00000001429	CG11920-PA	CG6712-PA	CG11920	CG6712
fly	ENSF00000000595	CG11958-PB	CG9906-PA	CG11958	CG9906
fly	ENSF00000001497	CG12021-PC	CG15803-PA	CG12021	CG15803
fly	ENSF00000001229	CG12101-PB	CG2830-PA	CG12101	CG2830
fly	ENSF00000003409	CG12157-PA	CG8330-PA	CG12157	CG8330
fly	ENSF00000005065	CG12194-PA	CG8602-PA	CG12194	CG8602
fly	ENSF00000000638	CG12233-PB	CG3483-PA	CG12233	CG3483
fly	ENSF00000000200	CG12256-PA	CG7754-PA	CG12256	CG7754
fly	ENSF00000001060	CG12402-PA	CG9952-PA	CG12402	CG9952
fly	ENSF00000000823	CG12529-PA	CG7140-PA	CG12529	CG7140
fly	ENSF00000004896	CG12787-PC	CG11262-PA	CG12787	CG11262
fly	ENSF00000000438	CG1330-PA	CG9283-PA	CG1330	CG9283
fly	ENSF00000001986	CG13318-PA	CG18563-PA	CG13318	CG18563
fly	ENSF00000000532	CG1343-PA	CG5669-PA	CG1343	CG5669
fly	ENSF00000000929	CG13588-PA	CG10889-PA	CG13588	CG10889
fly	ENSF00000000241	CG14032-PA	CG3972-PA	CG14032	CG3972
fly	ENSF00000002428	CG1404-PA	CG7815-PA	CG1404	CG7815
fly	ENSF00000001999	CG14206-PC	CG12275-PA	CG14206	CG12275
fly	ENSF00000009941	CG14214-PA	CG8860-PA	CG14214	CG8860
fly	ENSF00000004802	CG14222-PA	CG31851-PA	CG14222	CG31851
fly	ENSF00000001029	CG1453-PE	CG3219-PA	CG1453	CG3219
fly	ENSF00000008977	CG14534-PA	CG8986-PA	CG14534	CG8986
fly	ENSF00000003384	CG14542-PA	CG4618-PA	CG14542	CG4618
fly	ENSF00000000557	CG14583-PA	CG12274-PA	CG14583	CG12274
fly	ENSF00000008740	CG14612-PA	CG15191-PA	CG14612	CG15191
fly	ENSF00000005290	CG14731-PA	CG11630-PA	CG14731	CG11630
fly	ENSF00000007008	CG14816-PA	CG15874-PA	CG14816	CG15874
fly	ENSF00000014164	CG14916-PA	CG7303-PA	CG14916	CG7303
fly	ENSF00000005924	CG14995-PA	CG15208-PA	CG14995	CG15208
fly	ENSF00000000592	CG15151-PA	CG7800-PA	CG15151	CG7800
fly	ENSF00000000001	CG15269-PA	CG8089-PA	CG15269	CG8089
fly	ENSF00000001259	CG15306-PA	CG31907-PA	CG15306	CG31907
fly	ENSF00000005389	CG15445-PD	CG5111-PA	CG15445	CG5111
fly	ENSF00000015336	CG15580-PA	CG18171-PA	CG15580	CG18171
fly	ENSF00000002514	CG15609-PC	CG11259-PA	CG15609	CG11259
fly	ENSF00000004896	CG15624-PA	CG13801-PA	CG15624	CG13801
fly	ENSF00000008419	CG15645-PA	CG13732-PA	CG15645	CG13732
fly	ENSF00000015990	CG15653-PA	CG31913-PA	CG15653	CG31913
fly	ENSF00000013145	CG15717-PA	CG13539-PA	CG15717	CG13539
fly	ENSF00000017926	CG1668-PB	CG6641-PA	CG1668	CG6641
fly	ENSF00000002079	CG16758-PB	CG18128-PA	CG16758	CG18128
fly	ENSF00000000590	CG1709-PE	CG30329-PA	CG1709	CG30329
fly	ENSF00000001117	CG17146-PB	CG6092-PA	CG17146	CG6092
fly	ENSF00000001923	CG17246-PA	CG5718-PA	CG17246	CG5718
fly	ENSF00000004073	CG1740-PA	CG10174-PA	CG1740	CG10174
fly	ENSF00000001329	CG1743-PC	CG2718-PC	CG1743	CG2718
fly	ENSF00000000592	CG1744-PA	CG8595-PA	CG1744	CG8595
fly	ENSF00000000469	CG1756-PA	CG10864-PA	CG1756	CG10864
fly	ENSF00000000001	CG17801-PA	CG3847-PA	CG17801	CG3847
fly	ENSF00000000001	CG17802-PA	CG17612-PA	CG17802	CG17612
fly	ENSF00000008249	CG1804-PA	CG4977-PA	CG1804	CG4977
fly	ENSF00000000592	CG18095-PA	CG4950-PA	CG18095	CG4950
fly	ENSF00000000970	CG18493-PA	CG2493-PA	CG18493	CG2493
fly	ENSF00000000001	CG18764-PA	CG3032-PA	CG18764	CG3032
fly	ENSF00000001567	CG18815-PC	CG6567-PA	CG18815	CG6567
fly	ENSF00000000073	CG1916-PA	CG8458-PA	CG1916	CG8458
fly	ENSF00000001295	CG1967-PA	CG9308-PA	CG1967	CG9308
fly	ENSF00000004257	CG2022-PA	CG5906-PA	CG2022	CG5906
fly	ENSF00000000317	CG2028-PA	CG12147-PA	CG2028	CG12147
fly	ENSF00000002697	CG2033-PE	CG12324-PA	CG2033	CG12324
fly	ENSF00000002935	CG2059-PA	CG14717-PA	CG2059	CG14717
fly	ENSF00000003469	CG2076-PA	CG1287-PA	CG2076	CG1287
fly	ENSF00000000764	CG2151-PB	CG11401-PA	CG2151	CG11401
fly	ENSF00000003824	CG2161-PA	CG15262-PA	CG2161	CG15262
fly	ENSF00000002013	CG2543-PA	CG31773-PA	CG2543	CG31773
fly	ENSF00000001789	CG2656-PA	CG10222-PA	CG2656	CG10222
fly	ENSF00000004143	CG2713-PA	CG6691-PA	CG2713	CG6691
fly	ENSF00000004445	CG2818-PA	CG11619-PA	CG2818	CG11619
fly	ENSF00000001011	CG2845-PA	CG2899-PA	CG2845	CG2899
fly	ENSF00000008257	CG2998-PA	CG15527-PA	CG2998	CG15527
fly	ENSF00000006612	CG3034-PA	CG32971-PA	CG3034	CG32971
fly	ENSF00000000001	CG30431-PA	CG9215-PA	CG30431	CG9215
fly	ENSF00000000606	CG31090-PA	CG32669-PA	CG31090	CG32669
fly	ENSF00000000219	CG31293-PA	CG4039-PA	CG31293	CG4039
fly	ENSF00000004907	CG3153-PA	CG7291-PA	CG3153	CG7291
fly	ENSF00000001194	CG31624-PA	CG30178-PA	CG31624	CG30178
fly	ENSF00000009209	CG31715-PA	CG7423-PA	CG31715	CG7423
fly	ENSF00000001258	CG3172-PA	CG17293-PA	CG3172	CG17293
fly	ENSF00000000684	CG31884-PA	CG4193-PA	CG31884	CG4193
fly	ENSF00000001286	CG3198-PA	CG7564-PA	CG3198	CG7564
fly	ENSF00000006757	CG3200-PA	CG15912-PA	CG3200	CG15912
fly	ENSF00000000558	CG3201-PA	CG17237-PA	CG3201	CG17237
fly	ENSF00000000592	CG32055-PA	CG5810-PA	CG32055	CG5810
fly	ENSF00000000965	CG32139-PA	CG18024-PA	CG32139	CG18024
fly	ENSF00000003173	CG32444-PA	CG10996-PA	CG32444	CG10996
fly	ENSF00000002053	CG32484-PA	CG1747-PA	CG32484	CG1747
fly	ENSF00000000999	CG32672-PA	CG12334-PA	CG32672	CG12334
fly	ENSF00000000635	CG32684-PG	CG31202-PA	CG32684	CG31202
fly	ENSF00000002997	CG32742-PA	CG5790-PA	CG32742	CG5790
fly	ENSF00000000081	CG32755-PA	CG11912-PA	CG32755	CG11912
fly	ENSF00000002159	CG3289-PA	CG8509-PA	CG3289	CG8509
fly	ENSF00000002345	CG33092-PF	CG6661-PA	CG33092	CG6661
fly	ENSF00000000684	CG3315-PA	CG13473-PA	CG3315	CG13473
fly	ENSF00000024677	CG33460-PA	CG14088-PA	CG33460	CG14088
fly	ENSF00000002507	CG3431-PA	CG1950-PA	CG3431	CG1950
fly	ENSF00000004463	CG3526-PB	CG31835-PA	CG3526	CG31835
fly	ENSF00000003669	CG3534-PA	CG3544-PA	CG3534	CG3544
fly	ENSF00000001391	CG3566-PB	CG5157-PA	CG3566	CG5157
fly	ENSF00000000164	CG3668-PA	CG5069-PA	CG3668	CG5069
fly	ENSF00000004609	CG3774-PB	CG14511-PA	CG3774	CG14511
fly	ENSF00000003607	CG3917-PA	CG7716-PA	CG3917	CG7716
fly	ENSF00000004026	CG3977-PA	CG15551-PA	CG3977	CG15551
fly	ENSF00000005960	CG3988-PA	CG6208-PA	CG3988	CG6208
fly	ENSF00000001788	CG4003-PA	CG9750-PA	CG4003	CG9750
fly	ENSF00000000018	CG4027-PB	CG18290-PB	CG4027	CG18290
fly	ENSF00000000034	CG4147-PC	CG4264-PF	CG4147	CG4264
fly	ENSF00000000832	CG4173-PA	CG2916-PA	CG4173	CG2916
fly	ENSF00000000483	CG4178-PA	CG6806-PA	CG4178	CG6806
fly	ENSF00000003471	CG4199-PF	CG10700-PA	CG4199	CG10700
fly	ENSF00000001134	CG4211-PB	CG10328-PA	CG4211	CG10328
fly	ENSF00000001785	CG4254-PA	CG6873-PA	CG4254	CG6873
fly	ENSF00000000954	CG4274-PA	CG16783-PA	CG4274	CG16783
fly	ENSF00000001085	CG4341-PA	CG5038-PA	CG4341	CG5038
fly	ENSF00000000122	CG4386-PA	CG33127-PA	CG4386	CG33127
fly	ENSF00000003478	CG4407-PA	CG16848-PA	CG4407	CG16848
fly	ENSF00000002144	CG4448-PA	CG7704-PA	CG4448	CG7704
fly	ENSF00000001272	CG4546-PA	CG5144-PA	CG4546	CG5144
fly	ENSF00000000491	CG4569-PA	CG17268-PA	CG4569	CG17268
fly	ENSF00000000520	CG4600-PA	CG10932-PA	CG4600	CG10932
fly	ENSF00000002917	CG4802-PA	CG31115-PA	CG4802	CG31115
fly	ENSF00000001054	CG4858-PA	CG17904-PA	CG4858	CG17904
fly	ENSF00000003173	CG4988-PA	CG10467-PA	CG4988	CG10467
fly	ENSF00000000902	CG5001-PA	CG2887-PA	CG5001	CG2887
fly	ENSF00000002062	CG5014-PC	CG7919-PA	CG5014	CG7919
fly	ENSF00000001097	CG5017-PA	CG3708-PA	CG5017	CG3708
fly	ENSF00000002818	CG5025-PA	CG8553-PB	CG5025	CG8553
fly	ENSF00000001496	CG5182-PA	CG31003-PA	CG5182	CG31003
fly	ENSF00000000592	CG5195-PA	CG8896-PA	CG5195	CG8896
fly	ENSF00000005159	CG5196-PA	CG4483-PA	CG5196	CG4483
fly	ENSF00000000526	CG5229-PA	CG3025-PA	CG5229	CG3025
fly	ENSF00000002171	CG5241-PA	CG7860-PA	CG5241	CG7860
fly	ENSF00000005996	CG5254-PA	CG9582-PA	CG5254	CG9582
fly	ENSF00000000200	CG5255-PA	CG12385-PA	CG5255	CG12385
fly	ENSF00000004341	CG5268-PA	CG1409-PA	CG5268	CG1409
fly	ENSF00000001255	CG5319-PA	CG17068-PA	CG5319	CG17068
fly	ENSF00000000402	CG5646-PA	CG3057-PD	CG5646	CG3057
fly	ENSF00000004159	CG5703-PA	CG6485-PA	CG5703	CG6485
fly	ENSF00000000592	CG5820-PD	CG7250-PA	CG5820	CG7250
fly	ENSF00000000826	CG5826-PA	CG6888-PA	CG5826	CG6888
fly	ENSF00000000480	CG5925-PA	CG7923-PA	CG5925	CG7923
fly	ENSF00000000362	CG5940-PA	CG5814-PA	CG5940	CG5814
fly	ENSF00000001545	CG6028-PA	CG11251-PA	CG6028	CG11251
fly	ENSF00000000081	CG6041-PA	CG33160-PA	CG6041	CG33160
fly	ENSF00000000081	CG6048-PA	CG32277-PA	CG6048	CG32277
fly	ENSF00000000551	CG6074-PA	CG9235-PA	CG6074	CG9235
fly	ENSF00000000367	CG6142-PA	CG9519-PA	CG6142	CG9519
fly	ENSF00000000933	CG6382-PA	CG1898-PA	CG6382	CG1898
fly	ENSF00000002472	CG6627-PA	CG17198-PA	CG6627	CG17198
fly	ENSF00000000084	CG6717-PA	CG10956-PA	CG6717	CG10956
fly	ENSF00000003999	CG6719-PA	CG15676-PA	CG6719	CG15676
fly	ENSF00000000592	CG6749-PA	CG11910-PA	CG6749	CG11910
fly	ENSF00000000001	CG6792-PA	CG2116-PA	CG6792	CG2116
fly	ENSF00000000251	CG6842-PA	CG4701-PA	CG6842	CG4701
fly	ENSF00000002958	CG6851-PC	CG10920-PA	CG6851	CG10920
fly	ENSF00000002059	CG7283-PA	CG3843-PA	CG7283	CG3843
fly	ENSF00000002475	CG7311-PA	CG2137-PA	CG7311	CG2137
fly	ENSF00000002663	CG7365-PA	CG11029-PA	CG7365	CG11029
fly	ENSF00000015314	CG7384-PA	CG12446-PA	CG7384	CG12446
fly	ENSF00000002693	CG7413-PA	CG5083-PA	CG7413	CG5083
fly	ENSF00000000076	CG7576-PA	CG32439-PA	CG7576	CG32439
fly	ENSF00000001644	CG7601-PA	CG31937-PA	CG7601	CG31937
fly	ENSF00000006073	CG8004-PA	CG5662-PA	CG8004	CG5662
fly	ENSF00000000835	CG8105-PA	CG5361-PA	CG8105	CG5361
fly	ENSF00000000140	CG8188-PA	CG3473-PA	CG8188	CG3473
fly	ENSF00000009221	CG8247-PA	CG17957-PA	CG8247	CG17957
fly	ENSF00000003169	CG8310-PA	CG8186-PA	CG8310	CG8186
fly	ENSF00000000742	CG8331-PA	CG4960-PA	CG8331	CG4960
fly	ENSF00000001318	CG8409-PA	CG6990-PA	CG8409	CG6990
fly	ENSF00000000230	CG8560-PA	CG4408-PA	CG8560	CG4408
fly	ENSF00000000230	CG8562-PA	CG17633-PA	CG8562	CG17633
fly	ENSF00000004783	CG8636-PA	CG10881-PA	CG8636	CG10881
fly	ENSF00000000637	CG8770-PA	CG10763-PA	CG8770	CG10763
fly	ENSF00000000341	CG8790-PA	CG18418-PA	CG8790	CG18418
fly	ENSF00000001350	CG8804-PB	CG11437-PA	CG8804	CG11437
fly	ENSF00000000390	CG8918-PA	CG32238-PA	CG8918	CG32238
fly	ENSF00000006169	CG8931-PA	CG5755-PA	CG8931	CG5755
fly	ENSF00000002888	CG9053-PA	CG31787-PA	CG9053	CG31787
fly	ENSF00000002076	CG9066-PA	CG16957-PA	CG9066	CG16957
fly	ENSF00000005290	CG9168-PA	CG31933-PA	CG9168	CG31933
fly	ENSF00000000064	CG9222-PA	CG14305-PC	CG9222	CG14305
fly	ENSF00000001666	CG9244-PB	CG4706-PA	CG9244	CG4706
fly	ENSF00000000084	CG9455-PA	CG11331-PA	CG9455	CG11331
fly	ENSF00000000310	CG9634-PA	CG14529-PA	CG9634	CG14529
fly	ENSF00000000196	CG9699-PC	CG8705-PA	CG9699	CG8705
fly	ENSF00000000310	CG9761-PA	CG9505-PA	CG9761	CG9505
fly	ENSF00000001187	CG9868-PA	CG31742-PA	CG9868	CG31742
fly	ENSF00000003084	CG9888-PA	CG10909-PA	CG9888	CG10909
fly	ENSF00000003468	CG9998-PA	CG3162-PA	CG9998	CG3162
mosq	ENSF00000001841	AGAP000044-PA	AGAP001919-PA	AGAP000044	AGAP001919
mosq	ENSF00000000405	AGAP000099-PA	AGAP010423-PA	AGAP000099	AGAP010423
mosq	ENSF00000003672	AGAP000170-PA	AGAP003231-PA	AGAP000170	AGAP003231
mosq	ENSF00000001928	AGAP000325-PA	AGAP007858-PA	AGAP000325	AGAP007858
mosq	ENSF00000000402	AGAP000448-PA	AGAP006104-PA	AGAP000448	AGAP006104
mosq	ENSF00000004581	AGAP000495-PA	AGAP011076-PA	AGAP000495	AGAP011076
mosq	ENSF00000004073	AGAP000498-PA	AGAP007024-PA	AGAP000498	AGAP007024
mosq	ENSF00000000001	AGAP000507-PA	AGAP008845-PA	AGAP000507	AGAP008845
mosq	ENSF00000002697	AGAP000541-PA	AGAP009572-PA	AGAP000541	AGAP009572
mosq	ENSF00000009377	AGAP000580-PA	AGAP009402-PA	AGAP000580	AGAP009402
mosq	ENSF00000003811	AGAP000591-PA	AGAP002069-PA	AGAP000591	AGAP002069
mosq	ENSF00000000298	AGAP000616-PA	AGAP011557-PA	AGAP000616	AGAP011557
mosq	ENSF00000003782	AGAP000655-PA	AGAP002346-PA	AGAP000655	AGAP002346
mosq	ENSF00000017844	AGAP000669-PA	AGAP007630-PA	AGAP000669	AGAP007630
mosq	ENSF00000001663	AGAP000704-PA	AGAP009984-PA	AGAP000704	AGAP009984
mosq	ENSF00000002500	AGAP000725-PA	AGAP011684-PA	AGAP000725	AGAP011684
mosq	ENSF00000002078	AGAP000735-PA	AGAP002294-PA	AGAP000735	AGAP002294
mosq	ENSF00000001999	AGAP000739-PA	AGAP005469-PA	AGAP000739	AGAP005469
mosq	ENSF00000004206	AGAP000794-PA	AGAP006891-PA	AGAP000794	AGAP006891
mosq	ENSF00000002192	AGAP000812-PA	AGAP011060-PA	AGAP000812	AGAP011060
mosq	ENSF00000003450	AGAP000851-PA	AGAP008850-PA	AGAP000851	AGAP008850
mosq	ENSF00000001355	AGAP000852-PA	AGAP001701-PA	AGAP000852	AGAP001701
mosq	ENSF00000002128	AGAP000897-PA	AGAP005580-PA	AGAP000897	AGAP005580
mosq	ENSF00000000515	AGAP000927-PA	AGAP006361-PA	AGAP000927	AGAP006361
mosq	ENSF00000000920	AGAP000935-PA	AGAP005558-PA	AGAP000935	AGAP005558
mosq	ENSF00000000230	AGAP001026-PA	AGAP009593-PA	AGAP001026	AGAP009593
mosq	ENSF00000000820	AGAP001027-PA	AGAP005600-PA	AGAP001027	AGAP005600
mosq	ENSF00000000081	AGAP001190-PA	AGAP012778-PA	AGAP001190	AGAP012778
mosq	ENSF00000001440	AGAP001198-PA	AGAP012315-PA	AGAP001198	AGAP012315
mosq	ENSF00000000520	AGAP001318-PA	AGAP011329-PA	AGAP001318	AGAP011329
mosq	ENSF00000000084	AGAP001376-PA	AGAP009213-PA	AGAP001376	AGAP009213
mosq	ENSF00000000850	AGAP001592-PA	AGAP000115-PA	AGAP001592	AGAP000115
mosq	ENSF00000000479	AGAP001646-PA	AGAP008506-PA	AGAP001646	AGAP008506
mosq	ENSF00000000491	AGAP001995-PA	AGAP005423-PA	AGAP001995	AGAP005423
mosq	ENSF00000000543	AGAP002266-PA	AGAP008149-PA	AGAP002266	AGAP008149
mosq	ENSF00000001329	AGAP002355-PA	AGAP008988-PA	AGAP002355	AGAP008988
mosq	ENSF00000000551	AGAP002359-PA	AGAP010844-PA	AGAP002359	AGAP010844
mosq	ENSF00000000626	AGAP002432-PA	AGAP007262-PA	AGAP002432	AGAP007262
mosq	ENSF00000002171	AGAP002531-PA	AGAP011098-PA	AGAP002531	AGAP011098
mosq	ENSF00000000148	AGAP002770-PA	AGAP010971-PA	AGAP002770	AGAP010971
mosq	ENSF00000000285	AGAP003343-PA	AGAP012291-PA	AGAP003343	AGAP012291
[truncated: 68 more rows]
